# Supplementary material
Source: PubMed Central journal article supplement (PMC6576167)
Supplement: EMBJ-38-e101347-s001.pdf [file EMBJ-38-e101347-s001.pdf]

# **NUTRIENT-SENSITIVE TRANSCRIPTION FACTORS TFEB AND TFE3 COUPLE AUTOPHAGY AND METABOLISM TO THE PERIPHERAL CLOCK**

Nunzia Pastore<sup>1,2\*</sup>, Anna Vainshtein<sup>1,2</sup>, Niculin J. Herz<sup>1,2</sup>, Tuong Huynh<sup>1,2</sup>, Lorenzo Brunetti<sup>3,4</sup>, Tiamo J. Klisch<sup>1,2</sup>, Margherita Mutarelli<sup>5</sup>, Patrizia Annunziata<sup>5</sup>, Kenichiro Kinouchi<sup>6</sup>, Nicola Brunetti-Pierri<sup>5,7</sup>, Paolo Sassone-Corsi<sup>6</sup>, and Andrea Ballabio<sup>1,2,5,7\*</sup>

## **Appendix table of content:**

- **Appendix Figures**
- **Appendix Figure legends**
- **Appendix Tables**

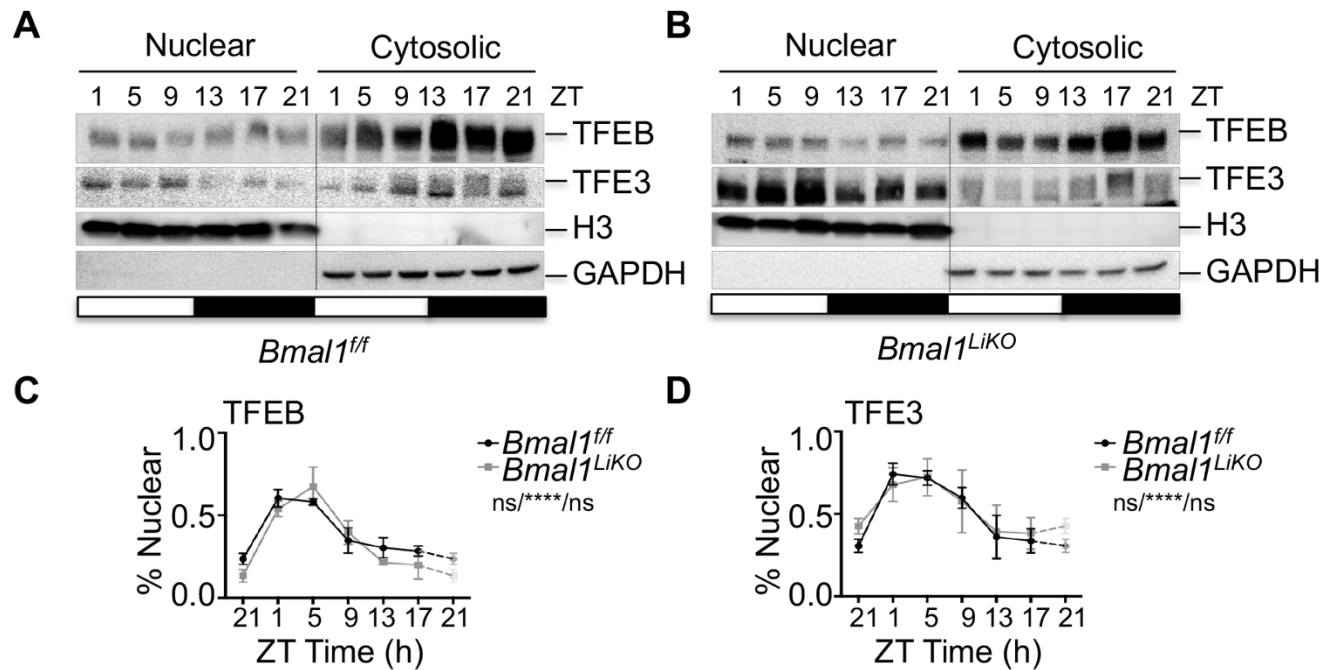

**Appendix Figure S1. TFEB and TFE3 nuclear localization over the circadian cycle is not dependent of the core clock component BMAL1.**

A,B Circadian activation of TFEB and TFE3 as determined by western blot analysis on nuclear and cytosolic enriched liver fractions (A) and relative quantification (B) from *Bmal1<sup>LiKO</sup>* mice and control ( $n=3$  samples/group/time point). ZT21 is double plotted for visualization. Data are presented as mean  $\pm$  SEM (two-way ANOVA test (interaction/time/group) followed by Bonferroni post hoc test: (ns non-significant; \*\*\*\* $p < 0.0001$ )).

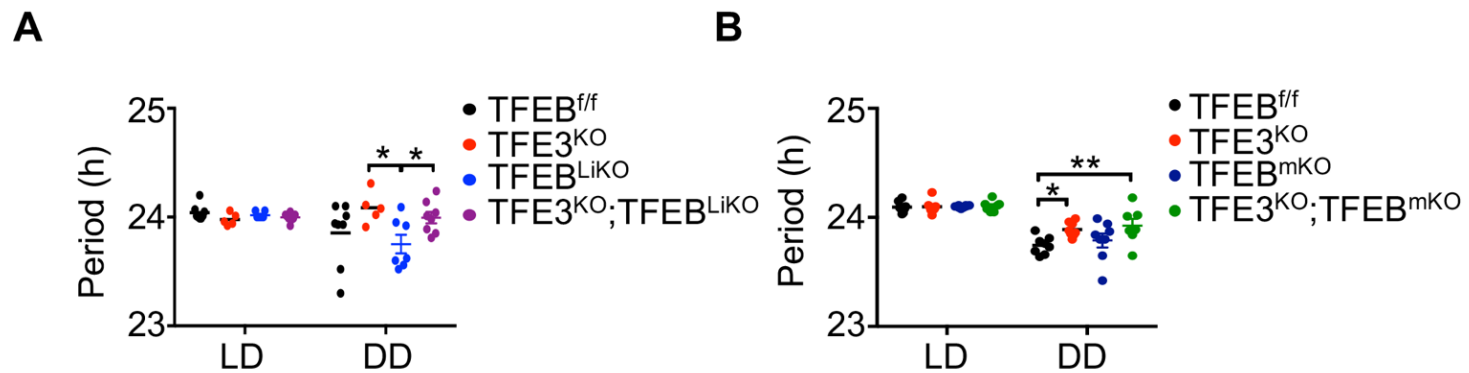

**Appendix Figure S2. TFEB/TFE3 deficiency does not alter the circadian period.**

A,B Circadian period ( $\tau$ ) in mice of the indicated genotypes under normal light:dark cycles 14:10 (LD) or constant darkness (DD) (n=6-8/group). Data are presented as mean  $\pm$  SEM. (two-way ANOVA test followed by Bonferroni post hoc test: \* $p \leq 0.05$ ; \*\* $p < 0.01$ ).

## Appendix Tables

**Appendix Table 1.** Complete list of the transcripts bound by TFE3, TFEB and REV-ERB $\alpha$ . Autophagy, lysosome and circadian rhythm genes are indicated.

| RefSeq       | Symbol   | Autophagy | Lysosome | Circadian Rhythm | TFEB HeLA targets | Tfe3 in promoter | Rev-erbA in promoter | Overlap in promoter | Promoter coordinates     |
|--------------|----------|-----------|----------|------------------|-------------------|------------------|----------------------|---------------------|--------------------------|
| NM_009397    | Tnfrsf3  | YES       | YES      |                  | YES               | YES              | YES                  | YES                 | chr10:18737716-18733716  |
| NM_138950    | Wdr81    | YES       | YES      |                  | YES               | YES              | YES                  | YES                 | chr11:75270719-75266719  |
| NM_001003908 | Cltc     | YES       | YES      |                  | YES               | YES              | YES                  | YES                 | chr11:86573569-86569569  |
| NM_001356393 | Cltc     | YES       | YES      |                  | YES               | YES              | YES                  | YES                 | chr11:86573569-86569569  |
| NM_017475    | Rragc    | YES       | YES      |                  | YES               | YES              | YES                  | YES                 | chr4:123592175-123596175 |
| NM_001359513 | Vps33a   | YES       | YES      |                  | YES               | YES              | YES                  | YES                 | chr5:124025524-124021524 |
| NM_029929    | Vps33a   | YES       | YES      |                  | YES               | YES              | YES                  | YES                 | chr5:124025524-124021524 |
| NM_178635    | Uvrag    | YES       | YES      |                  | YES               | YES              | YES                  | YES                 | chr7:106292154-106288154 |
| NM_053177    | Mcoln1   | YES       | YES      |                  | YES               | YES              | YES                  | YES                 | chr8:3498018-3502018     |
| NM_001317353 | Lamp1    | YES       | YES      |                  | YES               | YES              | YES                  | YES                 | chr8:13156660-13160660   |
| NM_010684    | Lamp1    | YES       | YES      |                  | YES               | YES              | YES                  | YES                 | chr8:13156660-13160660   |
| NM_009984    | Ctsl     | YES       | YES      |                  |                   | YES              | YES                  | YES                 | chr13:64474328-64470328  |
| NM_009713    | Arsa     | YES       | YES      |                  |                   | YES              | YES                  | YES                 | chr15:89310355-89306355  |
| NM_001200038 | Rubcn    | YES       | YES      |                  |                   | YES              | YES                  | YES                 | chr16:32870952-32866952  |
| NM_172615    | Rubcn    | YES       | YES      |                  |                   | YES              | YES                  | YES                 | chr16:32870952-32866952  |
| NM_029623    | Rmc1     | YES       | YES      |                  |                   | YES              | YES                  | YES                 | chr18:12324738-12328738  |
| NM_009983    | Ctsd     | YES       | YES      |                  |                   | YES              | YES                  | YES                 | chr7:149576232-149572232 |
| NM_001310442 | Atp6v1h  | YES       |          |                  | YES               | YES              | YES                  | YES                 | chr1:5070666-5074666     |
| NM_133826    | Atp6v1h  | YES       |          |                  | YES               | YES              | YES                  | YES                 | chr1:5070666-5074666     |
| NM_011796    | Capn10   | YES       |          |                  | YES               | YES              | YES                  | YES                 | chr1:94828484-94832484   |
| NM_178691    | Yod1     | YES       |          |                  | YES               | YES              | YES                  | YES                 | chr1:132611403-132615403 |
| NM_001163754 | Rab3gap2 | YES       |          |                  | YES               | YES              | YES                  | YES                 | chr1:187025546-187029546 |
| NM_001314013 | Atg5     | YES       |          |                  | YES               | YES              | YES                  | YES                 | chr10:43985644-43989644  |
| NM_001358596 | Atg5     | YES       |          |                  | YES               | YES              | YES                  | YES                 | chr10:43985644-43989644  |
| NM_053069    | Atg5     | YES       |          |                  | YES               | YES              | YES                  | YES                 | chr10:43985644-43989644  |

|              |           |     |  |  |     |     |     |     |                           |
|--------------|-----------|-----|--|--|-----|-----|-----|-----|---------------------------|
| NM_001036293 | Nrbf2     | YES |  |  | YES | YES | YES | YES | chr10:66750529-66746529   |
| NM_001290183 | Ddit3     | YES |  |  | YES | YES | YES | YES | chr10:126725348-126729348 |
| NM_007837    | Ddit3     | YES |  |  | YES | YES | YES | YES | chr10:126725348-126729348 |
| NM_001271356 | Flcn      | YES |  |  | YES | YES | YES | YES | chr11:59626041-59622041   |
| NM_001271357 | Flcn      | YES |  |  | YES | YES | YES | YES | chr11:59625603-59621603   |
| NM_146018    | Flcn      | YES |  |  | YES | YES | YES | YES | chr11:59626041-59622041   |
| NR_073164    | Flcn      | YES |  |  | YES | YES | YES | YES | chr11:59626041-59622041   |
| NR_156702    | Flcn      | YES |  |  | YES | YES | YES | YES | chr11:59626041-59622041   |
| NM_001085440 | Smcr8     | YES |  |  | YES | YES | YES | YES | chr11:60588526-60592526   |
| NM_175491    | Smcr8     | YES |  |  | YES | YES | YES | YES | chr11:60588526-60592526   |
| NM_001304432 | Eif4g1    | YES |  |  | YES | YES | YES | YES | chr16:20670299-20674299   |
| NM_145941    | Eif4g1    | YES |  |  | YES | YES | YES | YES | chr16:20670299-20674299   |
| NM_001356366 | Atg3      | YES |  |  | YES | YES | YES | YES | chr16:45156441-45160441   |
| NM_026402    | Atg3      | YES |  |  | YES | YES | YES | YES | chr16:45156441-45160441   |
| NM_001361188 | Trappc8   | YES |  |  | YES | YES | YES | YES | chr18:21057079-21053079   |
| NM_177038    | Trappc8   | YES |  |  | YES | YES | YES | YES | chr18:21057079-21053079   |
| NM_029491    | Trappc8   | YES |  |  | YES | YES | YES | YES | chr18:21057079-21053079   |
| NM_001195633 | Epg5      | YES |  |  | YES | YES | YES | YES | chr18:78132704-78136704   |
| NM_001289575 | Tsc1      | YES |  |  | YES | YES | YES | YES | chr2:28494252-28498252    |
| NM_001289576 | Tsc1      | YES |  |  | YES | YES | YES | YES | chr2:28494252-28498252    |
| NM_022887    | Tsc1      | YES |  |  | YES | YES | YES | YES | chr2:28494252-28498252    |
| NM_020590    | Gabarapl1 | YES |  |  | YES | YES | YES | YES | chr6:129480709-129484709  |
| NM_010442    | Hmox1     | YES |  |  | YES | YES | YES | YES | chr8:77615016-77619016    |
| NM_001310624 | Pikfyve   | YES |  |  |     | YES | YES | YES | chr1:65230758-65234758    |
| NM_011086    | Pikfyve   | YES |  |  |     | YES | YES | YES | chr1:65230758-65234758    |
| NM_022327    | Ralb      | YES |  |  |     | YES | YES | YES | chr1:121403859-121399859  |
| NM_028860    | Mttr3     | YES |  |  |     | YES | YES | YES | chr11:4497318-4493318     |
| NM_011694    | Vdac1     | YES |  |  |     | YES | YES | YES | chr11:52171852-52175852   |
| NM_001362693 | Vdac1     | YES |  |  |     | YES | YES | YES | chr11:52172598-52176598   |
| NM_001358315 | Srebf1    | YES |  |  |     | YES | YES | YES | chr11:60038583-60034583   |
| NM_026389    | Poldip2   | YES |  |  |     | YES | YES | YES | chr11:78323297-78327297   |
| NM_029654    | Atg2b     | YES |  |  |     | YES | YES |     | chr12:106925951-106921951 |
| NM_009000    | Rab24     | YES |  |  |     | YES | YES |     | chr13:55425841-55421841   |
| NM_025770    | Atg10     | YES |  |  |     | YES | YES | YES | chr13:91366092-91362092   |

|              |           |     |     |  |     |     |     |     |                           |
|--------------|-----------|-----|-----|--|-----|-----|-----|-----|---------------------------|
| NM_172599    | Atg14     | YES |     |  |     | YES | YES | YES | chr14:48190609-48186609   |
| NM_001285991 | Tbc1d5    | YES |     |  |     | YES | YES | YES | chr17:51321177-51317177   |
| NM_028162    | Tbc1d5    | YES |     |  |     | YES | YES | YES | chr17:51321177-51317177   |
| NM_026833    | Washc1    | YES |     |  |     | YES | YES | YES | chr17:66458385-66462385   |
| NM_001037757 | Washc1    | YES |     |  |     | YES | YES | YES | chr17:66458484-66462484   |
| NM_053100    | Trim8     | YES |     |  |     | YES | YES | YES | chr19:46573637-46577637   |
| NM_033526    | Ubqln4    | YES |     |  |     | YES | YES | YES | chr3:88355137-88359137    |
| NM_026689    | Mul1      | YES |     |  |     | YES | YES | YES | chr4:137988086-137992086  |
| NM_025562    | Fis1      | YES |     |  |     | YES | YES |     | chr5:137435446-137439446  |
| NM_026693    | Gabarapl2 | YES |     |  |     | YES | YES | YES | chr8:114462102-114466102  |
| NM_001357241 | Pafah1b2  | YES |     |  |     | YES | YES | YES | chr9:45823273-45819273    |
| NM_016898    | Cd164     |     | YES |  | YES | YES | YES | YES | chr10:41236805-41240805   |
| NM_001113355 | Vps26a    |     | YES |  | YES | YES | YES | YES | chr10:61951846-61947846   |
| NM_001358543 | Vps26a    |     | YES |  | YES | YES | YES | YES | chr10:61952053-61948053   |
| NM_133672    | Vps26a    |     | YES |  | YES | YES | YES | YES | chr10:61952053-61948053   |
| NM_001364695 | Gns       |     | YES |  | YES | YES | YES | YES | chr10:120799645-120803645 |
| NM_029364    | Gns       |     | YES |  | YES | YES | YES | YES | chr10:120799645-120803645 |
| NM_015740    | Bloc1s1   |     | YES |  | YES | YES | YES | YES | chr10:128363080-128359080 |
| NM_153139    | Slc36a1   |     | YES |  | YES | YES | YES | YES | chr11:55015341-55019341   |
| NM_008175    | Grn       |     | YES |  | YES | YES | YES | YES | chr11:102289135-102293135 |
| NM_001159324 | Gaa       |     | YES |  | YES | YES | YES | YES | chr11:119126776-119130776 |
| NM_008064    | Gaa       |     | YES |  | YES | YES | YES | YES | chr11:119126776-119130776 |
| NM_018822    | Sgsh      |     | YES |  | YES | YES | YES | YES | chr11:119219324-119215324 |
| NM_178743    | Slc26a11  |     | YES |  | YES | YES | YES | YES | chr11:119214370-119218370 |
| NM_153550    | Dirc2     |     | YES |  | YES | YES | YES | YES | chr16:35771956-35767956   |
| NM_011930    | Clcn7     |     | YES |  | YES | YES | YES | YES | chr17:25267835-25271835   |
| NM_001357463 | Snx2      |     | YES |  | YES | YES | YES | YES | chr18:53333445-53337445   |
| NM_026386    | Snx2      |     | YES |  | YES | YES | YES | YES | chr18:53333445-53337445   |
| NM_001081108 | Lamtor4   |     | YES |  | YES | YES | YES | YES | chr5:138694209-138698209  |
| NM_001302383 | March8    |     | YES |  | YES | YES | YES | YES | chr6:116285539-116289539  |
| NM_001302384 | March8    |     | YES |  | YES | YES | YES | YES | chr6:116285539-116289539  |
| NM_001302385 | March8    |     | YES |  | YES | YES | YES | YES | chr6:116285539-116289539  |
| NM_027920    | March8    |     | YES |  | YES | YES | YES | YES | chr6:116285539-116289539  |
| NM_010749    | M6pr      |     | YES |  | YES | YES | YES | YES | chr6:122256237-122260237  |

|              |         |  |     |     |     |     |     |     |                          |
|--------------|---------|--|-----|-----|-----|-----|-----|-----|--------------------------|
| NM_025605    | Lamtor1 |  | YES |     | YES | YES | YES | YES | chr7:109051850-109055850 |
| NM_010421    | Hexa    |  | YES |     | YES | YES | YES | YES | chr9:59384846-59388846   |
| NM_007494    | Ass1    |  | YES | YES |     | YES | YES | YES | chr2:31323289-31327289   |
| NM_026719    | Lmbrd1  |  | YES |     |     | YES | YES | YES | chr1:24682882-24686882   |
| NM_001310483 | Lmbrd1  |  | YES |     |     | YES | YES | YES | chr1:24683256-24687256   |
| NM_001146120 | Psap    |  | YES |     |     | YES | YES | YES | chr10:59737875-59741875  |
| NM_001146121 | Psap    |  | YES |     |     | YES | YES | YES | chr10:59737875-59741875  |
| NM_001146122 | Psap    |  | YES |     |     | YES | YES | YES | chr10:59737875-59741875  |
| NM_001146123 | Psap    |  | YES |     |     | YES | YES | YES | chr10:59737875-59741875  |
| NM_011179    | Psap    |  | YES |     |     | YES | YES | YES | chr10:59737875-59741875  |
| NM_031251    | Ctns    |  | YES |     |     | YES | YES |     | chr11:73015021-73011021  |
| NM_001357891 | Ctns    |  | YES |     |     | YES | YES |     | chr11:73015044-73011044  |
| NM_001357892 | Ctns    |  | YES |     |     | YES | YES |     | chr11:73015044-73011044  |
| NM_199199    | Tmem199 |  | YES |     |     | YES | YES | YES | chr11:78328170-78324170  |
| NM_133706    | Tmem97  |  | YES |     |     | YES | YES | YES | chr11:78366737-78362737  |
| NM_023409    | Npc2    |  | YES |     |     | YES | YES |     | chr12:86116562-86112562  |
| NM_008079    | Galc    |  | YES |     |     | YES | YES | YES | chr12:99500169-99496169  |
| NM_001033271 | Pip4p1  |  | YES |     |     | YES | YES | YES | chr14:51553024-51549024  |
| NM_001310505 | Pip4p1  |  | YES |     |     | YES | YES | YES | chr14:51553024-51549024  |
| NM_001310506 | Pip4p1  |  | YES |     |     | YES | YES | YES | chr14:51553024-51549024  |
| NM_001310507 | Pip4p1  |  | YES |     |     | YES | YES | YES | chr14:51553024-51549024  |
| NM_007798    | Ctsb    |  | YES |     |     | YES | YES | YES | chr14:63738798-63742798  |
| NM_033521    | Laptm4b |  | YES |     |     | YES | YES | YES | chr15:34165280-34169280  |
| NM_001355546 | Naga    |  | YES |     |     | YES | YES | YES | chr15:82171756-82167756  |
| NM_008669    | Naga    |  | YES |     |     | YES | YES | YES | chr15:82171756-82167756  |
| NM_010386    | H2-DMa  |  | YES |     |     | YES | YES | YES | chr17:34257276-34261276  |
| NM_019441    | Ppt2    |  | YES |     |     | YES | YES |     | chr17:34766593-34762593  |
| NM_001039088 | Seh1l   |  | YES |     |     | YES | YES | YES | chr18:67932029-67936029  |
| NM_001360934 | Seh1l   |  | YES |     |     | YES | YES | YES | chr18:67932029-67936029  |
| NM_028112    | Seh1l   |  | YES |     |     | YES | YES | YES | chr18:67932029-67936029  |
| NM_146251    | Pnpla7  |  | YES |     |     | YES | YES | YES | chr2:24829052-24833052   |
| NM_031843    | Dpp7    |  | YES |     |     | YES | YES | YES | chr2:25214352-25210352   |
| NM_031248    | Lamtor2 |  | YES |     |     | YES | YES | YES | chr3:88359373-88355373   |
| NR_155541    | Lamtor2 |  | YES |     |     | YES | YES | YES | chr3:88359373-88355373   |

|              |          |  |     |     |     |     |     |     |                           |
|--------------|----------|--|-----|-----|-----|-----|-----|-----|---------------------------|
| NR_155542    | Lamtor2  |  | YES |     |     | YES | YES | YES | chr3:88359373-88355373    |
| NR_155543    | Lamtor2  |  | YES |     |     | YES | YES | YES | chr3:88359373-88355373    |
| NM_001362368 | Lamtor2  |  | YES |     |     | YES | YES | YES | chr3:88359373-88355373    |
| NM_027855    | Atraid   |  | YES |     |     | YES | YES | YES | chr5:31348512-31352512    |
| NM_212470    | Atraid   |  | YES |     |     | YES | YES | YES | chr5:31348512-31352512    |
| NM_018772    | Bri3     |  | YES |     |     | YES | YES | YES | chr5:145013593-145017593  |
| NM_027992    | Tmem106b |  | YES |     |     | YES | YES | YES | chr6:13017258-13021258    |
| NM_001305819 | Apoe     |  | YES |     |     | YES | YES | YES | chr7:20286247-20282247    |
| NM_001305843 | Apoe     |  | YES |     |     | YES | YES | YES | chr7:20287037-20283037    |
| NM_001305844 | Apoe     |  | YES |     |     | YES | YES | YES | chr7:20286470-20282470    |
| NM_009696    | Apoe     |  | YES |     |     | YES | YES | YES | chr7:20287037-20283037    |
| NM_010240    | Ftl1     |  | YES |     |     | YES | YES | YES | chr7:52717756-52713756    |
| NM_019734    | Asah1    |  | YES |     |     | YES | YES | YES | chr8:42462551-42458551    |
| NM_001163747 | Tmem192  |  | YES |     |     | YES | YES | YES | chr8:67468583-67472583    |
| NM_028427    | Tmem192  |  | YES |     |     | YES | YES | YES | chr8:67468583-67472583    |
| NM_023065    | lfi30    |  | YES |     |     | YES | YES |     | chr8:73293062-73289062    |
| NM_010764    | Man2b1   |  | YES |     |     | YES | YES | YES | chr8:87604667-87608667    |
| NM_013602    | Mt1      |  | YES |     |     | YES | YES | YES | chr8:96700488-96704488    |
| NM_001331161 | Hyal1    |  | YES |     |     | YES | YES | YES | chr9:107476757-107480757  |
| NM_008317    | Hyal1    |  | YES |     |     | YES | YES | YES | chr9:107476757-107480757  |
| NM_145434    | Nr1d1    |  |     | YES | YES | YES | YES | YES | chr11:98639191-98635191   |
| NM_013792    | Naglu    |  |     | YES | YES | YES | YES | YES | chr11:100928907-100932907 |
| NM_001355676 | Ddx5     |  |     | YES | YES | YES | YES | YES | chr11:106652721-106648721 |
| NM_001355677 | Ddx5     |  |     | YES | YES | YES | YES | YES | chr11:106652999-106648999 |
| NM_007840    | Ddx5     |  |     | YES | YES | YES | YES | YES | chr11:106652308-106648308 |
| NM_001289429 | Cipc     |  |     | YES | YES | YES | YES | YES | chr12:88285490-88289490   |
| NM_001289430 | Cipc     |  |     | YES | YES | YES | YES | YES | chr12:88285490-88289490   |
| NM_001289431 | Cipc     |  |     | YES | YES | YES | YES | YES | chr12:88285490-88289490   |
| NM_001289432 | Cipc     |  |     | YES | YES | YES | YES | YES | chr12:88285792-88289792   |
| NM_001364274 | Cipc     |  |     | YES | YES | YES | YES | YES | chr12:88285792-88289792   |
| NM_173735    | Cipc     |  |     | YES | YES | YES | YES | YES | chr12:88285792-88289792   |
| NR_157110    | Cipc     |  |     | YES | YES | YES | YES | YES | chr12:88285792-88289792   |
| NM_001287180 | Atf4     |  |     | YES | YES | YES | YES | YES | chr15:80083113-80087113   |
| NM_009716    | Atf4     |  |     | YES | YES | YES | YES | YES | chr15:80083113-80087113   |



|              |         |  |  |     |     |     |     |     |                          |
|--------------|---------|--|--|-----|-----|-----|-----|-----|--------------------------|
| NM_007890    | Dyrk1a  |  |  | YES | YES | YES | YES | YES | chr16:94789312-94793312  |
| NM_001113389 | Dyrk1a  |  |  | YES | YES | YES | YES | YES | chr16:94790013-94794013  |
| NM_001356455 | Thrap3  |  |  | YES | YES | YES | YES | YES | chr4:125882454-125878454 |
| NM_001356456 | Thrap3  |  |  | YES | YES | YES | YES | YES | chr4:125880751-125876751 |
| NM_146153    | Thrap3  |  |  | YES | YES | YES | YES | YES | chr4:125882454-125878454 |
| NM_011498    | Bhlhe40 |  |  | YES | YES | YES | YES | YES | chr6:108608122-108612122 |
| NM_145381    | Lactb2  |  |  |     | YES | YES | YES | YES | chr1:13653090-13649090   |
| NM_001097644 | Ccnyl1  |  |  |     | YES | YES | YES |     | chr1:64735418-64739418   |
| NM_001356264 | Cnppd1  |  |  |     | YES | YES | YES | YES | chr1:75140765-75136765   |
| NM_026977    | Cnppd1  |  |  |     | YES | YES | YES | YES | chr1:75141785-75137785   |
| NM_023732    | Abcb6   |  |  |     | YES | YES | YES | YES | chr1:75179466-75175466   |
| NM_010880    | Ncl     |  |  |     | YES | YES | YES | YES | chr1:88258530-88254530   |
| NM_001110212 | Gigyf2  |  |  |     | YES | YES | YES | YES | chr1:89221072-89225072   |
| NM_146112    | Gigyf2  |  |  |     | YES | YES | YES | YES | chr1:89221072-89225072   |
| NR_027859    | Pfkfb2  |  |  |     | YES | YES | YES | YES | chr1:132614898-132610898 |
| NM_008825    | Pfkfb2  |  |  |     | YES | YES | YES | YES | chr1:132614898-132610898 |
| NM_001162416 | Pfkfb2  |  |  |     | YES | YES | YES | YES | chr1:132613653-132609653 |
| NM_001357228 | Zc3h11a |  |  |     | YES | YES | YES | YES | chr1:135560476-135556476 |
| NM_001276767 | Zc3h11a |  |  |     | YES | YES | YES | YES | chr1:135560476-135556476 |
| NM_144530    | Zc3h11a |  |  |     | YES | YES | YES | YES | chr1:135560476-135556476 |
| NM_030245    | Tada1   |  |  |     | YES | YES | YES | YES | chr1:168306797-168310797 |
| NM_001358796 | Rmnd1   |  |  |     | YES | YES | YES | YES | chr10:5911652-5915652    |
| NM_025343    | Rmnd1   |  |  |     | YES | YES | YES | YES | chr10:5911652-5915652    |
| NM_001359806 | Supv3l1 |  |  |     | YES | YES | YES | YES | chr10:61914986-61910986  |
| NM_181423    | Supv3l1 |  |  |     | YES | YES | YES | YES | chr10:61914986-61910986  |
| NM_026201    | Ccar1   |  |  |     | YES | YES | YES | YES | chr10:62257616-62253616  |
| NM_173751    | Ilvbl   |  |  |     | YES | YES | YES | YES | chr10:78034744-78038744  |
| NM_001359301 | Ilvbl   |  |  |     | YES | YES | YES | YES | chr10:78034757-78038757  |
| NM_001359302 | Ilvbl   |  |  |     | YES | YES | YES | YES | chr10:78035235-78039235  |
| NM_001359303 | Ilvbl   |  |  |     | YES | YES | YES | YES | chr10:78035235-78039235  |
| NM_001077184 | Bsg     |  |  |     | YES | YES | YES | YES | chr10:79164602-79168602  |
| NM_009768    | Bsg     |  |  |     | YES | YES | YES | YES | chr10:79164602-79168602  |
| NM_001077363 | Ptbp1   |  |  |     | YES | YES | YES | YES | chr10:79314676-79318676  |
| NM_001283013 | Ptbp1   |  |  |     | YES | YES | YES | YES | chr10:79314676-79318676  |

|              |        |  |  |  |     |     |     |     |                           |
|--------------|--------|--|--|--|-----|-----|-----|-----|---------------------------|
| NM_008956    | Ptbp1  |  |  |  | YES | YES | YES | YES | chr10:79314676-79318676   |
| NM_021501    | Pias4  |  |  |  | YES | YES | YES | YES | chr10:80632965-80628965   |
| NM_007907    | Eef2   |  |  |  | YES | YES | YES | YES | chr10:80636875-80640875   |
| NM_001168655 | Socs2  |  |  |  | YES | YES | YES | YES | chr10:94881346-94877346   |
| NM_001168656 | Socs2  |  |  |  | YES | YES | YES | YES | chr10:94880618-94876618   |
| NM_001168657 | Socs2  |  |  |  | YES | YES | YES | YES | chr10:94880417-94876417   |
| NM_007706    | Socs2  |  |  |  | YES | YES | YES | YES | chr10:94881991-94877991   |
| NM_001003717 | Osbpl8 |  |  |  | YES | YES | YES | YES | chr10:110599357-110603357 |
| NM_175489    | Osbpl8 |  |  |  | YES | YES | YES | YES | chr10:110599357-110603357 |
| NM_001355005 | Cdk4   |  |  |  | YES | YES | YES | YES | chr10:126498090-126502090 |
| NM_009870    | Cdk4   |  |  |  | YES | YES | YES | YES | chr10:126498090-126502090 |
| NM_001347171 | Mbd6   |  |  |  | YES | YES | YES | YES | chr10:126728574-126724574 |
| NM_033072    | Mbd6   |  |  |  | YES | YES | YES | YES | chr10:126728574-126724574 |
| NM_009284    | Stat6  |  |  |  | YES | YES | YES | YES | chr10:127077541-127081541 |
| NM_026444    | Cs     |  |  |  | YES | YES | YES |     | chr10:127772282-127776282 |
| NM_026443    | Mtfp1  |  |  |  | YES | YES | YES | YES | chr11:3997934-3993934     |
| NM_001077661 | Urgcp  |  |  |  | YES | YES | YES | YES | chr11:5664879-5660879     |
| NM_001361588 | Urgcp  |  |  |  | YES | YES | YES | YES | chr11:5664879-5660879     |
| NM_001361589 | Urgcp  |  |  |  | YES | YES | YES | YES | chr11:5664879-5660879     |
| NM_001361592 | Urgcp  |  |  |  | YES | YES | YES | YES | chr11:5664879-5660879     |
| NM_001252282 | Ogdh   |  |  |  | YES | YES | YES | YES | chr11:6189099-6193099     |
| NM_001252283 | Ogdh   |  |  |  | YES | YES | YES | YES | chr11:6189099-6193099     |
| NM_010956    | Ogdh   |  |  |  | YES | YES | YES | YES | chr11:6189099-6193099     |
| NM_001361905 | Ogdh   |  |  |  | YES | YES | YES | YES | chr11:6189108-6193108     |
| NM_001252287 | Ogdh   |  |  |  | YES | YES | YES | YES | chr11:6189161-6193161     |
| NM_001361903 | Ogdh   |  |  |  | YES | YES | YES | YES | chr11:6189161-6193161     |
| NM_001361904 | Ogdh   |  |  |  | YES | YES | YES | YES | chr11:6189672-6193672     |
| NM_001252288 | Ogdh   |  |  |  | YES | YES | YES | YES | chr11:6190060-6194060     |
| NM_001361902 | Ogdh   |  |  |  | YES | YES | YES | YES | chr11:6190081-6194081     |
| NM_001290676 | Cpeb4  |  |  |  | YES | YES | YES | YES | chr11:31768439-31772439   |
| NM_001290678 | Cpeb4  |  |  |  | YES | YES | YES | YES | chr11:31768439-31772439   |
| NM_026252    | Cpeb4  |  |  |  | YES | YES | YES | YES | chr11:31768439-31772439   |
| NM_001252260 | Npm1   |  |  |  | YES | YES | YES |     | chr11:33065706-33061706   |
| NM_008722    | Npm1   |  |  |  | YES | YES | YES |     | chr11:33065706-33061706   |

|              |        |  |  |  |     |     |     |     |                           |
|--------------|--------|--|--|--|-----|-----|-----|-----|---------------------------|
| NM_001252261 | Npm1   |  |  |  | YES | YES | YES |     | chr11:33065706-33061706   |
| NM_001362685 | Ube2b  |  |  |  | YES | YES | YES | YES | chr11:51816788-51812788   |
| NM_001362686 | Ube2b  |  |  |  | YES | YES | YES | YES | chr11:51816493-51812493   |
| NM_009458    | Ube2b  |  |  |  | YES | YES | YES | YES | chr11:51816493-51812493   |
| NM_009012    | Rad50  |  |  |  | YES | YES | YES | YES | chr11:53523321-53519321   |
| NM_001039092 | Tom1l2 |  |  |  | YES | YES | YES | YES | chr11:60168907-60164907   |
| NM_153080    | Tom1l2 |  |  |  | YES | YES | YES | YES | chr11:60168907-60164907   |
| NM_001039093 | Tom1l2 |  |  |  | YES | YES | YES | YES | chr11:60168907-60164907   |
| NM_001359810 | Tom1l2 |  |  |  | YES | YES | YES | YES | chr11:60168907-60164907   |
| NM_009410    | Top3a  |  |  |  | YES | YES | YES | YES | chr11:60593367-60589367   |
| NM_009171    | Shmt1  |  |  |  | YES | YES | YES | YES | chr11:60627267-60623267   |
| NM_019921    | Akap10 |  |  |  | YES | YES | YES | YES | chr11:61746259-61742259   |
| NM_007888    | Dvl2   |  |  |  | YES | YES | YES | YES | chr11:69811593-69815593   |
| NM_001164223 | Rpa1   |  |  |  | YES | YES | YES | YES | chr11:75164385-75160385   |
| NM_026653    | Rpa1   |  |  |  | YES | YES | YES | YES | chr11:75164385-75160385   |
| NM_001102611 | Smyd4  |  |  |  | YES | YES | YES | YES | chr11:75159434-75163434   |
| NM_001029934 | Usp32  |  |  |  | YES | YES | YES | YES | chr11:84955957-84951957   |
| NM_001080931 | Med13  |  |  |  | YES | YES | YES | YES | chr11:86173527-86169527   |
| NM_009546    | Trim25 |  |  |  | YES | YES | YES | YES | chr11:88858216-88862216   |
| NM_001013375 | Utp18  |  |  |  | YES | YES | YES | YES | chr11:93749580-93745580   |
| NM_001363336 | Mbtd1  |  |  |  | YES | YES | YES | YES | chr11:93744663-93748663   |
| NM_001346525 | Mbtd1  |  |  |  | YES | YES | YES | YES | chr11:93744984-93748984   |
| NM_134012    | Mbtd1  |  |  |  | YES | YES | YES | YES | chr11:93744984-93748984   |
| NM_134021    | Pnpo   |  |  |  | YES | YES | YES | YES | chr11:96807833-96803833   |
| NM_028207    | Dusp3  |  |  |  | YES | YES | YES | YES | chr11:101848605-101844605 |
| NM_001077696 | Hdac5  |  |  |  | YES | YES | YES | YES | chr11:102093986-102089986 |
| NM_001284248 | Hdac5  |  |  |  | YES | YES | YES | YES | chr11:102093986-102089986 |
| NM_001284249 | Hdac5  |  |  |  | YES | YES | YES | YES | chr11:102093986-102089986 |
| NM_001284250 | Hdac5  |  |  |  | YES | YES | YES | YES | chr11:102093986-102089986 |
| NM_001361596 | Hdac5  |  |  |  | YES | YES | YES | YES | chr11:102093986-102089986 |
| NM_010412    | Hdac5  |  |  |  | YES | YES | YES | YES | chr11:102093986-102089986 |
| NM_001166685 | Cep95  |  |  |  | YES | YES | YES | YES | chr11:106648065-106652065 |
| NM_177088    | Cep95  |  |  |  | YES | YES | YES | YES | chr11:106648065-106652065 |
| NM_010303    | Gna13  |  |  |  | YES | YES | YES |     | chr11:109221607-109225607 |

|              |         |  |  |  |     |     |     |     |                           |
|--------------|---------|--|--|--|-----|-----|-----|-----|---------------------------|
| NM_001359034 | Gna13   |  |  |  | YES | YES | YES |     | chr11:109221644-109225644 |
| NM_001347642 | Wbp2    |  |  |  | YES | YES | YES | YES | chr11:115950809-115946809 |
| NM_001361446 | Wbp2    |  |  |  | YES | YES | YES | YES | chr11:115950809-115946809 |
| NM_016852    | Wbp2    |  |  |  | YES | YES | YES | YES | chr11:115950809-115946809 |
| NM_001271898 | Acox1   |  |  |  | YES | YES | YES | YES | chr11:116062859-116058859 |
| NM_015729    | Acox1   |  |  |  | YES | YES | YES | YES | chr11:116062859-116058859 |
| NM_027107    | Ten1    |  |  |  | YES | YES | YES | YES | chr11:116057668-116061668 |
| NM_011358    | Srsf2   |  |  |  | YES | YES | YES | YES | chr11:116716908-116712908 |
| NM_001361585 | Mfsd11  |  |  |  | YES | YES | YES | YES | chr11:116712575-116716575 |
| NM_001361586 | Mfsd11  |  |  |  | YES | YES | YES | YES | chr11:116712813-116716813 |
| NM_001361587 | Mfsd11  |  |  |  | YES | YES | YES | YES | chr11:116712813-116716813 |
| NM_178620    | Mfsd11  |  |  |  | YES | YES | YES | YES | chr11:116712813-116716813 |
| NM_010756    | Mafg    |  |  |  | YES | YES | YES | YES | chr11:120497361-120493361 |
| NM_001363055 | Aspscr1 |  |  |  | YES | YES | YES | YES | chr11:120531786-120535786 |
| NM_026877    | Aspscr1 |  |  |  | YES | YES | YES | YES | chr11:120531786-120535786 |
| NM_001363056 | Aspscr1 |  |  |  | YES | YES | YES | YES | chr11:120532168-120536168 |
| NM_026272    | Narf    |  |  |  | YES | YES | YES | YES | chr11:121096049-121100049 |
| NM_001270988 | Asxl2   |  |  |  | YES | YES | YES | YES | chr12:3424356-3428356     |
| NM_172421    | Asxl2   |  |  |  | YES | YES | YES | YES | chr12:3424356-3428356     |
| NM_001361928 | Hbp1    |  |  |  | YES | YES | YES | YES | chr12:32637610-32633610   |
| NM_153198    | Hbp1    |  |  |  | YES | YES | YES | YES | chr12:32637610-32633610   |
| NM_177993    | Hbp1    |  |  |  | YES | YES | YES | YES | chr12:32637610-32633610   |
| NM_001146176 | Max     |  |  |  | YES | YES | YES | YES | chr12:78065735-78061735   |
| NM_001361664 | Max     |  |  |  | YES | YES | YES | YES | chr12:78065735-78061735   |
| NM_008558    | Max     |  |  |  | YES | YES | YES | YES | chr12:78065735-78061735   |
| NM_001361663 | Max     |  |  |  | YES | YES | YES | YES | chr12:78065735-78061735   |
| NM_134042    | Aldh6a1 |  |  |  | YES | YES | YES | YES | chr12:85794474-85790474   |
| NM_173756    | Lin52   |  |  |  | YES | YES | YES | YES | chr12:85789957-85793957   |
| NM_031391    | Gtf2a1  |  |  |  | YES | YES | YES | YES | chr12:92830589-92826589   |
| NM_175335    | Gtf2a1  |  |  |  | YES | YES | YES | YES | chr12:92831427-92827427   |
| NM_001047159 | Net1    |  |  |  | YES | YES | YES | YES | chr13:3895327-3891327     |
| NM_001081059 | Mcur1   |  |  |  | YES | YES | YES |     | chr13:43658060-43654060   |
| NM_053180    | Cdk20   |  |  |  | YES | YES | YES | YES | chr13:64531360-64535360   |
| NM_053163    | Mrpl36  |  |  |  | YES | YES | YES | YES | chr13:73465956-73469956   |

|              |          |  |  |  |     |     |     |     |                           |
|--------------|----------|--|--|--|-----|-----|-----|-----|---------------------------|
| NM_009874    | Cdk7     |  |  |  | YES | YES | YES | YES | chr13:101503397-101499397 |
| NM_001361085 | Srek1    |  |  |  | YES | YES | YES | YES | chr13:104567188-104563188 |
| NM_026965    | Comtd1   |  |  |  | YES | YES | YES | YES | chr14:22670632-22666632   |
| NM_001134465 | Dennd6a  |  |  |  | YES | YES | YES | YES | chr14:27396535-27400535   |
| NM_145969    | Dennd6a  |  |  |  | YES | YES | YES | YES | chr14:27396535-27400535   |
| NM_008715    | Ints6    |  |  |  | YES | YES | YES | YES | chr14:63382449-63378449   |
| NM_001164503 | Akap11   |  |  |  | YES | YES | YES | YES | chr14:78939167-78935167   |
| NM_145930    | AW549877 |  |  |  | YES | YES | YES | YES | chr15:3948252-3944252     |
| NM_172402    | Slc25a32 |  |  |  | YES | YES | YES | YES | chr15:38946762-38942762   |
| NM_198606    | Dcaf13   |  |  |  | YES | YES | YES | YES | chr15:38941919-38945919   |
| NM_001355589 | Top1mt   |  |  |  | YES | YES | YES | YES | chr15:75511730-75507730   |
| NM_028404    | Top1mt   |  |  |  | YES | YES | YES | YES | chr15:75511730-75507730   |
| NM_001017983 | Foxred2  |  |  |  | YES | YES | YES | YES | chr15:77789652-77785652   |
| NM_001168260 | Foxred2  |  |  |  | YES | YES | YES | YES | chr15:77789652-77785652   |
| NM_001304830 | Maff     |  |  |  | YES | YES | YES | YES | chr15:79174550-79178550   |
| NM_010755    | Maff     |  |  |  | YES | YES | YES | YES | chr15:79175449-79179449   |
| NM_001304831 | Maff     |  |  |  | YES | YES | YES | YES | chr15:79175990-79179990   |
| NM_001304832 | Maff     |  |  |  | YES | YES | YES | YES | chr15:79176331-79180331   |
| NM_133726    | St13     |  |  |  | YES | YES | YES | YES | chr15:81232624-81228624   |
| NM_017376    | Tef      |  |  |  | YES | YES | YES | YES | chr15:81639343-81643343   |
| NM_001111288 | Sco2     |  |  |  | YES | YES | YES | YES | chr15:89206822-89202822   |
| NM_026967    | Rhebl1   |  |  |  | YES | YES | YES | YES | chr15:98714345-98710345   |
| NM_001113545 | Lima1    |  |  |  | YES | YES | YES | YES | chr15:99708387-99704387   |
| NM_145625    | Eif4b    |  |  |  | YES | YES | YES | YES | chr15:101901703-101905703 |
| NM_134100    | Mfsd5    |  |  |  | YES | YES | YES | YES | chr15:102107386-102111386 |
| NM_030205    | Coro7    |  |  |  | YES | YES | YES | YES | chr16:4682220-4678220     |
| NM_001079814 | Glyr1    |  |  |  | YES | YES | YES | YES | chr16:5052503-5048503     |
| NM_028720    | Glyr1    |  |  |  | YES | YES | YES | YES | chr16:5052503-5048503     |
| NM_001359747 | Glyr1    |  |  |  | YES | YES | YES | YES | chr16:5052503-5048503     |
| NM_001359748 | Glyr1    |  |  |  | YES | YES | YES | YES | chr16:5052503-5048503     |
| NM_001356320 | Ubn1     |  |  |  | YES | YES | YES | YES | chr16:5047649-5051649     |
| NM_026666    | Ubn1     |  |  |  | YES | YES | YES | YES | chr16:5047649-5051649     |
| NM_013796    | Nagpa    |  |  |  | YES | YES | YES | YES | chr16:5206605-5202605     |
| NR_027804    | Nagpa    |  |  |  | YES | YES | YES | YES | chr16:5206605-5202605     |

|              |               |  |  |     |     |     |     |                         |
|--------------|---------------|--|--|-----|-----|-----|-----|-------------------------|
| NM_001081400 | 1810013L24Rik |  |  | YES | YES | YES | YES | chr16:8827692-8831692   |
| NM_001110147 | Tnk2          |  |  | YES | YES | YES | YES | chr16:32642228-32646228 |
| NM_016788    | Tnk2          |  |  | YES | YES | YES | YES | chr16:32642228-32646228 |
| NM_175111    | Hspbap1       |  |  | YES | YES | YES | YES | chr16:35767971-35771971 |
| NR_152314    | Hspbap1       |  |  | YES | YES | YES | YES | chr16:35767971-35771971 |
| NM_001358203 | Atp6v1a       |  |  | YES | YES | YES |     | chr16:44141872-44137872 |
| NM_001358204 | Atp6v1a       |  |  | YES | YES | YES |     | chr16:44141872-44137872 |
| NM_007508    | Atp6v1a       |  |  | YES | YES | YES |     | chr16:44141872-44137872 |
| NM_001347239 | Naa50         |  |  | YES | YES | YES |     | chr16:44137403-44141403 |
| NM_028108    | Naa50         |  |  | YES | YES | YES |     | chr16:44137421-44141421 |
| NM_001356453 | Slc35a5       |  |  | YES | YES | YES | YES | chr16:45161286-45157286 |
| NM_028756    | Slc35a5       |  |  | YES | YES | YES | YES | chr16:45161286-45157286 |
| NM_172935    | Amdhd2        |  |  | YES | YES | YES | YES | chr17:24303200-24299200 |
| NM_023480    | Fahd1         |  |  | YES | YES | YES | YES | chr17:24989747-24985747 |
| NM_024284    | Hagh          |  |  | YES | YES | YES | YES | chr17:24984934-24988934 |
| NM_001159626 | Hagh          |  |  | YES | YES | YES | YES | chr17:24985111-24989111 |
| NM_013642    | Dusp1         |  |  | YES | YES | YES | YES | chr17:26647917-26643917 |
| NM_029870    | Crebrf        |  |  | YES | YES | YES | YES | chr17:26850094-26854094 |
| NM_026307    | Cuta          |  |  | YES | YES | YES | YES | chr17:27078983-27074983 |
| NM_026948    | Cuta          |  |  | YES | YES | YES | YES | chr17:27078983-27074983 |
| NR_104458    | Cuta          |  |  | YES | YES | YES | YES | chr17:27078903-27074903 |
| NM_001281491 | Syngap1       |  |  | YES | YES | YES | YES | chr17:27075896-27079896 |
| NM_001109913 | Hnrnpm        |  |  | YES | YES | YES | YES | chr17:33824903-33820903 |
| NM_029804    | Hnrnpm        |  |  | YES | YES | YES | YES | chr17:33824903-33820903 |
| NM_021346    | Zfp318        |  |  | YES | YES | YES | YES | chr17:46518214-46522214 |
| NM_207671    | Zfp318        |  |  | YES | YES | YES | YES | chr17:46518214-46522214 |
| NM_025887    | Rab5a         |  |  | YES | YES | YES | YES | chr17:53616058-53620058 |
| NM_028782    | Lonp1         |  |  | YES | YES | YES | YES | chr17:56768826-56764826 |
| NM_001357897 | Catsperd      |  |  | YES | YES | YES | YES | chr17:56763969-56767969 |
| NM_175350    | Catsperd      |  |  | YES | YES | YES | YES | chr17:56765065-56769065 |
| NM_025538    | Alkbh7        |  |  | YES | YES | YES | YES | chr17:57134261-57138261 |
| NM_027372    | Alkbh7        |  |  | YES | YES | YES | YES | chr17:57134261-57138261 |
| NM_011104    | Prkce         |  |  | YES | YES | YES | YES | chr17:86564624-86568624 |
| NM_019654    | Socs5         |  |  | YES | YES | YES | YES | chr17:87504518-87508518 |

|              |               |  |  |  |     |     |     |     |                         |
|--------------|---------------|--|--|--|-----|-----|-----|-----|-------------------------|
| NM_001039692 | Arhgap12      |  |  |  | YES | YES | YES | YES | chr18:6138596-6134596   |
| NM_029277    | Arhgap12      |  |  |  | YES | YES | YES | YES | chr18:6138596-6134596   |
| NM_027497    | Epc1          |  |  |  | YES | YES | YES | YES | chr18:6493355-6489355   |
| NM_001276350 | Epc1          |  |  |  | YES | YES | YES | YES | chr18:6493355-6489355   |
| NM_146084    | Fam13b        |  |  |  | YES | YES | YES | YES | chr18:34668977-34664977 |
| NM_175375    | Ankhd1        |  |  |  | YES | YES | YES | YES | chr18:36717756-36721756 |
| NM_001357462 | Dctn4         |  |  |  | YES | YES | YES | YES | chr18:60683307-60687307 |
| NM_026302    | Dctn4         |  |  |  | YES | YES | YES | YES | chr18:60683307-60687307 |
| NM_026316    | Aldh3b1       |  |  |  | YES | YES | YES |     | chr19:3932278-3928278   |
| NM_011237    | Rad9a         |  |  |  | YES | YES | YES | YES | chr19:4204103-4200103   |
| NM_001162946 | Pcx           |  |  |  | YES | YES | YES | YES | chr19:4507971-4511971   |
| NM_001362044 | Ubxn1         |  |  |  | YES | YES | YES | YES | chr19:8943537-8947537   |
| NM_146093    | Ubxn1         |  |  |  | YES | YES | YES | YES | chr19:8943537-8947537   |
| NM_001361971 | Lpxn          |  |  |  | YES | YES | YES | YES | chr19:12868182-12872182 |
| NM_025423    | 1110059E24Rik |  |  |  | YES | YES | YES | YES | chr19:21729781-21725781 |
| NM_146096    | Abhd17b       |  |  |  | YES | YES | YES | YES | chr19:21725298-21729298 |
| NM_028152    | Mms19         |  |  |  | YES | YES | YES | YES | chr19:42058126-42054126 |
| NM_145500    | Ubt1          |  |  |  | YES | YES | YES | YES | chr19:42053752-42057752 |
| NM_026152    | Hoga1         |  |  |  | YES | YES | YES | YES | chr19:42117859-42121859 |
| NM_001346703 | Hps1          |  |  |  | YES | YES | YES | YES | chr19:42856968-42852968 |
| NM_019424    | Hps1          |  |  |  | YES | YES | YES | YES | chr19:42856968-42852968 |
| NM_001362410 | Hps1          |  |  |  | YES | YES | YES | YES | chr19:42855636-42851636 |
| NM_145503    | Lzts2         |  |  |  | YES | YES | YES | YES | chr19:45087165-45091165 |
| NM_001130525 | Lzts2         |  |  |  | YES | YES | YES | YES | chr19:45087199-45091199 |
| NM_001130526 | Lzts2         |  |  |  | YES | YES | YES |     | chr19:45090124-45094124 |
| NM_001102471 | Cnm2          |  |  |  | YES | YES | YES | YES | chr19:46833598-46837598 |
| NM_033569    | Cnm2          |  |  |  | YES | YES | YES | YES | chr19:46833598-46837598 |
| NM_001356986 | Smndc1        |  |  |  | YES | YES | YES | YES | chr19:53467031-53463031 |
| NM_172429    | Smndc1        |  |  |  | YES | YES | YES | YES | chr19:53467624-53463624 |
| NM_001172096 | Cacul1        |  |  |  | YES | YES | YES | YES | chr19:60659426-60655426 |
| NM_001172097 | Cacul1        |  |  |  | YES | YES | YES | YES | chr19:60659426-60655426 |
| NM_030197    | Cacul1        |  |  |  | YES | YES | YES | YES | chr19:60659426-60655426 |
| NM_177648    | Dolk          |  |  |  | YES | YES | YES | YES | chr2:30144374-30140374  |
| NM_198304    | Nup188        |  |  |  | YES | YES | YES | YES | chr2:30139435-30143435  |

|              |               |  |  |  |     |     |     |     |                          |
|--------------|---------------|--|--|--|-----|-----|-----|-----|--------------------------|
| NR_156132    | Nup188        |  |  |  | YES | YES | YES | YES | chr2:30139435-30143435   |
| NM_001252536 | Ciz1          |  |  |  | YES | YES | YES |     | chr2:32216029-32220029   |
| NM_001252538 | Ciz1          |  |  |  | YES | YES | YES |     | chr2:32216029-32220029   |
| NM_001252534 | Ciz1          |  |  |  | YES | YES | YES |     | chr2:32216217-32220217   |
| NM_001252537 | Ciz1          |  |  |  | YES | YES | YES |     | chr2:32216217-32220217   |
| NM_028412    | Ciz1          |  |  |  | YES | YES | YES |     | chr2:32216217-32220217   |
| NM_029774    | Ttll11        |  |  |  | YES | YES | YES | YES | chr2:35837644-35833644   |
| NM_018828    | Fnbp4         |  |  |  | YES | YES | YES |     | chr2:90583026-90587026   |
| NM_001317241 | Mtch2         |  |  |  | YES | YES | YES | YES | chr2:90684811-90688811   |
| NM_001317242 | Mtch2         |  |  |  | YES | YES | YES | YES | chr2:90684811-90688811   |
| NM_001317243 | Mtch2         |  |  |  | YES | YES | YES | YES | chr2:90684811-90688811   |
| NM_001317244 | Mtch2         |  |  |  | YES | YES | YES | YES | chr2:90684811-90688811   |
| NM_019758    | Mtch2         |  |  |  | YES | YES | YES | YES | chr2:90684811-90688811   |
| NM_001290837 | Serf2         |  |  |  | YES | YES | YES | YES | chr2:121272433-121276433 |
| NM_011354    | Serf2         |  |  |  | YES | YES | YES | YES | chr2:121272433-121276433 |
| NR_110986    | Serf2         |  |  |  | YES | YES | YES | YES | chr2:121272433-121276433 |
| NM_001291144 | Dhx35         |  |  |  | YES | YES | YES | YES | chr2:158618042-158622042 |
| NM_145742    | Dhx35         |  |  |  | YES | YES | YES | YES | chr2:158618042-158622042 |
| NM_001085495 | Arfgef2       |  |  |  | YES | YES | YES | YES | chr2:166628580-166632580 |
| NM_001311131 | Ube2v1        |  |  |  | YES | YES | YES |     | chr2:167460005-167456005 |
| NM_001311146 | Ube2v1        |  |  |  | YES | YES | YES |     | chr2:167460005-167456005 |
| NM_023230    | Ube2v1        |  |  |  | YES | YES | YES |     | chr2:167460005-167456005 |
| NM_177586    | Eif5a2        |  |  |  | YES | YES | YES | YES | chr3:28677698-28681698   |
| NM_025813    | Mfsd1         |  |  |  | YES | YES | YES | YES | chr3:67384189-67388189   |
| NM_001309909 | Scamp3        |  |  |  | YES | YES | YES | YES | chr3:88978812-88982812   |
| NM_001309910 | Scamp3        |  |  |  | YES | YES | YES | YES | chr3:88978812-88982812   |
| NM_011886    | Scamp3        |  |  |  | YES | YES | YES | YES | chr3:88978812-88982812   |
| NM_027315    | Ube2q1        |  |  |  | YES | YES | YES | YES | chr3:89575030-89579030   |
| NM_001287086 | 4933434E20Rik |  |  |  | YES | YES | YES | YES | chr3:89854223-89858223   |
| NM_025762    | 4933434E20Rik |  |  |  | YES | YES | YES | YES | chr3:89854223-89858223   |
| NM_027500    | 4933434E20Rik |  |  |  | YES | YES | YES | YES | chr3:89854223-89858223   |
| NM_001293707 | Pip5k1a       |  |  |  | YES | YES | YES | YES | chr3:94913352-94909352   |
| NM_008847    | Pip5k1a       |  |  |  | YES | YES | YES | YES | chr3:94913352-94909352   |
| NM_001009935 | Txnip         |  |  |  | YES | YES | YES | YES | chr3:96359379-96363379   |



|              |         |  |  |  |     |     |     |     |                          |
|--------------|---------|--|--|--|-----|-----|-----|-----|--------------------------|
| NM_023719    | Txnip   |  |  |  | YES | YES | YES | YES | chr3:96359379-96363379   |
| NM_001161854 | Csde1   |  |  |  | YES | YES | YES | YES | chr3:102821968-102825968 |
| NM_001310693 | Csde1   |  |  |  | YES | YES | YES | YES | chr3:102821968-102825968 |
| NM_144901    | Csde1   |  |  |  | YES | YES | YES | YES | chr3:102821968-102825968 |
| NM_001045807 | Rbm15   |  |  |  | YES | YES | YES | YES | chr3:107138707-107134707 |
| NM_001316995 | H2afz   |  |  |  | YES | YES | YES | YES | chr3:137524950-137528950 |
| NM_016750    | H2afz   |  |  |  | YES | YES | YES | YES | chr3:137524950-137528950 |
| NM_007917    | Eif4e   |  |  |  | YES | YES | YES | YES | chr3:138186654-138190654 |
| NM_001313980 | Eif4e   |  |  |  | YES | YES | YES | YES | chr3:138187731-138191731 |
| NM_145546    | Gtf2b   |  |  |  | YES | YES | YES |     | chr3:142425710-142429710 |
| NM_001346655 | Zzz3    |  |  |  | YES |     | YES | YES | chr3:152055936-152059936 |
| NM_001080755 | Zzz3    |  |  |  | YES | YES | YES | YES | chr3:152056466-152060466 |
| NM_001355673 | Zzz3    |  |  |  | YES | YES | YES | YES | chr3:152056466-152060466 |
| NM_001287139 | Zzz3    |  |  |  | YES | YES | YES | YES | chr3:152057147-152061147 |
| NM_175175    | Plekhf2 |  |  |  | YES | YES | YES |     | chr4:10937266-10933266   |
| NM_013889    | Zfp292  |  |  |  | YES | YES | YES | YES | chr4:34832697-34828697   |
| NM_134097    | Topors  |  |  |  | YES | YES | YES | YES | chr4:40219374-40215374   |
| NM_001290448 | Nfx1    |  |  |  | YES | YES | YES | YES | chr4:40915438-40919438   |
| NM_001290449 | Nfx1    |  |  |  | YES | YES | YES | YES | chr4:40915438-40919438   |
| NM_023739    | Nfx1    |  |  |  | YES | YES | YES | YES | chr4:40915475-40919475   |
| NM_172694    | Megf9   |  |  |  | YES | YES | YES | YES | chr4:70198462-70194462   |
| NM_001356561 | Kdm4c   |  |  |  | YES | YES | YES | YES | chr4:73895282-73899282   |
| NM_144787    | Kdm4c   |  |  |  | YES | YES | YES | YES | chr4:73895282-73899282   |
| NM_028132    | Pgm2    |  |  |  | YES | YES | YES | YES | chr4:99599555-99603555   |
| NM_027250    | Coa7    |  |  |  | YES | YES | YES | YES | chr4:107998256-108002256 |
| NM_007983    | Faf1    |  |  |  | YES | YES | YES | YES | chr4:109346731-109350731 |
| NM_009478    | Urod    |  |  |  | YES | YES | YES | YES | chr4:116669518-116665518 |
| NM_175244    | Hectd3  |  |  |  | YES | YES | YES | YES | chr4:116665438-116669438 |
| NM_033617    | Atp6v0b |  |  |  | YES | YES | YES | YES | chr4:117562434-117558434 |
| NM_001355214 | Ppcs    |  |  |  | YES | YES | YES | YES | chr4:119097525-119093525 |
| NM_026494    | Ppcs    |  |  |  | YES | YES | YES | YES | chr4:119097525-119093525 |
| NM_001014900 | Zmynd12 |  |  |  | YES | YES | YES | YES | chr4:119092788-119096788 |
| NM_001346660 | Rlf     |  |  |  | YES | YES | YES | YES | chr4:120890189-120886189 |
| NM_009030    | Rbbp4   |  |  |  | YES | YES | YES | YES | chr4:129015114-129011114 |

|              |          |  |  |  |     |     |     |     |                          |
|--------------|----------|--|--|--|-----|-----|-----|-----|--------------------------|
| NM_025970    | Zbtb8os  |  |  |  | YES | YES | YES | YES | chr4:129010769-129014769 |
| NR_045036    | Khdrbs1  |  |  |  | YES | YES | YES | YES | chr4:129422047-129418047 |
| NM_011317    | Khdrbs1  |  |  |  | YES | YES | YES | YES | chr4:129422047-129418047 |
| NM_019641    | Stmn1    |  |  |  | YES | YES | YES | YES | chr4:134021734-134025734 |
| NM_198248    | Zbtb40   |  |  |  | YES | YES | YES | YES | chr4:136607110-136603110 |
| NM_172338    | Dnajc16  |  |  |  | YES | YES | YES | YES | chr4:141349059-141345059 |
| NM_011929    | Clcn6    |  |  |  | YES | YES | YES | YES | chr4:147415422-147411422 |
| NM_010840    | Mthfr    |  |  |  | YES | YES | YES | YES | chr4:147410685-147414685 |
| NM_022022    | Ube4b    |  |  |  | YES | YES | YES | YES | chr4:148803240-148799240 |
| NM_026984    | Kmt2e    |  |  |  | YES | YES | YES | YES | chr5:22937781-22941781   |
| NM_153526    | Insig1   |  |  |  | YES | YES | YES | YES | chr5:28395451-28399451   |
| NM_001360000 | Zfp512   |  |  |  | YES | YES | YES | YES | chr5:31752308-31756308   |
| NM_001360001 | Zfp512   |  |  |  | YES | YES | YES | YES | chr5:31752308-31756308   |
| NM_172993    | Zfp512   |  |  |  | YES | YES | YES | YES | chr5:31752308-31756308   |
| NM_001113460 | Tec      |  |  |  | YES | YES | YES |     | chr5:73262187-73258187   |
| NM_001113461 | Tec      |  |  |  | YES | YES | YES |     | chr5:73262187-73258187   |
| NM_001113464 | Tec      |  |  |  | YES | YES | YES |     | chr5:73262187-73258187   |
| NM_013689    | Tec      |  |  |  | YES | YES | YES |     | chr5:73262187-73258187   |
| NM_001081107 | Helq     |  |  |  | YES | YES | YES | YES | chr5:101230119-101226119 |
| NM_026826    | Mrps18c  |  |  |  | YES | YES | YES | YES | chr5:101225277-101229277 |
| NM_028794    | Nudt9    |  |  |  | YES | YES | YES | YES | chr5:104473382-104477382 |
| NM_001081203 | Sbno1    |  |  |  | YES | YES | YES | YES | chr5:124878466-124874466 |
| NM_001359978 | Sbno1    |  |  |  | YES | YES | YES | YES | chr5:124878111-124874111 |
| NM_001359979 | Sbno1    |  |  |  | YES | YES | YES | YES | chr5:124878111-124874111 |
| NM_011639    | Trip6    |  |  |  | YES | YES | YES | YES | chr5:137757969-137753969 |
| NM_010312    | Gnb2     |  |  |  | YES | YES | YES | YES | chr5:137977034-137973034 |
| NM_001356576 | Mcm7     |  |  |  | YES | YES | YES | YES | chr5:138614994-138610994 |
| NM_001356577 | Mcm7     |  |  |  | YES | YES | YES | YES | chr5:138614994-138610994 |
| NM_008568    | Mcm7     |  |  |  | YES | YES | YES | YES | chr5:138615611-138611611 |
| NM_021392    | Ap4m1    |  |  |  | YES | YES | YES | YES | chr5:138610748-138614748 |
| NM_133916    | Eif3b    |  |  |  | YES | YES | YES |     | chr5:140892758-140896758 |
| NM_001177572 | Slc25a13 |  |  |  | YES | YES | YES | YES | chr6:6169673-6165673     |
| NM_015829    | Slc25a13 |  |  |  | YES | YES | YES | YES | chr6:6169673-6165673     |
| NM_001171000 | Ahcyl2   |  |  |  | YES | YES | YES | YES | chr6:29715942-29719942   |

|              |          |  |  |  |     |     |     |     |                          |
|--------------|----------|--|--|--|-----|-----|-----|-----|--------------------------|
| NM_021414    | Ahcyl2   |  |  |  | YES | YES | YES | YES | chr6:29715942-29719942   |
| NM_001361617 | Slc37a3  |  |  |  | YES | YES | YES | YES | chr6:39330206-39326206   |
| NM_001361618 | Slc37a3  |  |  |  | YES | YES | YES | YES | chr6:39330206-39326206   |
| NM_001361619 | Slc37a3  |  |  |  | YES | YES | YES | YES | chr6:39330206-39326206   |
| NM_028123    | Slc37a3  |  |  |  | YES | YES | YES | YES | chr6:39330206-39326206   |
| NR_155076    | Slc37a3  |  |  |  | YES | YES | YES | YES | chr6:39329934-39325934   |
| NR_155077    | Slc37a3  |  |  |  | YES | YES | YES | YES | chr6:39330206-39326206   |
| NM_001355668 | Klf15    |  |  |  | YES | YES | YES | YES | chr6:90410069-90414069   |
| NM_023184    | Klf15    |  |  |  | YES | YES | YES | YES | chr6:90410069-90414069   |
| NM_001164089 | Cops7a   |  |  |  | YES | YES | YES | YES | chr6:124918056-124914056 |
| NM_001355541 | Cops7a   |  |  |  | YES | YES | YES | YES | chr6:124918056-124914056 |
| NM_001355542 | Cops7a   |  |  |  | YES | YES | YES | YES | chr6:124918056-124914056 |
| NM_012003    | Cops7a   |  |  |  | YES | YES | YES | YES | chr6:124918056-124914056 |
| NM_019426    | Atf7ip   |  |  |  | YES | YES | YES | YES | chr6:136464871-136468871 |
| NM_025898    | Napa     |  |  |  | YES | YES | YES | YES | chr7:16681428-16685428   |
| NM_001285891 | Sae1     |  |  |  | YES | YES | YES | YES | chr7:16975745-16971745   |
| NM_001285892 | Sae1     |  |  |  | YES | YES | YES | YES | chr7:16975745-16971745   |
| NM_019748    | Sae1     |  |  |  | YES | YES | YES | YES | chr7:16975745-16971745   |
| NM_001243888 | BC024978 |  |  |  | YES | YES | YES | YES | chr7:27978299-27982299   |
| NM_001290511 | BC024978 |  |  |  | YES | YES | YES | YES | chr7:27978299-27982299   |
| NM_001290513 | BC024978 |  |  |  | YES | YES | YES | YES | chr7:27978299-27982299   |
| NM_001037957 | Dyrk1b   |  |  |  | YES | YES | YES | YES | chr7:28962001-28966001   |
| NM_010092    | Dyrk1b   |  |  |  | YES | YES | YES | YES | chr7:28962001-28966001   |
| NM_001271370 | Dyrk1b   |  |  |  | YES | YES | YES | YES | chr7:28962834-28966834   |
| NM_001357668 | Yif1b    |  |  |  | YES |     | YES | YES | chr7:30020112-30024112   |
| NM_001110201 | Yif1b    |  |  |  | YES | YES | YES | YES | chr7:30020841-30024841   |
| NM_029887    | Yif1b    |  |  |  | YES | YES | YES | YES | chr7:30020841-30024841   |
| NM_001357664 | Yif1b    |  |  |  | YES | YES | YES | YES | chr7:30020975-30024975   |
| NM_001357666 | Yif1b    |  |  |  | YES | YES | YES | YES | chr7:30020975-30024975   |
| NM_009438    | Rpl13a   |  |  |  | YES | YES | YES | YES | chr7:52386615-52382615   |
| NM_007527    | Bax      |  |  |  | YES | YES | YES | YES | chr7:52724768-52720768   |
| NM_001005247 | Hps5     |  |  |  | YES | YES | YES | YES | chr7:54053751-54049751   |
| NM_001005248 | Hps5     |  |  |  | YES | YES | YES | YES | chr7:54053751-54049751   |
| NM_001167864 | Hps5     |  |  |  | YES | YES | YES | YES | chr7:54053751-54049751   |

|              |          |  |  |  |     |     |     |     |                          |
|--------------|----------|--|--|--|-----|-----|-----|-----|--------------------------|
| NM_001360076 | Gtf2h1   |  |  |  | YES | YES | YES | YES | chr7:54048963-54052963   |
| NM_008186    | Gtf2h1   |  |  |  | YES | YES | YES | YES | chr7:54048963-54052963   |
| NM_001291075 | Gtf2h1   |  |  |  | YES | YES | YES | YES | chr7:54049540-54053540   |
| NM_001360075 | Gtf2h1   |  |  |  | YES | YES | YES | YES | chr7:54049540-54053540   |
| NM_133740    | Prmt3    |  |  |  | YES | YES | YES | YES | chr7:57031227-57035227   |
| NM_001252520 | Picalm   |  |  |  | YES | YES | YES | YES | chr7:97276222-97280222   |
| NM_001252521 | Picalm   |  |  |  | YES | YES | YES | YES | chr7:97276222-97280222   |
| NM_001252522 | Picalm   |  |  |  | YES | YES | YES | YES | chr7:97276222-97280222   |
| NM_001252523 | Picalm   |  |  |  | YES | YES | YES | YES | chr7:97276222-97280222   |
| NM_001252524 | Picalm   |  |  |  | YES | YES | YES | YES | chr7:97276222-97280222   |
| NM_001360867 | Picalm   |  |  |  | YES | YES | YES | YES | chr7:97276222-97280222   |
| NM_146194    | Picalm   |  |  |  | YES | YES | YES | YES | chr7:97276222-97280222   |
| NM_026734    | Tmem126b |  |  |  | YES | YES | YES | YES | chr7:97627005-97623005   |
| NM_001081679 | Tomt     |  |  |  | YES | YES | YES | YES | chr7:109057373-109053373 |
| NM_001282088 | Tomt     |  |  |  | YES | YES | YES | YES | chr7:109054799-109050799 |
| NM_011247    | Rbbp6    |  |  |  | YES | YES | YES | YES | chr7:130111577-130115577 |
| NM_175023    | Rbbp6    |  |  |  | YES | YES | YES | YES | chr7:130111577-130115577 |
| NM_023712    | Spns1    |  |  |  | YES | YES | YES | YES | chr7:133523948-133519948 |
| NR_045537    | Spns1    |  |  |  | YES | YES | YES | YES | chr7:133523948-133519948 |
| NM_001029982 | Sec23ip  |  |  |  | YES | YES | YES | YES | chr7:135885883-135889883 |
| NM_011592    | Timm44   |  |  |  | YES | YES | YES | YES | chr8:4278405-4274405     |
| NM_023662    | Pcm1     |  |  |  | YES | YES | YES |     | chr8:42322612-42326612   |
| NM_001363117 | Ddx39    |  |  |  | YES | YES | YES | YES | chr8:86236575-86240575   |
| NM_197982    | Ddx39    |  |  |  | YES | YES | YES | YES | chr8:86236575-86240575   |
| NR_156447    | Ddx39    |  |  |  | YES | YES | YES | YES | chr8:86236575-86240575   |
| NM_001363116 | Ddx39    |  |  |  | YES | YES | YES | YES | chr8:86236972-86240972   |
| NM_001039514 | Dhps     |  |  |  | YES | YES | YES | YES | chr8:87593155-87597155   |
| NM_172758    | Slc38a7  |  |  |  | YES | YES | YES | YES | chr8:98379891-98375891   |
| NM_001024606 | Pdp2     |  |  |  | YES | YES | YES | YES | chr8:107112867-107116867 |
| NM_013477    | Atp6v0d1 |  |  |  | YES | YES | YES | YES | chr8:108092464-108088464 |
| NM_146216    | Vac14    |  |  |  | YES | YES | YES | YES | chr8:113139966-113143966 |
| NR_151674    | Vac14    |  |  |  | YES | YES | YES | YES | chr8:113139966-113143966 |
| NR_151675    | Vac14    |  |  |  | YES | YES | YES | YES | chr8:113139966-113143966 |
| NM_026844    | Cmc2     |  |  |  | YES | YES | YES | YES | chr8:119447836-119443836 |

|              |               |  |  |  |     |     |     |     |                          |
|--------------|---------------|--|--|--|-----|-----|-----|-----|--------------------------|
| NM_001163761 | 6430548M08Rik |  |  |  | YES | YES | YES | YES | chr8:122635551-122639551 |
| NM_001163762 | 6430548M08Rik |  |  |  | YES | YES | YES | YES | chr8:122635551-122639551 |
| NM_172286    | 6430548M08Rik |  |  |  | YES | YES | YES | YES | chr8:122635551-122639551 |
| NM_024214    | Tomm20        |  |  |  | YES | YES | YES | YES | chr8:129472321-129468321 |
| NM_001039824 | Fdx1l         |  |  |  | YES | YES | YES | YES | chr9:20880475-20876475   |
| NR_157201    | Fdx1l         |  |  |  | YES | YES | YES | YES | chr9:20880475-20876475   |
| NR_157202    | Fdx1l         |  |  |  | YES | YES | YES | YES | chr9:20880475-20876475   |
| NR_157203    | Fdx1l         |  |  |  | YES | YES | YES | YES | chr9:20880475-20876475   |
| NR_157204    | Fdx1l         |  |  |  | YES | YES | YES | YES | chr9:20880475-20876475   |
| NM_001042707 | lfl3          |  |  |  | YES | YES | YES | YES | chr9:21169814-21173814   |
| NM_001042708 | lfl3          |  |  |  | YES | YES | YES | YES | chr9:21169814-21173814   |
| NM_001042709 | lfl3          |  |  |  | YES | YES | YES | YES | chr9:21169814-21173814   |
| NM_001277321 | lfl3          |  |  |  | YES | YES | YES | YES | chr9:21169814-21173814   |
| NM_010561    | lfl3          |  |  |  | YES | YES | YES | YES | chr9:21169814-21173814   |
| NM_001277322 | lfl3          |  |  |  | YES | YES | YES | YES | chr9:21170475-21174475   |
| NM_145611    | Kank2         |  |  |  | YES | YES | YES | YES | chr9:21605490-21601490   |
| NM_001163787 | Ccdc151       |  |  |  | YES | YES | YES | YES | chr9:21809578-21805578   |
| NM_029939    | Ccdc151       |  |  |  | YES | YES | YES | YES | chr9:21809578-21805578   |
| NM_001293650 | Prkcsh        |  |  |  | YES | YES | YES | YES | chr9:21804931-21808931   |
| NM_001293651 | Prkcsh        |  |  |  | YES | YES | YES | YES | chr9:21804931-21808931   |
| NM_008925    | Prkcsh        |  |  |  | YES | YES | YES | YES | chr9:21804931-21808931   |
| NM_173038    | Tbcel         |  |  |  | YES | YES | YES | YES | chr9:42282841-42278841   |
| NM_027498    | Sik3          |  |  |  | YES | YES | YES | YES | chr9:45818402-45822402   |
| NM_001359739 | Usp28         |  |  |  | YES | YES | YES | YES | chr9:48790989-48794989   |
| NM_175482    | Usp28         |  |  |  | YES | YES | YES | YES | chr9:48790989-48794989   |
| NM_001161618 | Cul5          |  |  |  | YES | YES | YES | YES | chr9:53478112-53474112   |
| NM_027807    | Cul5          |  |  |  | YES | YES | YES | YES | chr9:53478112-53474112   |
| NM_025417    | Commd4        |  |  |  | YES | YES | YES | YES | chr9:57008606-57004606   |
| NM_138584    | Spg21         |  |  |  | YES | YES | YES | YES | chr9:65306243-65310243   |
| NM_001357813 | Spg21         |  |  |  | YES | YES | YES | YES | chr9:65308007-65312007   |
| NM_007399    | Adam10        |  |  |  | YES | YES | YES | YES | chr9:70524288-70528288   |
| NM_001359816 | Fam214a       |  |  |  | YES | YES | YES | YES | chr9:74798186-74802186   |
| NR_153342    | Fam214a       |  |  |  | YES | YES | YES | YES | chr9:74798186-74802186   |
| NM_001113283 | Fam214a       |  |  |  | YES | YES | YES | YES | chr9:74798359-74802359   |

|              |         |  |  |     |     |     |     |     |                           |
|--------------|---------|--|--|-----|-----|-----|-----|-----|---------------------------|
| NM_001114977 | U2surp  |  |  |     | YES | YES | YES | YES | chr9:95414915-95410915    |
| NM_001357974 | U2surp  |  |  |     | YES | YES | YES | YES | chr9:95414915-95410915    |
| NM_001357975 | U2surp  |  |  |     | YES | YES | YES | YES | chr9:95414915-95410915    |
| NM_001357976 | U2surp  |  |  |     | YES | YES | YES | YES | chr9:95414915-95410915    |
| NM_001357977 | U2surp  |  |  |     | YES | YES | YES | YES | chr9:95414915-95410915    |
| NM_026476    | U2surp  |  |  |     | YES | YES | YES | YES | chr9:95414915-95410915    |
| NM_153459    | Dusp7   |  |  |     | YES | YES | YES | YES | chr9:106268462-106272462  |
| NM_013785    | Ip6k1   |  |  |     | YES | YES | YES | YES | chr9:107902478-107906478  |
| NM_001329527 | Gpx1    |  |  |     | YES | YES | YES | YES | chr9:108238910-108242910  |
| NM_001329528 | Gpx1    |  |  |     | YES | YES | YES | YES | chr9:108238910-108242910  |
| NM_008160    | Gpx1    |  |  |     | YES | YES | YES | YES | chr9:108238910-108242910  |
| NM_001109757 | Atp7a   |  |  |     | YES | YES | YES | YES | chrX:103220062-103224062  |
| NM_009726    | Atp7a   |  |  |     | YES | YES | YES | YES | chrX:103220062-103224062  |
| NM_001146081 | Fancb   |  |  |     | YES | YES | YES |     | chrX:161416023-161420023  |
| NM_175027    | Fancb   |  |  |     | YES | YES | YES |     | chrX:161416023-161420023  |
| NM_011065    | Per1    |  |  | YES |     | YES | YES | YES | chr11:68909950-68913950   |
| NM_001159367 | Per1    |  |  | YES |     | YES | YES | YES | chr11:68911153-68915153   |
| NM_001291268 | Hnf1b   |  |  | YES |     | YES | YES | YES | chr11:83661870-83665870   |
| NM_009330    | Hnf1b   |  |  | YES |     | YES | YES | YES | chr11:83661870-83665870   |
| NM_001291269 | Hnf1b   |  |  | YES |     | YES | YES | YES | chr11:83663961-83667961   |
| NM_001347600 | Fbxl3   |  |  | YES |     | YES | YES | YES | chr14:103501283-103497283 |
| NM_001347601 | Fbxl3   |  |  | YES |     | YES | YES | YES | chr14:103500721-103496721 |
| NM_001360341 | Fbxl3   |  |  | YES |     | YES | YES | YES | chr14:103500721-103496721 |
| NM_001360342 | Fbxl3   |  |  | YES |     | YES | YES | YES | chr14:103501283-103497283 |
| NM_015822    | Fbxl3   |  |  | YES |     | YES | YES | YES | chr14:103501249-103497249 |
| NM_027060    | Btdb9   |  |  | YES |     | YES | YES | YES | chr17:30715732-30711732   |
| NM_172618    | Btdb9   |  |  | YES |     | YES | YES | YES | chr17:30715732-30711732   |
| NM_008960    | Pten    |  |  | YES |     | YES | YES | YES | chr19:32829566-32833566   |
| NM_009408    | Top1    |  |  | YES |     | YES | YES | YES | chr2:160469132-160473132  |
| NM_001033302 | Ciart   |  |  | YES |     | YES | YES | YES | chr3:95688651-95684651    |
| NM_013668    | Kdm5c   |  |  | YES |     | YES | YES | YES | chrX:148665269-148669269  |
| NM_183028    | Pcmdt1  |  |  |     |     | YES | YES | YES | chr1:7076500-7080500      |
| NM_011200    | Ptp4a1  |  |  |     |     | YES | YES | YES | chr1:31009100-31005100    |
| NR_002688    | Gm13363 |  |  |     |     | YES | YES | YES | chr1:31009055-31005055    |

|              |               |  |  |  |  |     |     |     |                        |
|--------------|---------------|--|--|--|--|-----|-----|-----|------------------------|
| NM_172054    | Txndc9        |  |  |  |  | YES | YES |     | chr1:38056553-38052553 |
| NM_198303    | Eif5b         |  |  |  |  | YES | YES |     | chr1:38052354-38056354 |
| NM_001039710 | Coq10b        |  |  |  |  | YES | YES | YES | chr1:55107113-55111113 |
| NM_026424    | Coq10b        |  |  |  |  | YES | YES | YES | chr1:55107113-55111113 |
| NR_038009    | 2810408111Rik |  |  |  |  | YES | YES |     | chr1:64739733-64735733 |
| NM_001111320 | ldh1          |  |  |  |  | YES | YES | YES | chr1:65235553-65231553 |
| NM_026195    | Atic          |  |  |  |  | YES | YES | YES | chr1:71601229-71605229 |
| NM_001356516 | Pecr          |  |  |  |  | YES | YES | YES | chr1:72333395-72329395 |
| NM_023523    | Pecr          |  |  |  |  | YES | YES | YES | chr1:72333395-72329395 |
| NM_175564    | Tmem169       |  |  |  |  | YES | YES | YES | chr1:72328446-72332446 |
| NM_024264    | Cyp27a1       |  |  |  |  | YES | YES | YES | chr1:74757608-74761608 |
| NM_001305231 | Retreg2       |  |  |  |  | YES | YES | YES | chr1:75136859-75140859 |
| NM_170755    | Retreg2       |  |  |  |  | YES | YES | YES | chr1:75136859-75140859 |
| NM_001305232 | Retreg2       |  |  |  |  | YES | YES | YES | chr1:75137231-75141231 |
| NM_001313723 | Tuba4a        |  |  |  |  | YES | YES | YES | chr1:75218369-75214369 |
| NM_001313724 | Tuba4a        |  |  |  |  | YES | YES | YES | chr1:75218369-75214369 |
| NM_009447    | Tuba4a        |  |  |  |  | YES | YES | YES | chr1:75218369-75214369 |
| NM_001278075 | Farsb         |  |  |  |  | YES | YES | YES | chr1:78487972-78483972 |
| NM_011811    | Farsb         |  |  |  |  | YES | YES | YES | chr1:78487972-78483972 |
| NR_102757    | Farsb         |  |  |  |  | YES | YES | YES | chr1:78487972-78483972 |
| NR_102758    | Farsb         |  |  |  |  | YES | YES | YES | chr1:78487972-78483972 |
| NM_001313728 | Cul3          |  |  |  |  | YES | YES | YES | chr1:80339765-80335765 |
| NM_016716    | Cul3          |  |  |  |  | YES | YES | YES | chr1:80339765-80335765 |
| NM_001310713 | Agfg1         |  |  |  |  | YES | YES |     | chr1:82833534-82837534 |
| NM_001347077 | Agfg1         |  |  |  |  | YES | YES |     | chr1:82833534-82837534 |
| NM_010472    | Agfg1         |  |  |  |  | YES | YES |     | chr1:82833534-82837534 |
| NR_015507    | C130036L24Rik |  |  |  |  | YES | YES | YES | chr1:88253648-88257648 |
| NM_001159725 | Rab17         |  |  |  |  | YES | YES |     | chr1:92866744-92862744 |
| NM_001357556 | Hdlbp         |  |  |  |  | YES | YES | YES | chr1:95377454-95373454 |
| NM_133808    | Hdlbp         |  |  |  |  | YES | YES | YES | chr1:95377994-95373994 |
| NM_001159717 | Sept2         |  |  |  |  | YES | YES | YES | chr1:95373069-95377069 |
| NM_001159718 | Sept2         |  |  |  |  | YES | YES | YES | chr1:95373069-95377069 |
| NM_010891    | Sept2         |  |  |  |  | YES | YES | YES | chr1:95373069-95377069 |
| NM_001159719 | Sept2         |  |  |  |  | YES | YES | YES | chr1:95373137-95377137 |

|              |               |  |  |  |  |     |     |     |                          |
|--------------|---------------|--|--|--|--|-----|-----|-----|--------------------------|
| NM_001105667 | Dtymk         |  |  |  |  | YES | YES | YES | chr1:95701011-95697011   |
| NM_023136    | Dtymk         |  |  |  |  | YES | YES | YES | chr1:95701011-95697011   |
| NM_025454    | Ing5          |  |  |  |  | YES | YES | YES | chr1:95698041-95702041   |
| NM_027534    | Kdsr          |  |  |  |  | YES | YES | YES | chr1:108658819-108654819 |
| NM_001316750 | Kdsr          |  |  |  |  | YES | YES | YES | chr1:108658819-108654819 |
| NM_001037999 | Dbi           |  |  |  |  | YES | YES | YES | chr1:122019996-122015996 |
| NM_007830    | Dbi           |  |  |  |  | YES | YES | YES | chr1:122020173-122016173 |
| NM_001172074 | 3110009E18Rik |  |  |  |  | YES | YES | YES | chr1:122015263-122019263 |
| NM_028439    | 3110009E18Rik |  |  |  |  | YES | YES | YES | chr1:122015263-122019263 |
| NM_001356529 | Ubxn4         |  |  |  |  | YES | YES | YES | chr1:130138213-130142213 |
| NM_026390    | Ubxn4         |  |  |  |  | YES | YES | YES | chr1:130138213-130142213 |
| NM_011082    | Pigr          |  |  |  |  | YES | YES | YES | chr1:132720760-132724760 |
| NM_001195025 | Nuak2         |  |  |  |  | YES | YES | YES | chr1:134210201-134214201 |
| NM_028778    | Nuak2         |  |  |  |  | YES | YES | YES | chr1:134210201-134214201 |
| NM_133819    | Ppp1r15b      |  |  |  |  | YES | YES |     | chr1:135025242-135029242 |
| NM_001166552 | Zbed6         |  |  |  |  | YES | YES | YES | chr1:135559962-135555962 |
| NM_001358626 | Tor1aip2      |  |  |  |  | YES | YES | YES | chr1:157885469-157889469 |
| NM_001358627 | Tor1aip2      |  |  |  |  | YES | YES | YES | chr1:157885469-157889469 |
| NM_001160181 | Tor1aip2      |  |  |  |  | YES | YES | YES | chr1:157885490-157889490 |
| NM_022329    | Tor1aip2      |  |  |  |  | YES | YES | YES | chr1:157885490-157889490 |
| NM_009721    | Atp1b1        |  |  |  |  | YES | YES | YES | chr1:166390986-166386986 |
| NM_011137    | Pou2f1        |  |  |  |  | YES | YES | YES | chr1:167935265-167931265 |
| NM_198932    | Pou2f1        |  |  |  |  | YES | YES | YES | chr1:167935265-167931265 |
| NM_027188    | Smyd3         |  |  |  |  | YES | YES | YES | chr1:181450672-181446672 |
| NM_023341    | Coq8a         |  |  |  |  | YES | YES | YES | chr1:182128651-182124651 |
| NM_001359268 | Coq8a         |  |  |  |  | YES | YES | YES | chr1:182128651-182124651 |
| NM_001359269 | Coq8a         |  |  |  |  | YES | YES | YES | chr1:182128651-182124651 |
| NM_145943    | Sde2          |  |  |  |  | YES | YES | YES | chr1:182778781-182782781 |
| NM_001360783 | Degs1         |  |  |  |  | YES | YES | YES | chr1:184214826-184210826 |
| NM_007853    | Degs1         |  |  |  |  | YES | YES | YES | chr1:184215432-184211432 |
| NM_172546    | Cnksr3        |  |  |  |  | YES | YES | YES | chr10:3131803-3135803    |
| NM_001079686 | Syne1         |  |  |  |  | YES | YES | YES | chr10:5149333-5153333    |
| NM_024261    | Armt1         |  |  |  |  | YES | YES | YES | chr10:5916436-5912436    |
| NM_175155    | Sash1         |  |  |  |  | YES | YES | YES | chr10:8608368-8604368    |



|              |               |  |  |  |  |     |     |     |                         |
|--------------|---------------|--|--|--|--|-----|-----|-----|-------------------------|
| NM_001359559 | Abracl        |  |  |  |  | YES | YES | YES | chr10:17745558-17741558 |
| NM_001359560 | Abracl        |  |  |  |  | YES | YES | YES | chr10:17745396-17741396 |
| NM_028440    | Abracl        |  |  |  |  | YES | YES | YES | chr10:17745558-17741558 |
| NM_011603    | Tbpl1         |  |  |  |  | YES | YES |     | chr10:22453753-22449753 |
| NM_001162957 | Rsph4a        |  |  |  |  | YES | YES | YES | chr10:33622416-33626416 |
| NM_001173500 | Mfsd4b3       |  |  |  |  | YES | YES | YES | chr10:39682459-39678459 |
| NM_001277229 | Zbtb24        |  |  |  |  | YES | YES | YES | chr10:41167663-41171663 |
| NM_001277230 | Zbtb24        |  |  |  |  | YES | YES | YES | chr10:41167663-41171663 |
| NM_153398    | Zbtb24        |  |  |  |  | YES | YES | YES | chr10:41167663-41171663 |
| NR_102360    | Zbtb24        |  |  |  |  | YES | YES | YES | chr10:41167663-41171663 |
| NM_019740    | Foxo3         |  |  |  |  | YES | YES | YES | chr10:41999048-41995048 |
| NM_017472    | Snx3          |  |  |  |  | YES | YES |     | chr10:42219359-42223359 |
| NM_001359601 | Bend3         |  |  |  |  | YES | YES | YES | chr10:43209944-43213944 |
| NM_011240    | Ranbp2        |  |  |  |  | YES | YES | YES | chr10:57907099-57911099 |
| NR_027926    | 4930507D05Rik |  |  |  |  | YES | YES | YES | chr10:61909407-61913407 |
| NM_177372    | Dna2          |  |  |  |  | YES | YES |     | chr10:62407276-62411276 |
| NR_152862    | Dna2          |  |  |  |  | YES | YES |     | chr10:62407276-62411276 |
| NM_001079824 | Hnrnp3        |  |  |  |  | YES | YES | YES | chr10:62489097-62485097 |
| NM_026085    | Pblid2        |  |  |  |  | YES | YES | YES | chr10:62484759-62488759 |
| NM_001204915 | Reep3         |  |  |  |  | YES | YES | YES | chr10:66562236-66558236 |
| NM_178606    | Reep3         |  |  |  |  | YES | YES | YES | chr10:66562236-66558236 |
| NM_172549    | Cabin1        |  |  |  |  | YES | YES | YES | chr10:75229602-75225602 |
| NM_010027    | Ddt           |  |  |  |  | YES | YES | YES | chr10:75238619-75234619 |
| NM_010361    | Gstt2         |  |  |  |  | YES | YES | YES | chr10:75300126-75296126 |
| NM_172134    | Pdxk          |  |  |  |  | YES | YES | YES | chr10:77930193-77926193 |
| NR_029447    | E130317F20Rik |  |  |  |  | YES | YES | YES | chr10:79320216-79316216 |
| NM_008162    | Gpx4          |  |  |  |  | YES | YES | YES | chr10:79513732-79517732 |
| NM_001037741 | Gpx4          |  |  |  |  | YES | YES | YES | chr10:79514263-79518263 |
| NM_001305798 | Midn          |  |  |  |  |     | YES | YES | chr10:79608516-79612516 |
| NM_001347117 | Midn          |  |  |  |  |     | YES | YES | chr10:79608516-79612516 |
| NM_021565    | Midn          |  |  |  |  |     | YES | YES | chr10:79608516-79612516 |
| NM_001305799 | Midn          |  |  |  |  | YES | YES | YES | chr10:79609926-79613926 |
| NM_021462    | Mknk2         |  |  |  |  | YES | YES | YES | chr10:80141538-80137538 |
| NM_007460    | Ap3d1         |  |  |  |  | YES | YES | YES | chr10:80207520-80203520 |

|              |               |  |  |  |  |     |     |     |                           |
|--------------|---------------|--|--|--|--|-----|-----|-----|---------------------------|
| NR_049186    | Mir5615-1     |  |  |  |  | YES | YES | YES | chr10:80569918-80565918   |
| NM_001347144 | Map2k2        |  |  |  |  | YES | YES | YES | chr10:80566159-80570159   |
| NM_001358539 | Map2k2        |  |  |  |  | YES | YES | YES | chr10:80566159-80570159   |
| NM_023138    | Map2k2        |  |  |  |  | YES | YES | YES | chr10:80566159-80570159   |
| NM_010731    | Zbtb7a        |  |  |  |  | YES | YES |     | chr10:80596515-80600515   |
| NM_001282095 | Tjp3          |  |  |  |  | YES | YES | YES | chr10:80756826-80752826   |
| NM_013769    | Tjp3          |  |  |  |  | YES | YES | YES | chr10:80756512-80752512   |
| NM_001146687 | Pip5k1c       |  |  |  |  | YES | YES | YES | chr10:80753207-80757207   |
| NM_001293646 | Pip5k1c       |  |  |  |  | YES | YES | YES | chr10:80753207-80757207   |
| NM_001293647 | Pip5k1c       |  |  |  |  | YES | YES | YES | chr10:80753207-80757207   |
| NM_008844    | Pip5k1c       |  |  |  |  | YES | YES | YES | chr10:80753207-80757207   |
| NR_152732    | Gm16104       |  |  |  |  | YES | YES | YES | chr10:80869819-80873819   |
| NM_001304572 | Vezt          |  |  |  |  | YES | YES |     | chr10:93501044-93497044   |
| NM_001304575 | Vezt          |  |  |  |  | YES | YES |     | chr10:93501044-93497044   |
| NM_001304720 | Vezt          |  |  |  |  | YES | YES |     | chr10:93500987-93496987   |
| NM_172538    | Vezt          |  |  |  |  | YES | YES |     | chr10:93501044-93497044   |
| NR_045338    | 5730420D15Rik |  |  |  |  | YES | YES | YES | chr10:94877508-94881508   |
| NR_045339    | 5730420D15Rik |  |  |  |  | YES | YES | YES | chr10:94877508-94881508   |
| NM_080560    | Ube2n         |  |  |  |  | YES | YES | YES | chr10:94975295-94979295   |
| NM_026268    | Dusp6         |  |  |  |  | YES | YES | YES | chr10:98723364-98727364   |
| NM_025706    | Tbc1d15       |  |  |  |  | YES | YES | YES | chr10:114691049-114687049 |
| NM_027994    | Cand1         |  |  |  |  | YES | YES | YES | chr10:118679611-118675611 |
| NM_080446    | Helb          |  |  |  |  | YES | YES |     | chr10:119552521-119548521 |
| NM_001081056 | Xpot          |  |  |  |  | YES | YES | YES | chr10:121065888-121061888 |
| NM_001359618 | Xpot          |  |  |  |  | YES | YES | YES | chr10:121065888-121061888 |
| NM_025537    | Tsfm          |  |  |  |  | YES | YES |     | chr10:126470370-126466370 |
| NM_025716    | Spryd4        |  |  |  |  | YES | YES | YES | chr10:127651350-127647350 |
| NM_134003    | Zc3h10        |  |  |  |  | YES | YES | YES | chr10:127987300-127983300 |
| NM_013765    | Rps26         |  |  |  |  | YES | YES |     | chr10:128066062-128062062 |
| NM_001253705 | Pym1          |  |  |  |  | YES | YES |     | chr10:128182434-128186434 |
| NM_030100    | Pym1          |  |  |  |  | YES | YES |     | chr10:128182434-128186434 |
| NM_001170869 | Pym1          |  |  |  |  | YES | YES |     | chr10:128183010-128187010 |
| NM_001253704 | Pym1          |  |  |  |  | YES | YES |     | chr10:128183010-128187010 |
| NM_001363163 | Osbp2         |  |  |  |  | YES | YES | YES | chr11:3766406-3762406     |

|              |          |  |  |  |     |     |     |                         |
|--------------|----------|--|--|--|-----|-----|-----|-------------------------|
| NM_152818    | Osbp2    |  |  |  | YES | YES | YES | chr11:3766406-3762406   |
| NM_001130459 | Tcn2     |  |  |  | YES | YES | YES | chr11:3834464-3830464   |
| NM_001130458 | Tcn2     |  |  |  | YES | YES | YES | chr11:3834581-3830581   |
| NM_015749    | Tcn2     |  |  |  | YES | YES | YES | chr11:3834547-3830547   |
| NM_022889    | Pes1     |  |  |  | YES | YES | YES | chr11:3861477-3865477   |
| NM_001283061 | Ewsr1    |  |  |  | YES | YES | YES | chr11:5001599-4997599   |
| NM_001283062 | Ewsr1    |  |  |  | YES | YES | YES | chr11:5001599-4997599   |
| NM_001362612 | Ewsr1    |  |  |  | YES | YES | YES | chr11:5001599-4997599   |
| NM_001362613 | Ewsr1    |  |  |  | YES | YES | YES | chr11:5001599-4997599   |
| NM_001362614 | Ewsr1    |  |  |  | YES | YES | YES | chr11:5001599-4997599   |
| NM_001362615 | Ewsr1    |  |  |  | YES | YES | YES | chr11:5001599-4997599   |
| NM_001362616 | Ewsr1    |  |  |  | YES | YES | YES | chr11:5001599-4997599   |
| NM_001362617 | Ewsr1    |  |  |  | YES | YES | YES | chr11:5001599-4997599   |
| NM_001362620 | Ewsr1    |  |  |  | YES | YES | YES | chr11:5001599-4997599   |
| NM_007968    | Ewsr1    |  |  |  | YES | YES | YES | chr11:5001599-4997599   |
| NM_001283063 | Ewsr1    |  |  |  | YES | YES | YES | chr11:5001599-4997599   |
| NM_001362618 | Ewsr1    |  |  |  | YES | YES | YES | chr11:5001599-4997599   |
| NM_001290491 | Rhbdd3   |  |  |  | YES | YES | YES | chr11:4996775-5000775   |
| NM_001290492 | Rhbdd3   |  |  |  | YES | YES | YES | chr11:4996775-5000775   |
| NM_177370    | Rhbdd3   |  |  |  | YES | YES | YES | chr11:4996775-5000775   |
| NR_110961    | Rhbdd3   |  |  |  | YES | YES | YES | chr11:4997250-5001250   |
| NM_001290493 | Rhbdd3   |  |  |  | YES | YES | YES | chr11:4997667-5001667   |
| NR_015577    | Ube2d-ps |  |  |  | YES | YES | YES | chr11:5659652-5663652   |
| NR_045893    | Snhg15   |  |  |  | YES | YES | YES | chr11:6431263-6427263   |
| NR_105791    | Mir6372  |  |  |  | YES | YES | YES | chr11:26099739-26103739 |
| NM_001033865 | Rps27a   |  |  |  | YES | YES | YES | chr11:29450540-29446540 |
| NM_024277    | Rps27a   |  |  |  | YES | YES | YES | chr11:29450540-29446540 |
| NM_001163521 | Clhc1    |  |  |  | YES | YES | YES | chr11:29445449-29449449 |
| NM_028504    | Clhc1    |  |  |  | YES | YES | YES | chr11:29445449-29449449 |
| NM_001024846 | Zfp62    |  |  |  | YES | YES | YES | chr11:49014293-49018293 |
| NM_001362725 | Zfp62    |  |  |  | YES | YES | YES | chr11:49014293-49018293 |
| NM_001362726 | Zfp62    |  |  |  | YES | YES | YES | chr11:49014293-49018293 |
| NM_001362728 | Zfp62    |  |  |  | YES | YES | YES | chr11:49014293-49018293 |
| NM_001362729 | Zfp62    |  |  |  | YES | YES | YES | chr11:49014293-49018293 |

|              |            |  |  |  |  |     |     |     |                         |
|--------------|------------|--|--|--|--|-----|-----|-----|-------------------------|
| NM_001362730 | Zfp62      |  |  |  |  | YES | YES | YES | chr11:49014293-49018293 |
| NM_009562    | Zfp62      |  |  |  |  | YES | YES | YES | chr11:49014293-49018293 |
| NM_001362731 | Zfp62      |  |  |  |  | YES | YES | YES | chr11:49014732-49018732 |
| NM_001362727 | Zfp62      |  |  |  |  | YES | YES | YES | chr11:49015320-49019320 |
| NM_001044697 | Zfp2       |  |  |  |  | YES | YES | YES | chr11:50732178-50728178 |
| NM_001044698 | Zfp2       |  |  |  |  | YES | YES | YES | chr11:50732178-50728178 |
| NM_001044700 | Zfp2       |  |  |  |  | YES | YES | YES | chr11:50732178-50728178 |
| NM_001294323 | Zfp2       |  |  |  |  | YES | YES | YES | chr11:50732178-50728178 |
| NM_178447    | Zfp2       |  |  |  |  | YES | YES | YES | chr11:50732178-50728178 |
| NM_025346    | Rmnd5b     |  |  |  |  | YES | YES | YES | chr11:51451898-51447898 |
| NM_029976    | Cdkn2aipnl |  |  |  |  | YES | YES |     | chr11:51778632-51782632 |
| NM_008300    | Hspa4      |  |  |  |  | YES | YES | YES | chr11:53116481-53112481 |
| NM_001326614 | Uqcrq      |  |  |  |  | YES | YES | YES | chr11:53246833-53242833 |
| NM_025352    | Uqcrq      |  |  |  |  | YES | YES | YES | chr11:53246833-53242833 |
| NR_106131    | Mir7671    |  |  |  |  | YES | YES | YES | chr11:53579656-53575656 |
| NM_026949    | Cnot8      |  |  |  |  | YES | YES |     | chr11:57914971-57918971 |
| NM_001356477 | Cnot8      |  |  |  |  | YES | YES |     | chr11:57915230-57919230 |
| NM_001363086 | Cnot8      |  |  |  |  | YES | YES |     | chr11:57915310-57919310 |
| NR_045686    | Gm16062    |  |  |  |  | YES | YES | YES | chr11:59621081-59625081 |
| NM_001290011 | Pemt       |  |  |  |  | YES | YES | YES | chr11:59862491-59858491 |
| NM_001290012 | Pemt       |  |  |  |  | YES | YES | YES | chr11:59862491-59858491 |
| NM_029044    | Drc3       |  |  |  |  | YES | YES | YES | chr11:60164381-60168381 |
| NM_001364117 | Atpaf2     |  |  |  |  | YES | YES | YES | chr11:60233036-60229036 |
| NM_001364118 | Atpaf2     |  |  |  |  | YES | YES | YES | chr11:60233036-60229036 |
| NM_145427    | Atpaf2     |  |  |  |  | YES | YES | YES | chr11:60233036-60229036 |
| NR_157083    | Atpaf2     |  |  |  |  | YES | YES | YES | chr11:60233036-60229036 |
| NM_025757    | Gid4       |  |  |  |  | YES | YES | YES | chr11:60228146-60232146 |
| NR_039559    | Mir5100    |  |  |  |  | YES | YES |     | chr11:60539664-60543664 |
| NM_001168507 | Tmem11     |  |  |  |  | YES | YES | YES | chr11:60695040-60691040 |
| NM_173453    | Tmem11     |  |  |  |  | YES | YES | YES | chr11:60695040-60691040 |
| NM_025294    | Natd1      |  |  |  |  | YES | YES | YES | chr11:60729794-60725794 |
| NR_138545    | Aldh3a2    |  |  |  |  | YES | YES | YES | chr11:61083530-61079530 |
| NM_001331114 | Aldh3a2    |  |  |  |  | YES | YES | YES | chr11:61083188-61079188 |
| NM_001331115 | Aldh3a2    |  |  |  |  | YES | YES | YES | chr11:61083530-61079530 |

|              |          |  |  |  |     |     |     |                         |
|--------------|----------|--|--|--|-----|-----|-----|-------------------------|
| NM_007437    | Aldh3a2  |  |  |  | YES | YES | YES | chr11:61083188-61079188 |
| NM_011664    | Ubb      |  |  |  | YES | YES | YES | chr11:62362172-62366172 |
| NM_001313984 | Ubb      |  |  |  | YES | YES | YES | chr11:62362732-62366732 |
| NM_001363304 | Ndel1    |  |  |  | YES | YES | YES | chr11:68669137-68665137 |
| NM_001363305 | Ndel1    |  |  |  | YES | YES | YES | chr11:68669137-68665137 |
| NM_023668    | Ndel1    |  |  |  | YES | YES | YES | chr11:68669137-68665137 |
| NM_001017426 | Kdm6b    |  |  |  | YES | YES |     | chr11:69232196-69228196 |
| NM_001159375 | Eif4a1   |  |  |  | YES | YES | YES | chr11:69488425-69484425 |
| NM_144958    | Eif4a1   |  |  |  | YES | YES | YES | chr11:69488425-69484425 |
| NM_001364137 | Nlgn2    |  |  |  | YES | YES | YES | chr11:69653786-69649786 |
| NM_026982    | Tmem256  |  |  |  | YES | YES | YES | chr11:69649526-69653526 |
| NM_001166589 | Eif5a    |  |  |  | YES | YES | YES | chr11:69737388-69733388 |
| NM_001166590 | Eif5a    |  |  |  | YES | YES | YES | chr11:69736632-69732632 |
| NM_001166591 | Eif5a    |  |  |  | YES | YES | YES | chr11:69737388-69733388 |
| NM_001166592 | Eif5a    |  |  |  | YES | YES | YES | chr11:69736949-69732949 |
| NM_001166593 | Eif5a    |  |  |  | YES | YES | YES | chr11:69737960-69733960 |
| NM_001166594 | Eif5a    |  |  |  | YES | YES | YES | chr11:69736949-69732949 |
| NM_001166595 | Eif5a    |  |  |  | YES | YES | YES | chr11:69737277-69733277 |
| NM_001166596 | Eif5a    |  |  |  | YES | YES | YES | chr11:69737087-69733087 |
| NM_181582    | Eif5a    |  |  |  | YES | YES | YES | chr11:69737388-69733388 |
| NM_001291141 | Rabep1   |  |  |  | YES | YES | YES | chr11:70655762-70659762 |
| NM_001291142 | Rabep1   |  |  |  | YES | YES | YES | chr11:70655762-70659762 |
| NM_001291143 | Rabep1   |  |  |  | YES | YES | YES | chr11:70655762-70659762 |
| NM_019400    | Rabep1   |  |  |  | YES | YES | YES | chr11:70655762-70659762 |
| NM_029031    | Shpk     |  |  |  | YES | YES |     | chr11:73010483-73014483 |
| NM_010813    | Mnt      |  |  |  | YES | YES | YES | chr11:74641925-74645925 |
| NM_197943    | Sgsm2    |  |  |  | YES | YES | YES | chr11:74713082-74709082 |
| NM_177325    | Tsr1     |  |  |  | YES | YES | YES | chr11:74709081-74713081 |
| NM_008952    | Pipox    |  |  |  | YES | YES | YES | chr11:77709874-77705874 |
| NM_022411    | Slc13a2  |  |  |  | YES | YES | YES | chr11:78238236-78234236 |
| NR_028363    | AA465934 |  |  |  | YES | YES | YES | chr11:83102700-83106700 |
| NR_028364    | AI450353 |  |  |  | YES | YES | YES | chr11:83104431-83108431 |
| NM_001291440 | Rad51c   |  |  |  | YES | YES | YES | chr11:87220956-87216956 |
| NM_053269    | Rad51c   |  |  |  | YES | YES | YES | chr11:87220508-87216508 |

|              |               |  |  |  |     |     |     |                           |
|--------------|---------------|--|--|--|-----|-----|-----|---------------------------|
| NR_156495    | Rad51c        |  |  |  | YES | YES | YES | chr11:87220508-87216508   |
| NM_031386    | Tex14         |  |  |  | YES | YES | YES | chr11:87216066-87220066   |
| NM_001168472 | Dynll2        |  |  |  | YES | YES | YES | chr11:87802587-87798587   |
| NM_001042541 | Akap1         |  |  |  |     | YES | YES | chr11:88728400-88724400   |
| NM_008704    | Nme1          |  |  |  | YES | YES | YES | chr11:93832335-93828335   |
| NM_153807    | Acsf2         |  |  |  | YES | YES | YES | chr11:94465600-94461600   |
| NR_003293    | D030028A08Rik |  |  |  | YES | YES | YES | chr11:96802959-96806959   |
| NM_008379    | Kpnb1         |  |  |  | YES | YES | YES | chr11:97051706-97047706   |
| NM_025927    | Mrpl45        |  |  |  | YES | YES | YES | chr11:97174529-97178529   |
| NM_011971    | Psmb3         |  |  |  | YES | YES | YES | chr11:97562247-97566247   |
| NM_001080935 | B230217C12Rik |  |  |  | YES | YES |     | chr11:97699593-97703593   |
| NM_009024    | Rara          |  |  |  | YES | YES | YES | chr11:98796509-98800509   |
| NM_001177302 | Rara          |  |  |  | YES | YES | YES | chr11:98796531-98800531   |
| NM_011508    | Eif1          |  |  |  | YES | YES | YES | chr11:100178762-100182762 |
| NM_011486    | Stat3         |  |  |  | YES | YES | YES | chr11:100803354-100799354 |
| NM_213659    | Stat3         |  |  |  | YES | YES | YES | chr11:100803354-100799354 |
| NM_213660    | Stat3         |  |  |  | YES | YES | YES | chr11:100803354-100799354 |
| NM_175935    | G6pc3         |  |  |  | YES | YES | YES | chr11:102048512-102052512 |
| NR_106179    | Mir8101       |  |  |  | YES | YES | YES | chr11:102093964-102089964 |
| NM_026542    | Slc25a39      |  |  |  | YES | YES | YES | chr11:102271331-102267331 |
| NM_025918    | Ccdc43        |  |  |  | YES | YES | YES | chr11:102561539-102557539 |
| NM_138753    | Hexim1        |  |  |  | YES | YES |     | chr11:102975138-102979138 |
| NM_001081045 | Kansl1        |  |  |  | YES | YES |     | chr11:104306105-104302105 |
| NM_181071    | Tanc2         |  |  |  | YES | YES | YES | chr11:105448799-105452799 |
| NR_030703    | Snord104      |  |  |  | YES | YES | YES | chr11:106359804-106363804 |
| NM_001362749 | Abca8b        |  |  |  | YES | YES | YES | chr11:109859659-109855659 |
| NM_013851    | Abca8b        |  |  |  | YES | YES | YES | chr11:109859659-109855659 |
| NM_001243584 | Mif4gd        |  |  |  | YES | YES |     | chr11:115476783-115472783 |
| NM_001243587 | Mif4gd        |  |  |  | YES | YES |     | chr11:115476783-115472783 |
| NM_146032    | Srp68         |  |  |  | YES | YES | YES | chr11:116138031-116134031 |
| NM_198022    | Tnrc6c        |  |  |  | YES | YES | YES | chr11:117513102-117517102 |
| NM_007707    | Socs3         |  |  |  | YES | YES | YES | chr11:117833180-117829180 |
| NM_001313923 | Actg1         |  |  |  | YES | YES |     | chr11:120212309-120208309 |
| NM_009609    | Actg1         |  |  |  | YES | YES |     | chr11:120212309-120208309 |

|              |               |  |  |  |  |     |     |     |                           |
|--------------|---------------|--|--|--|--|-----|-----|-----|---------------------------|
| NR_105900    | Mir6935       |  |  |  |  | YES | YES |     | chr11:120211227-120207227 |
| NR_038126    | 0610009L18Rik |  |  |  |  | YES | YES |     | chr11:120207491-120211491 |
| NM_007988    | Fasn          |  |  |  |  | YES | YES |     | chr11:120688361-120684361 |
| NM_025402    | Ogfod3        |  |  |  |  | YES | YES | YES | chr11:121068462-121064462 |
| NM_001001333 | Hexdc         |  |  |  |  | YES | YES | YES | chr11:121063246-121067246 |
| NM_001080932 | Foxk2         |  |  |  |  | YES | YES | YES | chr11:121118800-121122800 |
| NM_001363033 | Foxk2         |  |  |  |  | YES | YES | YES | chr11:121118800-121122800 |
| NR_030694    | 1110002L01Rik |  |  |  |  | YES | YES | YES | chr12:3429247-3425247     |
| NM_030723    | Pum2          |  |  |  |  | YES | YES |     | chr12:8678986-8682986     |
| NM_001130412 | Lpin1         |  |  |  |  | YES | YES |     | chr12:16599076-16595076   |
| NM_015763    | Lpin1         |  |  |  |  | YES | YES |     | chr12:16599076-16595076   |
| NM_172950    | Lpin1         |  |  |  |  | YES | YES |     | chr12:16599076-16595076   |
| NR_044986    | 4933406C10Rik |  |  |  |  | YES | YES | YES | chr12:33641154-33637154   |
| NM_013635    | Sypl          |  |  |  |  |     | YES | YES | chr12:33636309-33640309   |
| NM_198710    | Sypl          |  |  |  |  | YES | YES | YES | chr12:33636550-33640550   |
| NM_013562    | lfrd1         |  |  |  |  | YES | YES | YES | chr12:40952276-40948276   |
| NR_035459    | Mir1938       |  |  |  |  | YES | YES | YES | chr12:40951898-40947898   |
| NR_045157    | Gm7008        |  |  |  |  | YES | YES | YES | chr12:40947450-40951450   |
| NM_013760    | Dnajb9        |  |  |  |  | YES | YES | YES | chr12:45313555-45309555   |
| NR_049203    | Mir5627       |  |  |  |  | YES | YES | YES | chr12:45308799-45312799   |
| NM_008910    | Ppm1a         |  |  |  |  | YES | YES | YES | chr12:73859697-73863697   |
| NM_029580    | Trmt5         |  |  |  |  | YES | YES |     | chr12:74390198-74386198   |
| NM_001037717 | Slc38a6       |  |  |  |  | YES | YES |     | chr12:74385334-74389334   |
| NR_046013    | D830013O20Rik |  |  |  |  | YES | YES |     | chr12:74513050-74509050   |
| NM_023721    | Atp6v1d       |  |  |  |  | YES | YES | YES | chr12:79965125-79961125   |
| NM_026114    | Eif2s1        |  |  |  |  | YES | YES | YES | chr12:79960558-79964558   |
| NM_001346669 | Actn1         |  |  |  |  | YES | YES | YES | chr12:81363868-81359868   |
| NM_134156    | Actn1         |  |  |  |  | YES | YES | YES | chr12:81363858-81359858   |
| NM_001242419 | Susd6         |  |  |  |  | YES | YES | YES | chr12:81889018-81893018   |
| NM_178682    | Susd6         |  |  |  |  | YES | YES | YES | chr12:81889018-81893018   |
| NM_001364416 | Rbm25         |  |  |  |  | YES | YES | YES | chr12:84970692-84974692   |
| NM_027349    | Rbm25         |  |  |  |  | YES | YES | YES | chr12:84970692-84974692   |
| NM_028863    | Isca2         |  |  |  |  | YES | YES |     | chr12:86111719-86115719   |
| NM_001364360 | Acyp1         |  |  |  |  | YES | YES |     | chr12:86631888-86627888   |

|              |               |  |  |  |     |     |     |                           |
|--------------|---------------|--|--|--|-----|-----|-----|---------------------------|
| NM_172414    | Zc2hc1c       |  |  |  | YES | YES |     | chr12:86627040-86631040   |
| NR_045282    | Gm10433       |  |  |  | YES | YES | YES | chr12:101423677-101427677 |
| NM_029705    | Atxn3         |  |  |  | YES | YES | YES | chr12:103198953-103194953 |
| NM_001167914 | Atxn3         |  |  |  | YES | YES | YES | chr12:103198953-103194953 |
| NM_178613    | Gskip         |  |  |  | YES | YES |     | chr12:106921061-106925061 |
| NR_033340    | B930059L03Rik |  |  |  | YES | YES | YES | chr12:111827083-111831083 |
| NM_001024602 | Cep170b       |  |  |  | YES | YES |     | chr12:113957884-113961884 |
| NR_015492    | C230035I16Rik |  |  |  | YES | YES |     | chr13:23525386-23521386   |
| NM_025790    | Acot13        |  |  |  | YES | YES | YES | chr13:24925858-24921858   |
| NM_019551    | Tdp2          |  |  |  | YES | YES | YES | chr13:24921027-24925027   |
| NR_155347    | A730081D07Rik |  |  |  | YES | YES | YES | chr13:41099015-41095015   |
| NM_026550    | Pak1ip1       |  |  |  | YES | YES | YES | chr13:41093878-41097878   |
| NM_025772    | Dtnbp1        |  |  |  | YES | YES | YES | chr13:45099965-45095965   |
| NR_029463    | 9430083A17Rik |  |  |  | YES | YES | YES | chr13:51198596-51194596   |
| NM_001283028 | Spin1         |  |  |  | YES | YES | YES | chr13:51193748-51197748   |
| NM_001283030 | Spin1         |  |  |  | YES | YES | YES | chr13:51193748-51197748   |
| NM_146043    | Spin1         |  |  |  | YES | YES | YES | chr13:51193748-51197748   |
| NM_001283029 | Spin1         |  |  |  | YES | YES | YES | chr13:51194415-51198415   |
| NM_025415    | Cks2          |  |  |  | YES | YES | YES | chr13:51738100-51742100   |
| NM_025596    | Preli1        |  |  |  | YES | YES |     | chr13:55420915-55424915   |
| NM_016662    | Mxd3          |  |  |  | YES | YES |     | chr13:55433591-55429591   |
| NM_001301340 | Hnrnpk        |  |  |  | YES | YES | YES | chr13:58506373-58502373   |
| NM_001301341 | Hnrnpk        |  |  |  | YES | YES | YES | chr13:58507204-58503204   |
| NM_001301343 | Hnrnpk        |  |  |  | YES | YES | YES | chr13:58506030-58502030   |
| NM_001301344 | Hnrnpk        |  |  |  | YES | YES | YES | chr13:58506373-58502373   |
| NM_001301345 | Hnrnpk        |  |  |  | YES | YES | YES | chr13:58506373-58502373   |
| NM_025279    | Hnrnpk        |  |  |  | YES | YES | YES | chr13:58506373-58502373   |
| NM_001360490 | Hnrnpk        |  |  |  | YES | YES | YES | chr13:58505978-58501978   |
| NM_001360491 | Hnrnpk        |  |  |  | YES | YES | YES | chr13:58506373-58502373   |
| NM_001360493 | Hnrnpk        |  |  |  | YES | YES | YES | chr13:58506373-58502373   |
| NM_001360494 | Hnrnpk        |  |  |  | YES | YES | YES | chr13:58505978-58501978   |
| NM_001360495 | Hnrnpk        |  |  |  | YES | YES | YES | chr13:58505978-58501978   |
| NR_153501    | Hnrnpk        |  |  |  | YES | YES | YES | chr13:58506373-58502373   |
| NR_153502    | Hnrnpk        |  |  |  | YES | YES | YES | chr13:58506373-58502373   |



|              |               |  |  |  |     |     |     |                           |
|--------------|---------------|--|--|--|-----|-----|-----|---------------------------|
| NR_153503    | Hnrnpk        |  |  |  | YES | YES | YES | chr13:58505978-58501978   |
| NR_153504    | Hnrnpk        |  |  |  | YES | YES | YES | chr13:58506373-58502373   |
| NR_031761    | Rmi1          |  |  |  | YES | YES | YES | chr13:58501108-58505108   |
| NM_001168248 | Rmi1          |  |  |  | YES | YES | YES | chr13:58501457-58505457   |
| NM_028904    | Rmi1          |  |  |  | YES | YES | YES | chr13:58501457-58505457   |
| NM_007994    | Fbp2          |  |  |  | YES | YES | YES | chr13:62962230-62958230   |
| NR_110520    | 2010111I01Rik |  |  |  | YES | YES | YES | chr13:63338837-63342837   |
| NR_110521    | 2010111I01Rik |  |  |  | YES | YES | YES | chr13:63338837-63342837   |
| NM_001163246 | Zfp729b       |  |  |  | YES | YES |     | chr13:67713144-67709144   |
| NM_001308475 | Mtrr          |  |  |  | YES | YES |     | chr13:68723481-68719481   |
| NM_172480    | Mtrr          |  |  |  | YES | YES |     | chr13:68723546-68719546   |
| NR_131892    | Mtrr          |  |  |  | YES | YES |     | chr13:68723546-68719546   |
| NM_001330423 | Fastkd3       |  |  |  | YES | YES |     | chr13:68718586-68722586   |
| NM_027123    | Fastkd3       |  |  |  | YES | YES |     | chr13:68718586-68722586   |
| NR_138477    | Fastkd3       |  |  |  | YES | YES |     | chr13:68718586-68722586   |
| NR_138478    | Fastkd3       |  |  |  | YES | YES |     | chr13:68718586-68722586   |
| NM_007684    | Cetn3         |  |  |  | YES | YES | YES | chr13:81919745-81923745   |
| NM_029153    | Scamp1        |  |  |  | YES | YES |     | chr13:95057736-95053736   |
| NM_027711    | Iqgap2        |  |  |  | YES | YES |     | chr13:96664377-96660377   |
| NM_178716    | Tnpo1         |  |  |  | YES | YES |     | chr13:99698839-99694839   |
| NM_001077495 | Pik3r1        |  |  |  | YES | YES |     | chr13:102540672-102536672 |
| NM_028151    | Mtrex         |  |  |  | YES | YES | YES | chr13:113720088-113716088 |
| NM_172594    | Dhx29         |  |  |  | YES | YES | YES | chr13:113715500-113719500 |
| NM_008710    | Nnt           |  |  |  | YES | YES | YES | chr13:120200318-120196318 |
| NM_001308506 | Nnt           |  |  |  | YES | YES | YES | chr13:120200564-120196564 |
| NR_029446    | 6230400D17Rik |  |  |  | YES | YES | YES | chr14:21524821-21520821   |
| NM_025366    | Chchd1        |  |  |  | YES | YES | YES | chr14:21519748-21523748   |
| NM_001243041 | Adk           |  |  |  | YES | YES |     | chr14:21892873-21896873   |
| NM_011695    | Vdac2         |  |  |  | YES | YES | YES | chr14:22648282-22652282   |
| NM_134084    | Ppif          |  |  |  | YES | YES |     | chr14:26511155-26515155   |
| NM_153547    | Gnl3          |  |  |  | YES | YES | YES | chr14:31834817-31830817   |
| NR_104298    | Gnl3          |  |  |  | YES | YES | YES | chr14:31834817-31830817   |
| NM_001081251 | Pbrm1         |  |  |  | YES | YES | YES | chr14:31829823-31833823   |
| NM_001359854 | Pbrm1         |  |  |  | YES | YES | YES | chr14:31830390-31834390   |

|              |               |  |  |  |  |     |     |     |                         |
|--------------|---------------|--|--|--|--|-----|-----|-----|-------------------------|
| NM_001359855 | Pbrm1         |  |  |  |  | YES | YES | YES | chr14:31830390-31834390 |
| NM_001359856 | Pbrm1         |  |  |  |  | YES | YES | YES | chr14:31830390-31834390 |
| NM_001359857 | Pbrm1         |  |  |  |  | YES | YES | YES | chr14:31830390-31834390 |
| NM_001359858 | Pbrm1         |  |  |  |  | YES | YES | YES | chr14:31830390-31834390 |
| NM_001316734 | Fam213a       |  |  |  |  | YES | YES | YES | chr14:41829622-41825622 |
| NM_001316735 | Fam213a       |  |  |  |  | YES | YES | YES | chr14:41829622-41825622 |
| NM_001316737 | Fam213a       |  |  |  |  | YES | YES | YES | chr14:41829622-41825622 |
| NM_027464    | Fam213a       |  |  |  |  | YES | YES | YES | chr14:41829622-41825622 |
| NM_022023    | Gmfb          |  |  |  |  | YES | YES | YES | chr14:47444417-47440417 |
| NM_001293635 | Ktn1          |  |  |  |  | YES | YES | YES | chr14:48266485-48270485 |
| NM_001293636 | Ktn1          |  |  |  |  | YES | YES | YES | chr14:48266485-48270485 |
| NM_001347519 | Ktn1          |  |  |  |  | YES | YES | YES | chr14:48266485-48270485 |
| NM_001347520 | Ktn1          |  |  |  |  | YES | YES | YES | chr14:48266485-48270485 |
| NM_001347521 | Ktn1          |  |  |  |  | YES | YES | YES | chr14:48266485-48270485 |
| NM_001347523 | Ktn1          |  |  |  |  | YES | YES | YES | chr14:48266485-48270485 |
| NM_001347524 | Ktn1          |  |  |  |  | YES | YES | YES | chr14:48266485-48270485 |
| NM_001347525 | Ktn1          |  |  |  |  | YES | YES | YES | chr14:48266485-48270485 |
| NM_001347526 | Ktn1          |  |  |  |  | YES | YES | YES | chr14:48266485-48270485 |
| NM_001347527 | Ktn1          |  |  |  |  | YES | YES | YES | chr14:48266485-48270485 |
| NM_001347528 | Ktn1          |  |  |  |  | YES | YES | YES | chr14:48266485-48270485 |
| NM_001253694 | Zfp219        |  |  |  |  | YES | YES |     | chr14:52641888-52637888 |
| NM_001310603 | Spryd7        |  |  |  |  | YES | YES |     | chr14:62178223-62174223 |
| NM_025697    | Spryd7        |  |  |  |  | YES | YES |     | chr14:62178223-62174223 |
| NM_026001    | Rnaseh2b      |  |  |  |  | YES | YES | YES | chr14:62948404-62952404 |
| NR_045503    | 4931440J10Rik |  |  |  |  | YES | YES | YES | chr14:63376837-63380837 |
| NM_001110162 | Cdca2         |  |  |  |  | YES | YES | YES | chr14:68336167-68332167 |
| NM_175384    | Cdca2         |  |  |  |  | YES | YES | YES | chr14:68336398-68332398 |
| NM_001111028 | Kctd9         |  |  |  |  | YES | YES | YES | chr14:68331654-68335654 |
| NM_001285933 | Kctd9         |  |  |  |  | YES | YES | YES | chr14:68331654-68335654 |
| NM_134073    | Kctd9         |  |  |  |  | YES | YES | YES | chr14:68331654-68335654 |
| NM_001359875 | Zc3h13        |  |  |  |  | YES | YES | YES | chr14:75681672-75685672 |
| NM_026083    | Zc3h13        |  |  |  |  | YES | YES | YES | chr14:75681679-75685679 |
| NM_026177    | Gpalpp1       |  |  |  |  | YES | YES |     | chr14:76513122-76509122 |
| NM_027906    | Vwa8          |  |  |  |  | YES | YES | YES | chr14:79246484-79250484 |

|              |               |  |  |  |     |     |     |                           |
|--------------|---------------|--|--|--|-----|-----|-----|---------------------------|
| NM_173758    | Vwa8          |  |  |  | YES | YES | YES | chr14:79246484-79250484   |
| NM_018765    | Wbp4          |  |  |  | YES | YES |     | chr14:79883575-79879575   |
| NM_007920    | Elf1          |  |  |  | YES | YES |     | chr14:79878500-79882500   |
| NM_001128307 | Dock9         |  |  |  | YES | YES |     | chr14:122140651-122136651 |
| NM_001128308 | Dock9         |  |  |  | YES | YES |     | chr14:122140651-122136651 |
| NR_045740    | Gm2093        |  |  |  | YES | YES | YES | chr15:3943538-3947538     |
| NM_001353141 | Myo10         |  |  |  | YES | YES |     | chr15:25701267-25705267   |
| NM_001081359 | Ubr5          |  |  |  | YES | YES | YES | chr15:38011109-38007109   |
| NM_001112721 | Ubr5          |  |  |  | YES | YES | YES | chr15:38011109-38007109   |
| NM_001102458 | Azin1         |  |  |  | YES | YES | YES | chr15:38451521-38447521   |
| NM_001301688 | Azin1         |  |  |  | YES | YES | YES | chr15:38451521-38447521   |
| NM_018745    | Azin1         |  |  |  | YES | YES | YES | chr15:38451521-38447521   |
| NR_125913    | Azin1         |  |  |  | YES | YES | YES | chr15:38451521-38447521   |
| NM_001146180 | Mtss1         |  |  |  | YES | YES |     | chr15:58916081-58912081   |
| NM_144800    | Mtss1         |  |  |  | YES | YES |     | chr15:58916081-58912081   |
| NM_025567    | Cyc1          |  |  |  | YES | YES |     | chr15:76171452-76175452   |
| NM_198119    | Lrrc24        |  |  |  | YES | YES |     | chr15:76555103-76551103   |
| NM_001161712 | Gcat          |  |  |  | YES | YES | YES | chr15:78858803-78862803   |
| NM_013847    | Gcat          |  |  |  | YES | YES | YES | chr15:78858803-78862803   |
| NM_001347075 | Xpnpep3       |  |  |  | YES | YES | YES | chr15:81228067-81232067   |
| NM_177310    | Xpnpep3       |  |  |  | YES | YES | YES | chr15:81228067-81232067   |
| NM_020507    | Tob2          |  |  |  | YES | YES | YES | chr15:81691256-81687256   |
| NR_027980    | 1700001L05Rik |  |  |  | YES | YES | YES | chr15:83200227-83196227   |
| NM_016714    | Nup50         |  |  |  | YES | YES | YES | chr15:84751357-84755357   |
| NR_077233    | C230037L18Rik |  |  |  | YES | YES | YES | chr15:89304182-89308182   |
| NM_001357893 | Fkbp11        |  |  |  | YES | YES | YES | chr15:98560558-98556558   |
| NM_024169    | Fkbp11        |  |  |  | YES | YES | YES | chr15:98561129-98557129   |
| NM_011654    | Tuba1b        |  |  |  | YES | YES |     | chr15:98767321-98763321   |
| NM_001076789 | Cbx5          |  |  |  | YES | YES | YES | chr15:103072783-103068783 |
| NM_001358950 | Cbx5          |  |  |  | YES | YES | YES | chr15:103072783-103068783 |
| NM_001039129 | Hnrnpa1       |  |  |  | YES | YES | YES | chr15:103068327-103072327 |
| NM_010447    | Hnrnpa1       |  |  |  | YES | YES | YES | chr15:103068327-103072327 |
| NR_104427    | Hnrnpa1       |  |  |  | YES | YES | YES | chr15:103068327-103072327 |
| NR_002885    | Gm10052       |  |  |  | YES | YES | YES | chr15:103068362-103072362 |

|              |         |  |  |  |  |     |     |     |                           |
|--------------|---------|--|--|--|--|-----|-----|-----|---------------------------|
| NR_002883    | Gm5643  |  |  |  |  | YES | YES | YES | chr15:103068384-103072384 |
| NM_031182    | Tfap4   |  |  |  |  | YES | YES |     | chr16:4562220-4558220     |
| NM_145359    | Ubald1  |  |  |  |  | YES | YES | YES | chr16:4882351-4878351     |
| NM_001252437 | Mgrn1   |  |  |  |  | YES | YES | YES | chr16:4883599-4887599     |
| NM_001357061 | Mgrn1   |  |  |  |  | YES | YES | YES | chr16:4883599-4887599     |
| NM_001357062 | Mgrn1   |  |  |  |  | YES | YES | YES | chr16:4883599-4887599     |
| NM_029657    | Mgrn1   |  |  |  |  | YES | YES | YES | chr16:4883599-4887599     |
| NR_037666    | Gm16861 |  |  |  |  | YES | YES | YES | chr16:4942085-4938085     |
| NM_001316715 | Nudt161 |  |  |  |  | YES | YES | YES | chr16:4936610-4940610     |
| NM_025839    | Nudt161 |  |  |  |  | YES | YES | YES | chr16:4936610-4940610     |
| NM_001362486 | Tmem186 |  |  |  |  | YES | YES | YES | chr16:8640090-8636090     |
| NM_025708    | Tmem186 |  |  |  |  | YES | YES | YES | chr16:8640304-8636304     |
| NM_001362485 | Pmm2    |  |  |  |  | YES | YES | YES | chr16:8635299-8639299     |
| NM_016881    | Pmm2    |  |  |  |  | YES | YES | YES | chr16:8635299-8639299     |
| NM_001039521 | Rrn3    |  |  |  |  | YES | YES | YES | chr16:13778291-13782291   |
| NM_001301818 | Fgd4    |  |  |  |  | YES | YES | YES | chr16:16530004-16526004   |
| NM_011239    | Ranbp1  |  |  |  |  | YES | YES |     | chr16:18251287-18247287   |
| NM_001080999 | Trmt2a  |  |  |  |  | YES | YES |     | chr16:18246475-18250475   |
| NM_001081000 | Trmt2a  |  |  |  |  | YES | YES |     | chr16:18246475-18250475   |
| NM_001195205 | Trmt2a  |  |  |  |  | YES | YES |     | chr16:18246475-18250475   |
| NM_001357146 | Trmt2a  |  |  |  |  | YES | YES |     | chr16:18246475-18250475   |
| NM_001302970 | Ap2m1   |  |  |  |  | YES | YES | YES | chr16:20533052-20537052   |
| NM_009679    | Ap2m1   |  |  |  |  | YES | YES | YES | chr16:20533052-20537052   |
| NM_009900    | Cicn2   |  |  |  |  | YES | YES | YES | chr16:20719209-20715209   |
| NM_145632    | Polr2h  |  |  |  |  | YES | YES | YES | chr16:20715398-20719398   |
| NM_001356423 | Polr2h  |  |  |  |  | YES | YES | YES | chr16:20715749-20719749   |
| NM_001081368 | Tbccd1  |  |  |  |  | YES | YES | YES | chr16:22860242-22856242   |
| NM_001316746 | Tbccd1  |  |  |  |  | YES | YES | YES | chr16:22860242-22856242   |
| NM_001190804 | Dnajb11 |  |  |  |  | YES | YES | YES | chr16:22855417-22859417   |
| NM_001190805 | Dnajb11 |  |  |  |  | YES | YES | YES | chr16:22855417-22859417   |
| NM_026400    | Dnajb11 |  |  |  |  | YES | YES | YES | chr16:22855417-22859417   |
| NM_001252435 | Dlg1    |  |  |  |  | YES | YES | YES | chr16:31661028-31665028   |
| NM_001252433 | Dlg1    |  |  |  |  | YES | YES | YES | chr16:31661520-31665520   |
| NM_001252434 | Dlg1    |  |  |  |  | YES | YES | YES | chr16:31661520-31665520   |

|              |               |  |  |  |  |     |     |     |                         |
|--------------|---------------|--|--|--|--|-----|-----|-----|-------------------------|
| NM_001357282 | Dlg1          |  |  |  |  | YES | YES | YES | chr16:31661520-31665520 |
| NM_007862    | Dlg1          |  |  |  |  | YES | YES | YES | chr16:31661520-31665520 |
| NR_045516    | Dlg1          |  |  |  |  | YES | YES | YES | chr16:31661520-31665520 |
| NM_001272070 | Abhd10        |  |  |  |  | YES | YES | YES | chr16:45745568-45741568 |
| NM_172511    | Abhd10        |  |  |  |  | YES | YES | YES | chr16:45745568-45741568 |
| NR_073572    | Abhd10        |  |  |  |  | YES | YES | YES | chr16:45745568-45741568 |
| NM_001134480 | Plcx2         |  |  |  |  | YES | YES | YES | chr16:46013026-46009026 |
| NM_001110275 | ltsn1         |  |  |  |  | YES | YES | YES | chr16:91727115-91731115 |
| NM_001110276 | ltsn1         |  |  |  |  | YES | YES | YES | chr16:91727115-91731115 |
| NM_010587    | ltsn1         |  |  |  |  | YES | YES | YES | chr16:91727115-91731115 |
| NM_028083    | Chaf1b        |  |  |  |  | YES | YES | YES | chr16:93881645-93885645 |
| NM_007834    | Vps26c        |  |  |  |  | YES | YES | YES | chr16:94750736-94746736 |
| NM_145125    | Brwd1         |  |  |  |  | YES | YES | YES | chr16:96306535-96302535 |
| NM_001103179 | Brwd1         |  |  |  |  | YES | YES | YES | chr16:96306535-96302535 |
| NM_176928    | Brwd1         |  |  |  |  | YES | YES | YES | chr16:96306535-96302535 |
| NM_001111017 | Serac1        |  |  |  |  | YES | YES | YES | chr17:6082239-6078239   |
| NM_001360148 | Serac1        |  |  |  |  | YES | YES | YES | chr17:6082239-6078239   |
| NM_177311    | Serac1        |  |  |  |  | YES | YES | YES | chr17:6082239-6078239   |
| NM_181392    | Gtf2h5        |  |  |  |  | YES | YES | YES | chr17:6077327-6081327   |
| NM_001357804 | Gtf2h5        |  |  |  |  | YES | YES | YES | chr17:6077420-6081420   |
| NM_001113533 | Wtap          |  |  |  |  | YES | YES | YES | chr17:13187625-13183625 |
| NM_001113532 | Wtap          |  |  |  |  | YES | YES | YES | chr17:13187625-13183625 |
| NM_175394    | Wtap          |  |  |  |  | YES | YES | YES | chr17:13187905-13183905 |
| NM_008799    | Pdcd2         |  |  |  |  | YES | YES | YES | chr17:15666765-15662765 |
| NR_126484    | 6330415G19Rik |  |  |  |  | YES | YES | YES | chr17:23685265-23689265 |
| NR_126485    | 6330415G19Rik |  |  |  |  | YES | YES | YES | chr17:23685265-23689265 |
| NM_001364895 | Igfals        |  |  |  |  | YES | YES | YES | chr17:25012288-25016288 |
| NM_001364896 | Igfals        |  |  |  |  | YES | YES | YES | chr17:25012675-25016675 |
| NM_008340    | Igfals        |  |  |  |  | YES | YES | YES | chr17:25013191-25017191 |
| NM_001357694 | Ube2i         |  |  |  |  | YES | YES |     | chr17:25413039-25409039 |
| NM_001177609 | Ube2i         |  |  |  |  | YES | YES |     | chr17:25413359-25409359 |
| NM_001177610 | Ube2i         |  |  |  |  | YES | YES |     | chr17:25412876-25408876 |
| NM_011665    | Ube2i         |  |  |  |  | YES | YES |     | chr17:25413755-25409755 |
| NR_027452    | Gm17801       |  |  |  |  | YES | YES |     | chr17:25408568-25412568 |

|              |             |  |  |  |     |     |     |                         |
|--------------|-------------|--|--|--|-----|-----|-----|-------------------------|
| NM_019719    | Stub1       |  |  |  | YES | YES | YES | chr17:25972364-25968364 |
| NR_157361    | Stub1       |  |  |  | YES | YES | YES | chr17:25972364-25968364 |
| NR_157362    | Stub1       |  |  |  | YES | YES | YES | chr17:25972364-25968364 |
| NR_037243    | Mir3082     |  |  |  | YES | YES |     | chr17:25970873-25966873 |
| NM_001025427 | Hmga1       |  |  |  | YES | YES | YES | chr17:27691018-27695018 |
| NM_001039356 | Hmga1       |  |  |  | YES | YES | YES | chr17:27691018-27695018 |
| NM_001166535 | Hmga1       |  |  |  | YES | YES | YES | chr17:27691018-27695018 |
| NM_001166536 | Hmga1       |  |  |  | YES | YES | YES | chr17:27691018-27695018 |
| NM_001166539 | Hmga1       |  |  |  | YES | YES | YES | chr17:27691018-27695018 |
| NM_001166540 | Hmga1       |  |  |  | YES | YES | YES | chr17:27691018-27695018 |
| NM_001166541 | Hmga1       |  |  |  | YES | YES | YES | chr17:27691018-27695018 |
| NM_001166542 | Hmga1       |  |  |  | YES | YES | YES | chr17:27691018-27695018 |
| NM_001166543 | Hmga1       |  |  |  | YES | YES | YES | chr17:27691018-27695018 |
| NM_001166544 | Hmga1       |  |  |  | YES | YES | YES | chr17:27691018-27695018 |
| NM_001166545 | Hmga1       |  |  |  | YES | YES | YES | chr17:27691018-27695018 |
| NM_001166546 | Hmga1       |  |  |  | YES | YES | YES | chr17:27691018-27695018 |
| NM_001166537 | Hmga1       |  |  |  | YES | YES | YES | chr17:27691048-27695048 |
| NM_016660    | Hmga1       |  |  |  | YES | YES | YES | chr17:27691048-27695048 |
| NM_001166476 | Hmga1b      |  |  |  | YES | YES | YES | chr17:27691097-27695097 |
| NM_001166477 | Hmga1b      |  |  |  | YES | YES | YES | chr17:27691097-27695097 |
| NM_001357173 | Stk38       |  |  |  | YES | YES | YES | chr17:29147440-29143440 |
| NM_134115    | Stk38       |  |  |  | YES | YES | YES | chr17:29147440-29143440 |
| NM_001364913 | Pim1        |  |  |  | YES | YES | YES | chr17:29627529-29631529 |
| NM_021322    | Wdr4        |  |  |  | YES | YES | YES | chr17:31651932-31647932 |
| NM_001083891 | Ndufv3      |  |  |  | YES | YES | YES | chr17:31654559-31658559 |
| NM_030087    | Ndufv3      |  |  |  | YES | YES | YES | chr17:31654559-31658559 |
| NM_001346705 | Zfp871      |  |  |  | YES | YES | YES | chr17:32926992-32922992 |
| NM_172458    | Zfp871      |  |  |  | YES | YES | YES | chr17:32927732-32923732 |
| NM_001204973 | Brd2        |  |  |  | YES | YES | YES | chr17:34262052-34258052 |
| NM_010238    | Brd2        |  |  |  | YES | YES | YES | chr17:34261192-34257192 |
| NM_017406    | Atf6b       |  |  |  | YES | YES | YES | chr17:34781590-34785590 |
| NM_033075    | D17H6S56E-5 |  |  |  | YES | YES |     | chr17:35140191-35136191 |
| NM_011690    | Vars        |  |  |  | YES | YES |     | chr17:35135351-35139351 |
| NM_019693    | Ddx39b      |  |  |  | YES | YES | YES | chr17:35376190-35380190 |

|              |               |  |  |  |     |     |     |                         |
|--------------|---------------|--|--|--|-----|-----|-----|-------------------------|
| NM_001252457 | Ddx39b        |  |  |  | YES | YES | YES | chr17:35377261-35381261 |
| NM_001347380 | Mrps18b       |  |  |  | YES | YES | YES | chr17:36055885-36051885 |
| NM_001361453 | Mrps18b       |  |  |  | YES | YES | YES | chr17:36055885-36051885 |
| NM_001361454 | Mrps18b       |  |  |  | YES | YES | YES | chr17:36055885-36051885 |
| NM_001361455 | Mrps18b       |  |  |  | YES | YES | YES | chr17:36055885-36051885 |
| NM_025878    | Mrps18b       |  |  |  | YES | YES | YES | chr17:36055885-36051885 |
| NM_001163818 | Ppp1r10       |  |  |  | YES | YES | YES | chr17:36051640-36055640 |
| NR_035445    | Mir1894       |  |  |  | YES | YES | YES | chr17:36052333-36056333 |
| NM_152810    | Cdc5l         |  |  |  | YES | YES | YES | chr17:45573156-45569156 |
| NR_130960    | B230354K17Rik |  |  |  | YES | YES | YES | chr17:45568279-45572279 |
| NR_130961    | B230354K17Rik |  |  |  | YES | YES | YES | chr17:45568279-45572279 |
| NM_001199115 | Slc29a1       |  |  |  | YES | YES | YES | chr17:45739052-45735052 |
| NM_001356290 | Taf8          |  |  |  | YES | YES | YES | chr17:47641740-47637740 |
| NM_022015    | Taf8          |  |  |  | YES | YES | YES | chr17:47641740-47637740 |
| NM_001164729 | Tomm6         |  |  |  | YES | YES | YES | chr17:47827835-47823835 |
| NM_025365    | Tomm6         |  |  |  | YES | YES | YES | chr17:47827835-47823835 |
| NR_045945    | Tomm6os       |  |  |  | YES | YES | YES | chr17:47822058-47826058 |
| NM_001357909 | Kdm4b         |  |  |  | YES | YES | YES | chr17:56462972-56466972 |
| NM_172132    | Kdm4b         |  |  |  | YES | YES | YES | chr17:56462972-56466972 |
| NM_133801    | Gtf2f1        |  |  |  | YES | YES | YES | chr17:57153211-57149211 |
| NM_001359813 | Crb3          |  |  |  | YES | YES | YES | chr17:57199123-57203123 |
| NM_001359814 | Crb3          |  |  |  | YES | YES | YES | chr17:57199123-57203123 |
| NM_001347408 | Crb3          |  |  |  | YES | YES | YES | chr17:57199153-57203153 |
| NM_177638    | Crb3          |  |  |  | YES | YES | YES | chr17:57199153-57203153 |
| NM_001198949 | Ralbp1        |  |  |  | YES | YES |     | chr17:66236763-66232763 |
| NM_009067    | Ralbp1        |  |  |  | YES | YES |     | chr17:66237595-66233595 |
| NM_026064    | Myl12a        |  |  |  | YES | YES | YES | chr17:71354373-71350373 |
| NM_007566    | Birc6         |  |  |  | YES | YES | YES | chr17:74925134-74929134 |
| NM_028233    | Lrrprc        |  |  |  | YES | YES | YES | chr17:85192626-85188626 |
| NR_015506    | 4833418N02Rik |  |  |  | YES | YES | YES | chr17:87684654-87680654 |
| NM_028639    | Ttc7          |  |  |  | YES | YES | YES | chr17:87679725-87683725 |
| NM_008448    | Kif5b         |  |  |  | YES | YES | YES | chr18:6244022-6240022   |
| NR_035446    | Mir1893       |  |  |  | YES | YES | YES | chr18:6493144-6489144   |
| NM_001252490 | Osbpl1a       |  |  |  | YES | YES | YES | chr18:13024389-13020389 |

|              |          |  |  |  |     |     |     |                         |
|--------------|----------|--|--|--|-----|-----|-----|-------------------------|
| NM_001252491 | Osbpl1a  |  |  |  | YES | YES | YES | chr18:13023722-13019722 |
| NM_001252492 | Osbpl1a  |  |  |  | YES | YES | YES | chr18:13023722-13019722 |
| NM_001252493 | Osbpl1a  |  |  |  | YES | YES | YES | chr18:13023722-13019722 |
| NM_001357396 | Impact   |  |  |  | YES | YES | YES | chr18:13130468-13134468 |
| NM_001100449 | Taf4b    |  |  |  | YES | YES | YES | chr18:14939253-14943253 |
| NM_026301    | Rnf125   |  |  |  | YES | YES |     | chr18:21100615-21104615 |
| NM_153058    | Mapre2   |  |  |  | YES | YES | YES | chr18:23959970-23963970 |
| NM_001081256 | Kdm3b    |  |  |  | YES | YES | YES | chr18:34934161-34938161 |
| NM_010481    | Hspa9    |  |  |  | YES | YES | YES | chr18:35116505-35112505 |
| NM_010771    | Matr3    |  |  |  | YES | YES | YES | chr18:35719311-35723311 |
| NM_026040    | Srfbp1   |  |  |  | YES | YES | YES | chr18:52622846-52626846 |
| NM_178686    | Cep120   |  |  |  | YES | YES | YES | chr18:53906762-53902762 |
| NR_029879    | Mir378a  |  |  |  | YES | YES | YES | chr18:61560054-61556054 |
| NM_172832    | Pcyox1l  |  |  |  | YES | YES | YES | chr18:61869789-61865789 |
| NM_001014981 | Wdr7     |  |  |  | YES | YES | YES | chr18:63865848-63869848 |
| NM_001360837 | Wdr7     |  |  |  | YES | YES | YES | chr18:63865848-63869848 |
| NR_028560    | Scarna17 |  |  |  | YES | YES | YES | chr18:74940609-74936609 |
| NM_177470    | Acaa2    |  |  |  | YES | YES | YES | chr18:74936365-74940365 |
| NR_155535    | Gm20544  |  |  |  | YES | YES | YES | chr18:75529242-75525242 |
| NM_001042660 | Smad7    |  |  |  | YES | YES | YES | chr18:75524518-75528518 |
| NM_026295    | Ctdp1    |  |  |  | YES | YES | YES | chr18:80668931-80664931 |
| NM_013495    | Cpt1a    |  |  |  | YES | YES | YES | chr19:3320800-3324800   |
| NM_001362043 | Gstp3    |  |  |  | YES | YES | YES | chr19:4061947-4057947   |
| NM_144869    | Gstp3    |  |  |  | YES | YES | YES | chr19:4061947-4057947   |
| NM_016666    | Aip      |  |  |  | YES | YES | YES | chr19:4128358-4124358   |
| NM_001078649 | Tmem134  |  |  |  | YES | YES | YES | chr19:4123459-4127459   |
| NM_025889    | Tmem134  |  |  |  | YES | YES | YES | chr19:4123459-4127459   |
| NM_011778    | Coro1b   |  |  |  | YES | YES | YES | chr19:4146162-4150162   |
| NR_157185    | Gm21992  |  |  |  | YES | YES |     | chr19:4814099-4810099   |
| NM_001290127 | Gm21992  |  |  |  | YES | YES |     | chr19:4814134-4810134   |
| NM_001290128 | Gm21992  |  |  |  | YES | YES |     | chr19:4814134-4810134   |
| NM_019869    | Rbm14    |  |  |  | YES | YES |     | chr19:4814134-4810134   |
| NM_027877    | Mus81    |  |  |  | YES | YES | YES | chr19:5490879-5486879   |
| NR_153768    | Mus81    |  |  |  | YES | YES | YES | chr19:5490879-5486879   |



|              |               |  |  |  |     |     |     |                         |
|--------------|---------------|--|--|--|-----|-----|-----|-------------------------|
| NR_153769    | Mus81         |  |  |  | YES | YES | YES | chr19:5490879-5486879   |
| NM_001361921 | Scyl1         |  |  |  | YES | YES | YES | chr19:5773919-5769919   |
| NM_001361922 | Scyl1         |  |  |  | YES | YES | YES | chr19:5773919-5769919   |
| NM_023912    | Scyl1         |  |  |  | YES | YES | YES | chr19:5773919-5769919   |
| NR_155264    | Scyl1         |  |  |  | YES | YES | YES | chr19:5773919-5769919   |
| NM_001358444 | Prdx5         |  |  |  | YES | YES | YES | chr19:6987096-6983096   |
| NM_012021    | Prdx5         |  |  |  | YES | YES | YES | chr19:6987096-6983096   |
| NM_001166370 | Trmt112       |  |  |  | YES | YES | YES | chr19:6981687-6985687   |
| NM_026306    | Trmt112       |  |  |  | YES | YES | YES | chr19:6981687-6985687   |
| NM_010316    | Gng3          |  |  |  | YES | YES |     | chr19:8916236-8912236   |
| NM_001290823 | Bscl2         |  |  |  | YES | YES |     | chr19:8912492-8916492   |
| NM_024256    | B3gat3        |  |  |  | YES | YES | YES | chr19:8992382-8996382   |
| NM_026007    | Eef1g         |  |  |  | YES | YES | YES | chr19:9039030-9043030   |
| NM_146094    | Fads1         |  |  |  | YES | YES | YES | chr19:10254877-10258877 |
| NR_015567    | A930007119Rik |  |  |  | YES | YES | YES | chr19:29598977-29594977 |
| NM_001081319 | Ric1          |  |  |  | YES | YES | YES | chr19:29594271-29598271 |
| NM_001362434 | Kif20b        |  |  |  | YES | YES | YES | chr19:34994347-34998347 |
| NM_183046    | Kif20b        |  |  |  | YES | YES | YES | chr19:34994347-34998347 |
| NM_016854    | Ppp1r3c       |  |  |  | YES | YES | YES | chr19:36813594-36809594 |
| NM_001365054 | Blnk          |  |  |  | YES | YES | YES | chr19:41071211-41067211 |
| NM_008528    | Blnk          |  |  |  | YES | YES | YES | chr19:41071211-41067211 |
| NM_145501    | Pi4k2a        |  |  |  | YES | YES | YES | chr19:42162424-42166424 |
| NM_027106    | Avpi1         |  |  |  | YES | YES | YES | chr19:42205983-42201983 |
| NM_001081225 | Slf2          |  |  |  | YES | YES | YES | chr19:45003108-45007108 |
| NM_172638    | Slf2          |  |  |  | YES | YES | YES | chr19:45003108-45007108 |
| NM_053164    | Mrpl43        |  |  |  | YES | YES | YES | chr19:45083432-45079432 |
| NM_153796    | Twink         |  |  |  | YES | YES | YES | chr19:45078547-45082547 |
| NM_001039351 | Nolc1         |  |  |  | YES | YES | YES | chr19:46147836-46151836 |
| NM_001039352 | Nolc1         |  |  |  | YES | YES | YES | chr19:46147836-46151836 |
| NM_001039353 | Nolc1         |  |  |  | YES | YES | YES | chr19:46147836-46151836 |
| NM_053086    | Nolc1         |  |  |  | YES | YES | YES | chr19:46147836-46151836 |
| NM_010362    | Gsto1         |  |  |  | YES | YES | YES | chr19:47926962-47930962 |
| NM_011050    | Pdcd4         |  |  |  | YES | YES |     | chr19:53964220-53968220 |
| NM_001013376 | Rpp38         |  |  |  | YES | YES | YES | chr2:3252400-3248400    |

|              |               |  |  |  |     |     |     |                        |
|--------------|---------------|--|--|--|-----|-----|-----|------------------------|
| NM_001355207 | Meig1         |  |  |  | YES | YES | YES | chr2:3338901-3334901   |
| NM_001355208 | Meig1         |  |  |  | YES | YES | YES | chr2:3338901-3334901   |
| NM_001355209 | Meig1         |  |  |  | YES | YES | YES | chr2:3338901-3334901   |
| NM_001355210 | Meig1         |  |  |  | YES | YES | YES | chr2:3338369-3334369   |
| NM_025626    | Fam107b       |  |  |  | YES | YES | YES | chr2:3628229-3632229   |
| NM_001356411 | Sec61a2       |  |  |  | YES | YES | YES | chr2:5818978-5814978   |
| NM_021305    | Sec61a2       |  |  |  | YES | YES | YES | chr2:5818978-5814978   |
| NM_001177752 | Pfkfb3        |  |  |  | YES | YES | YES | chr2:11426217-11422217 |
| NM_001177753 | Pfkfb3        |  |  |  | YES | YES | YES | chr2:11426217-11422217 |
| NM_001177754 | Pfkfb3        |  |  |  | YES | YES | YES | chr2:11426217-11422217 |
| NM_001177755 | Pfkfb3        |  |  |  | YES | YES | YES | chr2:11426217-11422217 |
| NM_001177756 | Pfkfb3        |  |  |  | YES | YES | YES | chr2:11426217-11422217 |
| NM_001177757 | Pfkfb3        |  |  |  | YES | YES | YES | chr2:11426217-11422217 |
| NM_133232    | Pfkfb3        |  |  |  | YES | YES | YES | chr2:11426217-11422217 |
| NM_001252560 | Mlit10        |  |  |  | YES | YES |     | chr2:17983711-17987711 |
| NM_001252561 | Mlit10        |  |  |  | YES | YES |     | chr2:17983711-17987711 |
| NR_045538    | Mlit10        |  |  |  | YES | YES |     | chr2:17983711-17987711 |
| NR_045539    | Mlit10        |  |  |  | YES | YES |     | chr2:17983711-17987711 |
| NM_147778    | Commd3        |  |  |  | YES | YES | YES | chr2:18591588-18595588 |
| NM_001031808 | Mrpl41        |  |  |  | YES | YES | YES | chr2:24833118-24829118 |
| NM_153125    | Sec16a        |  |  |  | YES | YES | YES | chr2:26303236-26299236 |
| NR_152207    | 0610009E02Rik |  |  |  | YES | YES | YES | chr2:26298943-26302943 |
| NR_152208    | 0610009E02Rik |  |  |  | YES | YES | YES | chr2:26298943-26302943 |
| NR_152209    | 0610009E02Rik |  |  |  | YES | YES | YES | chr2:26298943-26302943 |
| NM_001271724 | Surf1         |  |  |  | YES | YES | YES | chr2:26774550-26770550 |
| NM_013677    | Surf1         |  |  |  | YES | YES | YES | chr2:26774550-26770550 |
| NR_073420    | Surf1         |  |  |  | YES | YES | YES | chr2:26774550-26770550 |
| NM_013678    | Surf2         |  |  |  | YES | YES | YES | chr2:26769427-26773427 |
| NM_001204875 | Set           |  |  |  | YES | YES | YES | chr2:29919493-29923493 |
| NM_146252    | Tbc1d13       |  |  |  | YES | YES | YES | chr2:29986765-29990765 |
| NM_007760    | Crat          |  |  |  | YES | YES | YES | chr2:30273768-30269768 |
| NM_001362733 | Ptpa          |  |  |  | YES | YES | YES | chr2:30269069-30273069 |
| NM_001362734 | Ptpa          |  |  |  | YES | YES | YES | chr2:30269069-30273069 |
| NM_138748    | Ptpa          |  |  |  | YES | YES | YES | chr2:30269069-30273069 |

|              |         |  |  |  |     |     |     |                          |
|--------------|---------|--|--|--|-----|-----|-----|--------------------------|
| NM_172268    | Nup214  |  |  |  | YES | YES | YES | chr2:31827469-31831469   |
| NM_001159548 | Nr6a1   |  |  |  | YES | YES | YES | chr2:38642535-38638535   |
| NM_001159549 | Nr6a1   |  |  |  | YES | YES | YES | chr2:38642535-38638535   |
| NM_028118    | Wdsub1  |  |  |  | YES | YES | YES | chr2:59723163-59719163   |
| NM_001159636 | Wdsub1  |  |  |  | YES | YES | YES | chr2:59723163-59719163   |
| NM_025633    | Metap1d |  |  |  | YES | YES | YES | chr2:71288894-71292894   |
| NM_001359971 | Hnrnpa3 |  |  |  | YES | YES |     | chr2:75494815-75498815   |
| NM_053263    | Hnrnpa3 |  |  |  | YES | YES |     | chr2:75494815-75498815   |
| NM_146130    | Hnrnpa3 |  |  |  | YES | YES |     | chr2:75494815-75498815   |
| NM_198090    | Hnrnpa3 |  |  |  | YES | YES |     | chr2:75494815-75498815   |
| NR_033513    | Gm6793  |  |  |  | YES | YES |     | chr2:75494846-75498846   |
| NR_029544    | Mir130a |  |  |  | YES | YES | YES | chr2:84583835-84579835   |
| NM_013899    | Timm10  |  |  |  | YES | YES |     | chr2:84664677-84668677   |
| NM_001033451 | Zfp408  |  |  |  | YES | YES | YES | chr2:91492448-91488448   |
| NM_001347175 | Zfp408  |  |  |  | YES | YES | YES | chr2:91492448-91488448   |
| NM_001145902 | Arhgap1 |  |  |  | YES | YES | YES | chr2:91487774-91491774   |
| NM_001359970 | Arhgap1 |  |  |  | YES | YES | YES | chr2:91487774-91491774   |
| NR_027371    | Arhgap1 |  |  |  | YES | YES | YES | chr2:91487774-91491774   |
| NR_027372    | Arhgap1 |  |  |  | YES | YES | YES | chr2:91487774-91491774   |
| NR_027373    | Arhgap1 |  |  |  | YES | YES | YES | chr2:91487774-91491774   |
| NM_178890    | Abtb2   |  |  |  | YES | YES |     | chr2:103403966-103407966 |
| NM_153126    | Nat10   |  |  |  | YES | YES | YES | chr2:103603927-103599927 |
| NM_001111289 | Caprin1 |  |  |  | YES | YES |     | chr2:103639735-103635735 |
| NM_001111290 | Caprin1 |  |  |  | YES | YES |     | chr2:103639735-103635735 |
| NM_001111292 | Caprin1 |  |  |  | YES | YES |     | chr2:103639735-103635735 |
| NM_144804    | Depdc7  |  |  |  | YES | YES | YES | chr2:104585458-104581458 |
| NM_178695    | Prrg4   |  |  |  | YES | YES | YES | chr2:104692507-104688507 |
| NM_026929    | Chac1   |  |  |  | YES | YES | YES | chr2:119174477-119178477 |
| NM_001164274 | Mga     |  |  |  |     | YES | YES | chr2:119720463-119724463 |
| NM_013720    | Mga     |  |  |  |     | YES | YES | chr2:119720463-119724463 |
| NM_145531    | Spg11   |  |  |  | YES | YES | YES | chr2:121946622-121942622 |
| NM_146126    | Sord    |  |  |  | YES | YES | YES | chr2:122058074-122062074 |
| NM_001164325 | Trpm7   |  |  |  | YES | YES | YES | chr2:126704497-126700497 |
| NM_021450    | Trpm7   |  |  |  | YES | YES | YES | chr2:126704497-126700497 |

|              |               |  |  |  |     |     |     |                          |
|--------------|---------------|--|--|--|-----|-----|-----|--------------------------|
| NM_001159593 | Slc20a1       |  |  |  | YES | YES | YES | chr2:129022008-129026008 |
| NM_015747    | Slc20a1       |  |  |  | YES | YES | YES | chr2:129022008-129026008 |
| NM_001311138 | 1700037H04Rik |  |  |  | YES | YES | YES | chr2:130988317-130984317 |
| NM_001361375 | 1700037H04Rik |  |  |  | YES | YES | YES | chr2:130988317-130984317 |
| NM_026091    | 1700037H04Rik |  |  |  | YES | YES | YES | chr2:130988317-130984317 |
| NR_154886    | 1700037H04Rik |  |  |  | YES | YES | YES | chr2:130988317-130984317 |
| NR_154887    | 1700037H04Rik |  |  |  | YES | YES | YES | chr2:130988317-130984317 |
| NM_001291039 | Cds2          |  |  |  | YES | YES |     | chr2:132109174-132113174 |
| NM_001356442 | Trmt6         |  |  |  | YES | YES | YES | chr2:132644290-132640290 |
| NM_001356443 | Trmt6         |  |  |  | YES | YES | YES | chr2:132644290-132640290 |
| NM_001356444 | Trmt6         |  |  |  | YES | YES | YES | chr2:132644290-132640290 |
| NM_175113    | Trmt6         |  |  |  | YES | YES | YES | chr2:132644290-132640290 |
| NM_001291054 | Mcm8          |  |  |  | YES | YES | YES | chr2:132639376-132643376 |
| NM_025676    | Mcm8          |  |  |  | YES | YES | YES | chr2:132639376-132643376 |
| NM_024196    | Tbc1d20       |  |  |  | YES | YES | YES | chr2:152117063-152121063 |
| NR_156111    | Tbc1d20       |  |  |  | YES | YES | YES | chr2:152117063-152121063 |
| NM_025543    | Mcts2         |  |  |  | YES | YES | YES | chr2:152510383-152514383 |
| NM_001291105 | E2f1          |  |  |  | YES | YES | YES | chr2:154397662-154393662 |
| NM_007891    | E2f1          |  |  |  | YES | YES | YES | chr2:154398128-154394128 |
| NM_025699    | Oser1         |  |  |  | YES | YES | YES | chr2:163247706-163243706 |
| NR_151490    | 2900093K20Rik |  |  |  | YES | YES | YES | chr2:163243006-163247006 |
| NM_001252573 | Slc35c2       |  |  |  | YES | YES | YES | chr2:165115787-165111787 |
| NM_001252574 | Slc35c2       |  |  |  | YES | YES | YES | chr2:165115787-165111787 |
| NM_001252575 | Slc35c2       |  |  |  | YES | YES | YES | chr2:165115838-165111838 |
| NM_001363015 | Slc35c2       |  |  |  | YES | YES | YES | chr2:165115838-165111838 |
| NM_001363016 | Slc35c2       |  |  |  | YES | YES | YES | chr2:165115838-165111838 |
| NM_144893    | Slc35c2       |  |  |  | YES | YES | YES | chr2:165115838-165111838 |
| NM_001033196 | Znfx1         |  |  |  | YES | YES |     | chr2:166891015-166887015 |
| NR_138563    | Zfas1         |  |  |  | YES | YES |     | chr2:166885933-166889933 |
| NM_001310086 | Adnp          |  |  |  | YES | YES | YES | chr2:168035112-168031112 |
| NM_001310088 | Adnp          |  |  |  | YES | YES | YES | chr2:168035112-168031112 |
| NM_009628    | Adnp          |  |  |  | YES | YES | YES | chr2:168035112-168031112 |
| NM_001291185 | Aurka         |  |  |  | YES | YES | YES | chr2:172198570-172194570 |
| NM_011497    | Aurka         |  |  |  | YES | YES | YES | chr2:172198570-172194570 |

|              |               |  |  |  |     |     |     |                          |
|--------------|---------------|--|--|--|-----|-----|-----|--------------------------|
| NM_024199    | Cstf1         |  |  |  | YES | YES | YES | chr2:172194002-172198002 |
| NM_019547    | Rbm38         |  |  |  | YES | YES | YES | chr2:172844902-172848902 |
| NM_133849    | Hrh3          |  |  |  | YES | YES |     | chr2:179841612-179837612 |
| NR_102309    | Hrh3          |  |  |  | YES | YES |     | chr2:179841612-179837612 |
| NM_011481    | Srms          |  |  |  | YES | YES | YES | chr2:180950376-180946376 |
| NM_026765    | Uckl1         |  |  |  | YES | YES |     | chr2:181319178-181315178 |
| NM_001357528 | Sec62         |  |  |  | YES | YES | YES | chr3:30689297-30693297   |
| NM_027016    | Sec62         |  |  |  | YES | YES | YES | chr3:30689297-30693297   |
| NM_023644    | Mccc1         |  |  |  | YES | YES | YES | chr3:35902100-35898100   |
| NR_029456    | Mccc1os       |  |  |  | YES | YES | YES | chr3:35896334-35900334   |
| NM_001291044 | Nudt6         |  |  |  | YES | YES | YES | chr3:37321018-37317018   |
| NM_153561    | Nudt6         |  |  |  | YES | YES | YES | chr3:37321018-37317018   |
| NM_001163511 | Spata5        |  |  |  | YES | YES | YES | chr3:37316371-37320371   |
| NM_001310473 | Spata5        |  |  |  | YES | YES | YES | chr3:37316371-37320371   |
| NM_021343    | Spata5        |  |  |  | YES | YES | YES | chr3:37316371-37320371   |
| NM_198657    | Gm5148        |  |  |  | YES | YES | YES | chr3:37625782-37621782   |
| NM_027558    | Pgrmc2        |  |  |  | YES | YES | YES | chr3:40889468-40885468   |
| NR_027955    | 4931440P22Rik |  |  |  | YES | YES | YES | chr3:65335836-65331836   |
| NR_106200    | Mir8120       |  |  |  | YES | YES |     | chr3:65460709-65464709   |
| NM_001162999 | Fnip2         |  |  |  | YES | YES | YES | chr3:79374101-79370101   |
| NR_152118    | 4930589L23Rik |  |  |  | YES | YES | YES | chr3:79369613-79373613   |
| NM_001310605 | Pmf1          |  |  |  | YES | YES | YES | chr3:88216819-88212819   |
| NM_025928    | Pmf1          |  |  |  | YES | YES | YES | chr3:88216819-88212819   |
| NM_001145876 | Slc25a44      |  |  |  | YES | YES | YES | chr3:88231563-88227563   |
| NM_001145877 | Slc25a44      |  |  |  | YES | YES | YES | chr3:88231563-88227563   |
| NM_001281795 | Slc25a44      |  |  |  | YES | YES | YES | chr3:88231563-88227563   |
| NM_001357749 | Slc25a44      |  |  |  | YES | YES | YES | chr3:88231563-88227563   |
| NM_178696    | Slc25a44      |  |  |  | YES | YES | YES | chr3:88231563-88227563   |
| NR_130957    | 4632404H12Rik |  |  |  | YES | YES | YES | chr3:89579822-89575822   |
| NM_028475    | Ubap2l        |  |  |  | YES | YES | YES | chr3:89858902-89854902   |
| NM_153489    | Ubap2l        |  |  |  | YES | YES | YES | chr3:89858902-89854902   |
| NM_001165983 | Ubap2l        |  |  |  | YES | YES | YES | chr3:89858902-89854902   |
| NM_001165984 | Ubap2l        |  |  |  | YES | YES | YES | chr3:89858937-89854937   |
| NM_001357307 | Ubap2l        |  |  |  | YES | YES | YES | chr3:89858937-89854937   |

|              |           |  |  |  |     |     |     |                          |
|--------------|-----------|--|--|--|-----|-----|-----|--------------------------|
| NM_001165985 | Ubap2l    |  |  |  | YES | YES | YES | chr3:89858902-89854902   |
| NM_001165986 | Ubap2l    |  |  |  | YES | YES | YES | chr3:89858937-89854937   |
| NM_001165987 | Ubap2l    |  |  |  | YES | YES | YES | chr3:89858902-89854902   |
| NM_001165988 | Ubap2l    |  |  |  | YES | YES | YES | chr3:89858937-89854937   |
| NM_206924    | Jtb       |  |  |  | YES | YES | YES | chr3:90033018-90037018   |
| NR_106175    | Mir8099-1 |  |  |  | YES | YES | YES | chr3:94945608-94941608   |
| NR_106201    | Mir8099-2 |  |  |  | YES | YES | YES | chr3:94945608-94941608   |
| NM_001355750 | Car14     |  |  |  | YES | YES | YES | chr3:95711108-95707108   |
| NM_001355751 | Car14     |  |  |  | YES | YES | YES | chr3:95711108-95707108   |
| NM_011797    | Car14     |  |  |  | YES | YES | YES | chr3:95711108-95707108   |
| NM_001355752 | Car14     |  |  |  | YES | YES | YES | chr3:95711108-95707108   |
| NM_001165952 | Trim45    |  |  |  | YES | YES |     | chr3:100723915-100727915 |
| NM_001165953 | Trim45    |  |  |  | YES | YES |     | chr3:100723915-100727915 |
| NM_194343    | Trim45    |  |  |  | YES | YES |     | chr3:100723915-100727915 |
| NM_009196    | Slc16a1   |  |  |  | YES | YES | YES | chr3:104440086-104444086 |
| NM_001304719 | Atp5f1    |  |  |  | YES |     | YES | chr3:105765666-105761666 |
| NM_009725    | Atp5f1    |  |  |  | YES |     | YES | chr3:105765666-105761666 |
| NM_027432    | Wdr77     |  |  |  | YES | YES | YES | chr3:105759915-105763915 |
| NM_001289719 | Ampd2     |  |  |  | YES | YES |     | chr3:107892084-107888084 |
| NM_028779    | Ampd2     |  |  |  | YES | YES |     | chr3:107892084-107888084 |
| NM_023214    | Slc30a7   |  |  |  | YES | YES | YES | chr3:115712824-115708824 |
| NM_001163515 | Extl2     |  |  |  | YES | YES | YES | chr3:115707866-115711866 |
| NM_021388    | Extl2     |  |  |  | YES | YES | YES | chr3:115707866-115711866 |
| NM_001163514 | Extl2     |  |  |  | YES | YES | YES | chr3:115708714-115712714 |
| NM_001025438 | Camk2d    |  |  |  | YES | YES |     | chr3:126297368-126301368 |
| NM_001025439 | Camk2d    |  |  |  | YES | YES |     | chr3:126297368-126301368 |
| NM_001293663 | Camk2d    |  |  |  | YES | YES |     | chr3:126297368-126301368 |
| NM_001293664 | Camk2d    |  |  |  | YES | YES |     | chr3:126297368-126301368 |
| NM_001293665 | Camk2d    |  |  |  | YES | YES |     | chr3:126297368-126301368 |
| NM_001293666 | Camk2d    |  |  |  | YES | YES |     | chr3:126297368-126301368 |
| NM_001346635 | Camk2d    |  |  |  | YES | YES |     | chr3:126297368-126301368 |
| NM_001346636 | Camk2d    |  |  |  | YES | YES |     | chr3:126297368-126301368 |
| NM_023813    | Camk2d    |  |  |  | YES | YES |     | chr3:126297368-126301368 |
| NM_007926    | Aimp1     |  |  |  | YES | YES |     | chr3:132349343-132345343 |

|              |               |  |  |  |  |     |     |     |                          |
|--------------|---------------|--|--|--|--|-----|-----|-----|--------------------------|
| NM_001163455 | Tbck          |  |  |  |  | YES | YES |     | chr3:132344607-132348607 |
| NM_001163457 | Mttp          |  |  |  |  | YES | YES | YES | chr3:137808882-137804882 |
| NM_001355051 | Mttp          |  |  |  |  | YES | YES | YES | chr3:137808882-137804882 |
| NM_001355052 | Mttp          |  |  |  |  | YES | YES | YES | chr3:137808882-137804882 |
| NM_175389    | Trmt10a       |  |  |  |  | YES | YES | YES | chr3:137803911-137807911 |
| NM_001348196 | Trmt10a       |  |  |  |  | YES | YES | YES | chr3:137803980-137807980 |
| NM_001348197 | Trmt10a       |  |  |  |  | YES | YES | YES | chr3:137804262-137808262 |
| NM_007409    | Adh1          |  |  |  |  | YES | YES | YES | chr3:137938048-137942048 |
| NR_035481    | Mir1956       |  |  |  |  | YES | YES | YES | chr3:138186884-138190884 |
| NM_013752    | Nbn           |  |  |  |  | YES | YES | YES | chr4:15882613-15886613   |
| NM_026742    | Ndufaf4       |  |  |  |  | YES | YES | YES | chr4:24822729-24826729   |
| NM_001349093 | Smim27        |  |  |  |  | YES | YES | YES | chr4:40214111-40218111   |
| NM_016689    | Aqp3          |  |  |  |  | YES | YES |     | chr4:41047716-41043716   |
| NR_155499    | Gm42274       |  |  |  |  | YES | YES | YES | chr4:41705145-41701145   |
| NM_016658    | Galt          |  |  |  |  | YES | YES | YES | chr4:41699600-41703600   |
| NM_001302511 | Galt          |  |  |  |  | YES | YES | YES | chr4:41700582-41704582   |
| NM_028053    | Tmem38b       |  |  |  |  | YES | YES | YES | chr4:53836416-53840416   |
| NM_001045528 | Fkbp15        |  |  |  |  | YES | YES | YES | chr4:62024130-62020130   |
| NM_001355385 | Fkbp15        |  |  |  |  | YES | YES | YES | chr4:62024130-62020130   |
| NM_175090    | Slc31a1       |  |  |  |  | YES | YES | YES | chr4:62019234-62023234   |
| NM_001356354 | Tmem268       |  |  |  |  | YES | YES | YES | chr4:63217296-63221296   |
| NM_001356355 | Tmem268       |  |  |  |  | YES | YES | YES | chr4:63217296-63221296   |
| NM_144905    | Tmem268       |  |  |  |  | YES | YES | YES | chr4:63218760-63222760   |
| NM_007408    | Plin2         |  |  |  |  | YES | YES | YES | chr4:86318463-86314463   |
| NM_001081184 | Focad         |  |  |  |  | YES | YES | YES | chr4:87738033-87742033   |
| NR_045776    | 9530080O11Rik |  |  |  |  | YES | YES | YES | chr4:95636846-95632846   |
| NR_045777    | 9530080O11Rik |  |  |  |  | YES | YES | YES | chr4:95636226-95632226   |
| NM_030014    | Hook1         |  |  |  |  | YES | YES | YES | chr4:95631569-95635569   |
| NM_001285852 | Sgip1         |  |  |  |  | YES | YES |     | chr4:102430239-102434239 |
| NM_001285859 | Sgip1         |  |  |  |  | YES | YES |     | chr4:102430239-102434239 |
| NM_001285860 | Sgip1         |  |  |  |  | YES | YES |     | chr4:102430239-102434239 |
| NM_001285862 | Sgip1         |  |  |  |  | YES | YES |     | chr4:102430239-102434239 |
| NM_144906    | Sgip1         |  |  |  |  | YES | YES |     | chr4:102430239-102434239 |
| NM_011034    | Prdx1         |  |  |  |  | YES | YES |     | chr4:116355703-116359703 |

|              |         |  |  |  |  |     |     |     |                          |
|--------------|---------|--|--|--|--|-----|-----|-----|--------------------------|
| NM_001004178 | Frg2f1  |  |  |  |  | YES | YES | YES | chr4:119213874-119209874 |
| NM_001290696 | Foxj3   |  |  |  |  | YES | YES | YES | chr4:119209765-119213765 |
| NM_172699    | Foxj3   |  |  |  |  | YES | YES | YES | chr4:119209765-119213765 |
| NM_194060    | Foxo6   |  |  |  |  | YES | YES |     | chr4:119962366-119958366 |
| NM_023423    | Akirin1 |  |  |  |  | YES | YES | YES | chr4:123430042-123426042 |
| NM_001145827 | Stk40   |  |  |  |  | YES | YES | YES | chr4:125778700-125782700 |
| NM_028800    | Stk40   |  |  |  |  | YES | YES | YES | chr4:125778700-125782700 |
| NR_028537    | Snord99 |  |  |  |  | YES | YES |     | chr4:131864117-131868117 |
| NM_001290725 | Ppp1r8  |  |  |  |  | YES | YES | YES | chr4:132401584-132397584 |
| NM_001355198 | Ppp1r8  |  |  |  |  | YES | YES | YES | chr4:132401549-132397549 |
| NM_001355199 | Ppp1r8  |  |  |  |  | YES | YES | YES | chr4:132401549-132397549 |
| NM_146154    | Ppp1r8  |  |  |  |  | YES | YES | YES | chr4:132401584-132397584 |
| NM_001163792 | Fam76a  |  |  |  |  | YES | YES | YES | chr4:132480966-132476966 |
| NM_145553    | Fam76a  |  |  |  |  | YES | YES | YES | chr4:132480966-132476966 |
| NM_025667    | Tmem222 |  |  |  |  | YES | YES | YES | chr4:132836205-132832205 |
| NR_110978    | Tmem222 |  |  |  |  | YES | YES | YES | chr4:132836205-132832205 |
| NM_172876    | Gpatch3 |  |  |  |  | YES | YES | YES | chr4:133128159-133132159 |
| NM_001363070 | Arid1a  |  |  |  |  | YES | YES | YES | chr4:133315184-133311184 |
| NM_016957    | Hmgn2   |  |  |  |  | YES | YES |     | chr4:133526406-133522406 |
| NM_023665    | Rsrp1   |  |  |  |  | YES | YES | YES | chr4:134477039-134481039 |
| NM_026780    | Syf2    |  |  |  |  | YES | YES | YES | chr4:134484394-134488394 |
| NM_001130477 | Srrm1   |  |  |  |  | YES | YES | YES | chr4:134911629-134907629 |
| NM_016799    | Srrm1   |  |  |  |  | YES | YES | YES | chr4:134911629-134907629 |
| NM_022980    | Rcan3   |  |  |  |  | YES | YES | YES | chr4:134992220-134988220 |
| NM_008254    | Hmgcl   |  |  |  |  | YES | YES | YES | chr4:135499862-135503862 |
| NM_001357529 | Hmgcl   |  |  |  |  | YES | YES | YES | chr4:135500820-135504820 |
| NM_001357530 | Hmgcl   |  |  |  |  | YES | YES | YES | chr4:135500820-135504820 |
| NM_001305423 | Tmco4   |  |  |  |  | YES | YES | YES | chr4:138525697-138529697 |
| NM_029857    | Tmco4   |  |  |  |  | YES | YES | YES | chr4:138526319-138530319 |
| NM_001355730 | Zfp933  |  |  |  |  | YES | YES | YES | chr4:147225027-147221027 |
| NM_198619    | Zfp933  |  |  |  |  | YES | YES | YES | chr4:147225027-147221027 |
| NM_001003893 | Masp2   |  |  |  |  | YES | YES | YES | chr4:147974152-147978152 |
| NM_010767    | Masp2   |  |  |  |  | YES | YES | YES | chr4:147974152-147978152 |
| NM_025582    | Fam213b |  |  |  |  | YES | YES |     | chr4:154275652-154271652 |



|              |         |  |  |  |  |     |     |     |                          |
|--------------|---------|--|--|--|--|-----|-----|-----|--------------------------|
| NM_177186    | Slc35e2 |  |  |  |  | YES | YES | YES | chr4:154973024-154977024 |
| NM_080445    | B3galt6 |  |  |  |  | YES | YES |     | chr4:155369287-155365287 |
| NM_011341    | Sdf4    |  |  |  |  | YES | YES |     | chr4:155364451-155368451 |
| NM_001302467 | Sdf4    |  |  |  |  | YES | YES |     | chr4:155364513-155368513 |
| NM_001302469 | Sdf4    |  |  |  |  | YES | YES |     | chr4:155364761-155368761 |
| NM_001302468 | Sdf4    |  |  |  |  | YES | YES |     | chr4:155364945-155368945 |
| NM_172991    | Rbm48   |  |  |  |  | YES | YES | YES | chr5:3599047-3595047     |
| NM_001293806 | Pex1    |  |  |  |  | YES | YES | YES | chr5:3593565-3597565     |
| NM_027777    | Pex1    |  |  |  |  | YES | YES | YES | chr5:3593565-3597565     |
| NM_010305    | Gnai1   |  |  |  |  | YES | YES |     | chr5:17868731-17864731   |
| NM_001359963 | Napepld |  |  |  |  | YES | YES | YES | chr5:21209714-21205714   |
| NM_001359964 | Napepld |  |  |  |  | YES | YES | YES | chr5:21209714-21205714   |
| NM_001359965 | Napepld |  |  |  |  | YES | YES | YES | chr5:21209940-21205940   |
| NM_178728    | Napepld |  |  |  |  | YES | YES | YES | chr5:21209714-21205714   |
| NM_001310524 | Khk     |  |  |  |  | YES | YES | YES | chr5:31221431-31225431   |
| NM_001310525 | Khk     |  |  |  |  | YES | YES | YES | chr5:31221431-31225431   |
| NM_001349066 | Khk     |  |  |  |  | YES | YES | YES | chr5:31221431-31225431   |
| NM_008439    | Khk     |  |  |  |  | YES | YES | YES | chr5:31221431-31225431   |
| NM_001294302 | Preb    |  |  |  |  | YES | YES |     | chr5:31265200-31261200   |
| NM_016703    | Preb    |  |  |  |  | YES | YES |     | chr5:31265200-31261200   |
| NM_001177621 | Slc5a6  |  |  |  |  | YES | YES | YES | chr5:31353435-31349435   |
| NM_001177622 | Slc5a6  |  |  |  |  | YES | YES | YES | chr5:31353797-31349797   |
| NM_001360022 | Slc5a6  |  |  |  |  | YES | YES | YES | chr5:31352952-31348952   |
| NM_177870    | Slc5a6  |  |  |  |  | YES | YES | YES | chr5:31352952-31348952   |
| NM_001177379 | Cpeb2   |  |  |  |  | YES | YES | YES | chr5:43622201-43626201   |
| NM_175937    | Cpeb2   |  |  |  |  | YES | YES | YES | chr5:43622201-43626201   |
| NM_024236    | Qdpr    |  |  |  |  | YES | YES | YES | chr5:45843968-45839968   |
| NM_001347357 | Rfc1    |  |  |  |  | YES | YES | YES | chr5:65729378-65725378   |
| NM_001347358 | Rfc1    |  |  |  |  | YES | YES | YES | chr5:65729378-65725378   |
| NM_011258    | Rfc1    |  |  |  |  | YES | YES | YES | chr5:65729378-65725378   |
| NM_133697    | Smim14  |  |  |  |  | YES | YES | YES | chr5:65886574-65882574   |
| NM_172146    | Ppat    |  |  |  |  | YES | YES | YES | chr5:77383103-77379103   |
| NM_001356971 | Paics   |  |  |  |  | YES | YES | YES | chr5:77377826-77381826   |
| NM_001356972 | Paics   |  |  |  |  | YES | YES | YES | chr5:77377826-77381826   |

|              |               |  |  |  |     |     |     |                          |
|--------------|---------------|--|--|--|-----|-----|-----|--------------------------|
| NM_001356973 | Paics         |  |  |  | YES | YES | YES | chr5:77377826-77381826   |
| NM_001356974 | Paics         |  |  |  | YES | YES | YES | chr5:77377826-77381826   |
| NM_025939    | Paics         |  |  |  | YES | YES | YES | chr5:77377826-77381826   |
| NM_001289776 | Rufy3         |  |  |  | YES | YES |     | chr5:89010037-89014037   |
| NM_001289777 | Rufy3         |  |  |  | YES | YES |     | chr5:89010037-89014037   |
| NM_001359208 | Rufy3         |  |  |  | YES | YES |     | chr5:89010037-89014037   |
| NM_001359209 | Rufy3         |  |  |  | YES | YES |     | chr5:89010037-89014037   |
| NM_027530    | Rufy3         |  |  |  | YES | YES |     | chr5:89010037-89014037   |
| NM_026735    | Mob1b         |  |  |  | YES | YES | YES | chr5:89147395-89151395   |
| NM_001359995 | Nup54         |  |  |  | YES | YES | YES | chr5:92866725-92862725   |
| NM_183392    | Nup54         |  |  |  | YES | YES | YES | chr5:92866725-92862725   |
| NM_017367    | Ccni          |  |  |  | YES | YES | YES | chr5:93638021-93634021   |
| NM_029363    | 2010109A12Rik |  |  |  | YES | YES | YES | chr5:93633043-93637043   |
| NR_049192    | Mir5619       |  |  |  | YES | YES | YES | chr5:104474521-104478521 |
| NM_001255991 | Btbd8         |  |  |  | YES | YES | YES | chr5:107864515-107868515 |
| NM_001359835 | Hscb          |  |  |  | YES | YES | YES | chr5:111271296-111267296 |
| NM_153571    | Hscb          |  |  |  | YES | YES | YES | chr5:111271296-111267296 |
| NR_153348    | Hscb          |  |  |  | YES | YES | YES | chr5:111271296-111267296 |
| NM_001363308 | Chek2         |  |  |  | YES | YES | YES | chr5:111266501-111270501 |
| NM_016681    | Chek2         |  |  |  | YES | YES | YES | chr5:111266501-111270501 |
| NM_001159650 | Crybb3        |  |  |  | YES | YES | YES | chr5:113513104-113509104 |
| NM_001359004 | Crybb3        |  |  |  | YES | YES | YES | chr5:113513104-113509104 |
| NM_001359005 | Crybb3        |  |  |  | YES | YES | YES | chr5:113513104-113509104 |
| NM_001359006 | Crybb3        |  |  |  | YES | YES | YES | chr5:113513104-113509104 |
| NM_001359007 | Crybb3        |  |  |  | YES | YES | YES | chr5:113513104-113509104 |
| NM_001359008 | Crybb3        |  |  |  | YES | YES | YES | chr5:113513104-113509104 |
| NM_001359009 | Crybb3        |  |  |  | YES | YES | YES | chr5:113513104-113509104 |
| NM_021352    | Crybb3        |  |  |  | YES | YES | YES | chr5:113513104-113509104 |
| NM_011677    | Ung           |  |  |  | YES | YES | YES | chr5:114578664-114582664 |
| NR_027810    | 1110006O24Rik |  |  |  | YES | YES |     | chr5:116084325-116080325 |
| NM_001109902 | Rnft2         |  |  |  | YES | YES | YES | chr5:118697534-118693534 |
| NM_172998    | Rnft2         |  |  |  | YES | YES | YES | chr5:118697370-118693370 |
| NM_001081236 | 2410131K14Rik |  |  |  | YES | YES | YES | chr5:118692735-118696735 |
| NM_009656    | Aldh2         |  |  |  | YES | YES |     | chr5:122046333-122042333 |

|              |          |  |  |  |  |     |     |     |                          |
|--------------|----------|--|--|--|--|-----|-----|-----|--------------------------|
| NM_001308450 | Aldh2    |  |  |  |  | YES | YES |     | chr5:122046333-122042333 |
| NM_009125    | Atxn2    |  |  |  |  | YES | YES | YES | chr5:122159117-122163117 |
| NM_009722    | Atp2a2   |  |  |  |  | YES | YES |     | chr5:122954734-122950734 |
| NR_027838    | Atp2a2   |  |  |  |  | YES | YES |     | chr5:122954734-122950734 |
| NM_001110140 | Atp2a2   |  |  |  |  | YES | YES |     | chr5:122954734-122950734 |
| NM_026000    | Psmc9    |  |  |  |  | YES | YES |     | chr5:123675698-123679698 |
| NM_019770    | Tmed2    |  |  |  |  | YES | YES | YES | chr5:124988299-124992299 |
| NM_001359408 | Zbed5    |  |  |  |  | YES | YES | YES | chr5:130369092-130373092 |
| NM_183088    | Zbed5    |  |  |  |  | YES | YES | YES | chr5:130369092-130373092 |
| NM_027854    | Tmem248  |  |  |  |  | YES | YES |     | chr5:130695704-130699704 |
| NM_001359852 | Gtf2ird2 |  |  |  |  | YES | YES | YES | chr5:134657407-134661407 |
| NM_053266    | Gtf2ird2 |  |  |  |  | YES | YES | YES | chr5:134657407-134661407 |
| NM_001081462 | Gtf2ird1 |  |  |  |  | YES | YES |     | chr5:134935086-134931086 |
| NM_001081463 | Gtf2ird1 |  |  |  |  | YES | YES |     | chr5:134935086-134931086 |
| NM_001081464 | Gtf2ird1 |  |  |  |  | YES | YES |     | chr5:134935086-134931086 |
| NM_001081465 | Gtf2ird1 |  |  |  |  | YES | YES |     | chr5:134934632-134930632 |
| NM_001081466 | Gtf2ird1 |  |  |  |  | YES | YES |     | chr5:134935086-134931086 |
| NM_001081467 | Gtf2ird1 |  |  |  |  | YES | YES |     | chr5:134935086-134931086 |
| NM_001081468 | Gtf2ird1 |  |  |  |  | YES | YES |     | chr5:134935086-134931086 |
| NM_001081469 | Gtf2ird1 |  |  |  |  | YES | YES |     | chr5:134935086-134931086 |
| NM_001081470 | Gtf2ird1 |  |  |  |  | YES | YES |     | chr5:134935086-134931086 |
| NM_001244936 | Gtf2ird1 |  |  |  |  | YES | YES |     | chr5:134935086-134931086 |
| NM_001347488 | Gtf2ird1 |  |  |  |  | YES | YES |     | chr5:134935086-134931086 |
| NM_020331    | Gtf2ird1 |  |  |  |  | YES | YES |     | chr5:134935086-134931086 |
| NM_009902    | Cldn3    |  |  |  |  | YES | YES | YES | chr5:135459583-135463583 |
| NR_026907    | Wbscr25  |  |  |  |  | YES | YES | YES | chr5:135479720-135475720 |
| NM_001190437 | Abhd11   |  |  |  |  | YES | YES | YES | chr5:135482521-135486521 |
| NM_145215    | Abhd11   |  |  |  |  | YES | YES | YES | chr5:135482668-135486668 |
| NR_033794    | Abhd11   |  |  |  |  | YES | YES | YES | chr5:135482825-135486825 |
| NM_001363307 | Tbl2     |  |  |  |  | YES | YES | YES | chr5:135623055-135627055 |
| NM_013763    | Tbl2     |  |  |  |  | YES | YES | YES | chr5:135623055-135627055 |
| NM_001039385 | Vgf      |  |  |  |  | YES | YES | YES | chr5:137503664-137507664 |
| NM_001359611 | Slc12a9  |  |  |  |  | YES | YES | YES | chr5:137780588-137776588 |
| NM_028753    | Pop7     |  |  |  |  | YES | YES | YES | chr5:137946157-137942157 |

|              |               |  |  |  |     |     |     |                          |
|--------------|---------------|--|--|--|-----|-----|-----|--------------------------|
| NM_001363271 | Pdgfa         |  |  |  | YES | YES |     | chr5:139473398-139469398 |
| NM_008808    | Pdgfa         |  |  |  | YES | YES |     | chr5:139473398-139469398 |
| NM_181066    | Brat1         |  |  |  | YES | YES | YES | chr5:141178464-141182464 |
| NR_074085    | Brat1         |  |  |  | YES | YES | YES | chr5:141178464-141182464 |
| NM_001276287 | Brat1         |  |  |  | YES | YES | YES | chr5:141178519-141182519 |
| NR_102383    | 5930430L01Rik |  |  |  | YES | YES | YES | chr5:149809290-149805290 |
| NR_102384    | 5930430L01Rik |  |  |  | YES | YES | YES | chr5:149809291-149805291 |
| NM_001013378 | Uspl1         |  |  |  | YES | YES | YES | chr5:149993635-149997635 |
| NM_001115149 | Uspl1         |  |  |  | YES | YES | YES | chr5:149993635-149997635 |
| NM_001115150 | Uspl1         |  |  |  | YES | YES | YES | chr5:149993635-149997635 |
| NM_001115151 | Uspl1         |  |  |  | YES | YES | YES | chr5:149993635-149997635 |
| NM_001115153 | Uspl1         |  |  |  | YES | YES | YES | chr5:149993635-149997635 |
| NM_001286824 | Uspl1         |  |  |  | YES | YES | YES | chr5:149993635-149997635 |
| NM_001286825 | Uspl1         |  |  |  | YES | YES | YES | chr5:149993635-149997635 |
| NM_001359956 | Uspl1         |  |  |  | YES | YES | YES | chr5:149993635-149997635 |
| NM_001359957 | Uspl1         |  |  |  | YES | YES | YES | chr5:149993635-149997635 |
| NM_001167750 | Vps50         |  |  |  | YES | YES | YES | chr6:3445892-3449892     |
| NM_001167751 | Vps50         |  |  |  | YES | YES | YES | chr6:3445892-3449892     |
| NM_024260    | Vps50         |  |  |  | YES | YES | YES | chr6:3445892-3449892     |
| NR_110471    | Lncpint       |  |  |  | YES | YES | YES | chr6:31170974-31166974   |
| NR_110469    | Lncpint       |  |  |  | YES | YES | YES | chr6:31170974-31166974   |
| NR_110470    | Lncpint       |  |  |  | YES | YES | YES | chr6:31170974-31166974   |
| NR_040257    | 2210408F21Rik |  |  |  | YES | YES | YES | chr6:31167850-31171850   |
| NR_040258    | 2210408F21Rik |  |  |  | YES | YES | YES | chr6:31167850-31171850   |
| NR_040259    | 2210408F21Rik |  |  |  | YES | YES | YES | chr6:31167850-31171850   |
| NR_040260    | 2210408F21Rik |  |  |  | YES | YES | YES | chr6:31167850-31171850   |
| NR_040261    | 2210408F21Rik |  |  |  | YES | YES | YES | chr6:31167850-31171850   |
| NR_040262    | 2210408F21Rik |  |  |  | YES | YES | YES | chr6:31167850-31171850   |
| NM_001164412 | Cnot4         |  |  |  | YES | YES | YES | chr6:35086237-35082237   |
| NM_001164413 | Cnot4         |  |  |  | YES | YES | YES | chr6:35086237-35082237   |
| NM_001164414 | Cnot4         |  |  |  | YES | YES | YES | chr6:35086237-35082237   |
| NM_001164411 | Cnot4         |  |  |  | YES | YES | YES | chr6:35086237-35082237   |
| NM_016877    | Cnot4         |  |  |  | YES | YES | YES | chr6:35086237-35082237   |
| NM_001311112 | Ccdc126       |  |  |  | YES | YES | YES | chr6:49266772-49270772   |

|              |         |  |  |  |     |     |     |                        |
|--------------|---------|--|--|--|-----|-----|-----|------------------------|
| NM_175098    | Ccdc126 |  |  |  | YES | YES | YES | chr6:49266772-49270772 |
| NM_001172216 | Fam221a |  |  |  | YES | YES | YES | chr6:49315237-49319237 |
| NM_172727    | Fam221a |  |  |  | YES | YES | YES | chr6:49315237-49319237 |
| NR_152256    | Gm15050 |  |  |  | YES | YES |     | chr6:52120379-52124379 |
| NM_001362209 | Kbtbd2  |  |  |  | YES | YES |     | chr6:56749707-56745707 |
| NM_001362211 | Kbtbd2  |  |  |  | YES | YES |     | chr6:56749707-56745707 |
| NM_001362212 | Kbtbd2  |  |  |  | YES | YES |     | chr6:56749707-56745707 |
| NM_001081145 | Tigd2   |  |  |  | YES | YES |     | chr6:59156363-59160363 |
| NR_106192    | Mir8112 |  |  |  | YES | YES | YES | chr6:71219164-71223164 |
| NM_001354706 | Krcc1   |  |  |  | YES | YES | YES | chr6:71219170-71223170 |
| NM_145568    | Krcc1   |  |  |  | YES | YES | YES | chr6:71219512-71223512 |
| NM_001038695 | Kdm3a   |  |  |  | YES | YES | YES | chr6:71585411-71581411 |
| NM_001362200 | Kdm3a   |  |  |  | YES | YES | YES | chr6:71585411-71581411 |
| NM_173001    | Kdm3a   |  |  |  | YES | YES | YES | chr6:71585180-71581180 |
| NM_001253681 | lmmt    |  |  |  | YES | YES | YES | chr6:71778813-71782813 |
| NM_001253686 | lmmt    |  |  |  | YES | YES | YES | chr6:71778813-71782813 |
| NM_001253687 | lmmt    |  |  |  | YES | YES | YES | chr6:71778813-71782813 |
| NM_001253688 | lmmt    |  |  |  | YES | YES | YES | chr6:71778813-71782813 |
| NM_001253689 | lmmt    |  |  |  | YES | YES | YES | chr6:71778813-71782813 |
| NM_001362134 | lmmt    |  |  |  | YES | YES | YES | chr6:71778813-71782813 |
| NM_001362136 | lmmt    |  |  |  | YES | YES | YES | chr6:71778813-71782813 |
| NM_001362137 | lmmt    |  |  |  | YES | YES | YES | chr6:71778813-71782813 |
| NM_001362138 | lmmt    |  |  |  | YES | YES | YES | chr6:71778813-71782813 |
| NM_029673    | lmmt    |  |  |  | YES | YES | YES | chr6:71778813-71782813 |
| NM_023160    | Nat8f1  |  |  |  | YES | YES | YES | chr6:85868171-85864171 |
| NM_001362065 | Tprkb   |  |  |  | YES | YES | YES | chr6:85863464-85867464 |
| NM_001364555 | C87436  |  |  |  | YES | YES | YES | chr6:86385869-86389869 |
| NM_001364558 | C87436  |  |  |  | YES | YES | YES | chr6:86385869-86389869 |
| NM_146170    | C87436  |  |  |  | YES | YES | YES | chr6:86385891-86389891 |
| NM_001243741 | C87436  |  |  |  | YES | YES | YES | chr6:86386139-86390139 |
| NM_001243742 | C87436  |  |  |  | YES | YES | YES | chr6:86386139-86390139 |
| NM_001364556 | C87436  |  |  |  | YES | YES | YES | chr6:86386167-86390167 |
| NM_001364557 | C87436  |  |  |  | YES | YES | YES | chr6:86386167-86390167 |
| NR_157222    | C87436  |  |  |  | YES | YES | YES | chr6:86386167-86390167 |

|              |               |  |  |  |     |     |     |                          |
|--------------|---------------|--|--|--|-----|-----|-----|--------------------------|
| NM_011865    | Pcbp1         |  |  |  | YES | YES | YES | chr6:86478683-86474683   |
| NR_037960    | 1600020E01Rik |  |  |  | YES | YES | YES | chr6:86474823-86478823   |
| NR_037961    | 1600020E01Rik |  |  |  | YES | YES | YES | chr6:86474894-86478894   |
| NM_133928    | Chchd4        |  |  |  | YES | YES | YES | chr6:91425917-91421917   |
| NM_028766    | Tmem43        |  |  |  | YES | YES | YES | chr6:91421200-91425200   |
| NR_104577    | 0610040F04Rik |  |  |  | YES | YES |     | chr6:108613428-108609428 |
| NM_001355266 | Thumpd3       |  |  |  | YES | YES | YES | chr6:112993795-112997795 |
| NM_008188    | Thumpd3       |  |  |  | YES | YES | YES | chr6:112993795-112997795 |
| NM_028385    | Setd5         |  |  |  | YES | YES | YES | chr6:113025132-113029132 |
| NM_001356371 | Vgll4         |  |  |  | YES | YES | YES | chr6:114921721-114917721 |
| NR_131013    | 9530062K07Rik |  |  |  | YES | YES | YES | chr6:116160511-116156511 |
| NM_026585    | Washc2        |  |  |  | YES | YES | YES | chr6:116155550-116159550 |
| NM_001166427 | Hnrnpf        |  |  |  | YES | YES | YES | chr6:117864811-117868811 |
| NM_001128151 | Cecr2         |  |  |  | YES | YES | YES | chr6:120613831-120617831 |
| NM_138747    | Nop2          |  |  |  | YES | YES | YES | chr6:125079400-125083400 |
| NM_008084    | Gapdh         |  |  |  | YES | YES | YES | chr6:125118291-125114291 |
| NM_001346512 | Parp11        |  |  |  | YES | YES | YES | chr6:127401144-127405144 |
| NM_001362186 | Parp11        |  |  |  | YES | YES | YES | chr6:127401144-127405144 |
| NM_001362187 | Parp11        |  |  |  | YES | YES | YES | chr6:127401144-127405144 |
| NM_181402    | Parp11        |  |  |  | YES | YES | YES | chr6:127401144-127405144 |
| NR_045270    | 1700101111Rik |  |  |  | YES | YES | YES | chr6:129485802-129481802 |
| NM_177787    | Slc15a5       |  |  |  | YES | YES | YES | chr6:138030937-138026937 |
| NM_026281    | Tm7sf3        |  |  |  | YES | YES |     | chr6:146585614-146581614 |
| NM_029767    | Rps9          |  |  |  | YES | YES | YES | chr7:3653142-3657142     |
| NM_198631    | Zc3h4         |  |  |  | YES | YES | YES | chr7:16984044-16988044   |
| NM_172739    | Arhgap35      |  |  |  | YES | YES | YES | chr7:17202842-17198842   |
| NM_001127324 | Ercc1         |  |  |  | YES | YES |     | chr7:19927919-19931919   |
| NM_007948    | Ercc1         |  |  |  | YES | YES |     | chr7:19927919-19931919   |
| NM_010719    | Lipe          |  |  |  | YES | YES | YES | chr7:26183506-26179506   |
| NM_007533    | Bckdha        |  |  |  | YES | YES |     | chr7:26446280-26442280   |
| NM_138586    | Exosc5        |  |  |  | YES | YES |     | chr7:26441671-26445671   |
| NR_104358    | Exosc5        |  |  |  | YES | YES |     | chr7:26441671-26445671   |
| NM_001357767 | Egln2         |  |  |  | YES | YES | YES | chr7:27953247-27949247   |
| NM_053208    | Egln2         |  |  |  | YES | YES | YES | chr7:27954321-27950321   |

|              |               |  |  |  |     |     |     |                        |
|--------------|---------------|--|--|--|-----|-----|-----|------------------------|
| NM_001046637 | Snrpa         |  |  |  | YES | YES | YES | chr7:27983279-27979279 |
| NM_001285825 | Snrpa         |  |  |  | YES | YES | YES | chr7:27983790-27979790 |
| NM_015782    | Snrpa         |  |  |  | YES | YES | YES | chr7:27983790-27979790 |
| NM_027215    | Tmem147       |  |  |  | YES | YES | YES | chr7:31517053-31513053 |
| NM_011680    | Usf2          |  |  |  | YES | YES |     | chr7:31744322-31740322 |
| NM_008820    | Pepd          |  |  |  | YES | YES | YES | chr7:35694925-35698925 |
| NR_033567    | E130304I02Rik |  |  |  | YES | YES |     | chr7:36585110-36589110 |
| NM_001360674 | Zfp788        |  |  |  | YES | YES | YES | chr7:48886400-48890400 |
| NM_001360675 | Zfp788        |  |  |  | YES | YES | YES | chr7:48886400-48890400 |
| NM_001360677 | Zfp788        |  |  |  | YES | YES | YES | chr7:48886400-48890400 |
| NM_001360678 | Zfp788        |  |  |  | YES | YES | YES | chr7:48886400-48890400 |
| NM_001360680 | Zfp788        |  |  |  | YES | YES | YES | chr7:48886400-48890400 |
| NM_001360681 | Zfp788        |  |  |  | YES | YES | YES | chr7:48886400-48890400 |
| NM_001360683 | Zfp788        |  |  |  | YES | YES | YES | chr7:48886400-48890400 |
| NM_023363    | Zfp788        |  |  |  | YES | YES | YES | chr7:48886400-48890400 |
| NM_001360684 | Zfp788        |  |  |  | YES | YES | YES | chr7:48887659-48891659 |
| NM_001008422 | Scaf1         |  |  |  | YES | YES |     | chr7:52274119-52270119 |
| NM_009101    | Rras          |  |  |  | YES | YES |     | chr7:52270811-52274811 |
| NM_013725    | Rps11         |  |  |  | YES | YES | YES | chr7:52382259-52378259 |
| NR_000004    | Snord35b      |  |  |  | YES | YES | YES | chr7:52380981-52376981 |
| NR_001277    | Snord33       |  |  |  | YES | YES | YES | chr7:52384815-52380815 |
| NR_039581    | Mir5121       |  |  |  | YES | YES | YES | chr7:52384861-52380861 |
| NR_000002    | Snord32a      |  |  |  | YES | YES | YES | chr7:52385333-52381333 |
| NM_025330    | Hsd17b14      |  |  |  | YES | YES |     | chr7:52807797-52811797 |
| NM_001013368 | E2f8          |  |  |  | YES | YES |     | chr7:56138911-56134911 |
| NM_001360812 | E2f8          |  |  |  | YES | YES |     | chr7:56139466-56135466 |
| NR_155436    | Gm2788        |  |  |  | YES | YES |     | chr7:56134169-56138169 |
| NM_018752    | Trpm1         |  |  |  | YES | YES |     | chr7:71327844-71331844 |
| NM_026483    | Mphosph10     |  |  |  | YES | YES | YES | chr7:71539622-71535622 |
| NM_001355124 | Mcee          |  |  |  | YES | YES | YES | chr7:71535007-71539007 |
| NM_028626    | Mcee          |  |  |  | YES | YES | YES | chr7:71535007-71539007 |
| NM_001360135 | Sema4b        |  |  |  | YES | YES | YES | chr7:87340826-87344826 |
| NM_001291275 | Cib1          |  |  |  | YES | YES | YES | chr7:87380191-87376191 |
| NM_001291276 | Cib1          |  |  |  | YES | YES | YES | chr7:87380191-87376191 |

|              |               |  |  |  |  |     |     |     |                          |
|--------------|---------------|--|--|--|--|-----|-----|-----|--------------------------|
| NM_011870    | Cib1          |  |  |  |  | YES | YES | YES | chr7:87380191-87376191   |
| NM_178752    | Gdpgp1        |  |  |  |  | YES | YES | YES | chr7:87375278-87379278   |
| NR_038175    | 2610206C17Rik |  |  |  |  | YES | YES | YES | chr7:91835649-91839649   |
| NR_046006    | 2310010J17Rik |  |  |  |  | YES | YES | YES | chr7:97280484-97276484   |
| NR_046007    | 2310010J17Rik |  |  |  |  | YES | YES | YES | chr7:97280946-97276946   |
| NM_025460    | Tmem126a      |  |  |  |  | YES | YES | YES | chr7:97608213-97604213   |
| NR_157050    | Tmem126a      |  |  |  |  | YES | YES | YES | chr7:97608213-97604213   |
| NM_001162918 | Ccdc90b       |  |  |  |  | YES | YES | YES | chr7:99707158-99711158   |
| NM_025515    | Ccdc90b       |  |  |  |  | YES | YES | YES | chr7:99707158-99711158   |
| NM_029078    | Pcf11         |  |  |  |  | YES | YES |     | chr7:99820922-99816922   |
| NM_153591    | Nars2         |  |  |  |  | YES | YES | YES | chr7:104097536-104101536 |
| NM_001024619 | Tsku          |  |  |  |  | YES | YES | YES | chr7:105512298-105508298 |
| NM_001168539 | Tsku          |  |  |  |  | YES | YES | YES | chr7:105512338-105508338 |
| NM_001168540 | Tsku          |  |  |  |  | YES | YES | YES | chr7:105512298-105508298 |
| NM_001168541 | Tsku          |  |  |  |  | YES | YES | YES | chr7:105512298-105508298 |
| NM_001360748 | Rnf121        |  |  |  |  | YES | YES |     | chr7:109216179-109212179 |
| NM_029211    | Rnf121        |  |  |  |  | YES | YES |     | chr7:109216179-109212179 |
| NM_008905    | Ppfbp2        |  |  |  |  | YES | YES | YES | chr7:114736064-114740064 |
| NM_020616    | Akip1         |  |  |  |  | YES | YES | YES | chr7:116844691-116848691 |
| NM_001362172 | lpo7          |  |  |  |  | YES | YES | YES | chr7:117159264-117163264 |
| NM_181517    | lpo7          |  |  |  |  | YES | YES | YES | chr7:117159264-117163264 |
| NM_001355058 | Wee1          |  |  |  |  | YES | YES | YES | chr7:117263072-117267072 |
| NM_009516    | Wee1          |  |  |  |  | YES | YES | YES | chr7:117263072-117267072 |
| NM_028758    | Gga2          |  |  |  |  | YES | YES | YES | chr7:129167212-129163212 |
| NR_045614    | 4930413G21Rik |  |  |  |  | YES | YES | YES | chr7:130116473-130112473 |
| NR_030674    | Gm4532        |  |  |  |  | YES | YES | YES | chr7:134379144-134375144 |
| NM_001360912 | Zfp553        |  |  |  |  | YES | YES | YES | chr7:134374074-134378074 |
| NM_146201    | Zfp553        |  |  |  |  | YES | YES | YES | chr7:134374074-134378074 |
| NM_009266    | Sephs2        |  |  |  |  | YES | YES | YES | chr7:134420073-134416073 |
| NM_030226    | 9130019O22Rik |  |  |  |  | YES | YES | YES | chr7:134533180-134529180 |
| NM_133351    | Prss8         |  |  |  |  | YES | YES | YES | chr7:135076127-135072127 |
| NM_001302085 | Uros          |  |  |  |  | YES | YES | YES | chr7:140903478-140899478 |
| NM_009479    | Uros          |  |  |  |  | YES | YES | YES | chr7:140903478-140899478 |
| NR_153416    | Uros          |  |  |  |  | YES | YES | YES | chr7:140903478-140899478 |



|              |               |  |  |  |     |     |     |                          |
|--------------|---------------|--|--|--|-----|-----|-----|--------------------------|
| NM_001302086 | Uros          |  |  |  | YES | YES | YES | chr7:140903478-140899478 |
| NM_025392    | Bccip         |  |  |  | YES | YES | YES | chr7:140898515-140902515 |
| NM_053119    | Echs1         |  |  |  | YES | YES | YES | chr7:147304820-147300820 |
| NM_199301    | Mtg1          |  |  |  | YES | YES | YES | chr7:147320962-147324962 |
| NM_011875    | Psmc13        |  |  |  | YES | YES |     | chr7:148065792-148069792 |
| NM_001360657 | Rplp2         |  |  |  | YES | YES | YES | chr7:148631049-148635049 |
| NM_001360658 | Rplp2         |  |  |  | YES | YES | YES | chr7:148631049-148635049 |
| NM_026020    | Rplp2         |  |  |  | YES | YES | YES | chr7:148631049-148635049 |
| NR_034049    | Snora52       |  |  |  | YES | YES | YES | chr7:148632201-148636201 |
| NM_011288    | Mrpl23        |  |  |  | YES | YES | YES | chr7:149716436-149720436 |
| NM_001081212 | Irs2          |  |  |  | YES | YES | YES | chr8:11011429-11007429   |
| NM_011227    | Rab20         |  |  |  | YES | YES |     | chr8:11480999-11476999   |
| NR_126558    | E230013L22Rik |  |  |  | YES | YES |     | chr8:11475428-11479428   |
| NM_001281974 | Ankrd10       |  |  |  | YES | YES | YES | chr8:11638257-11634257   |
| NM_001281975 | Ankrd10       |  |  |  | YES | YES | YES | chr8:11638257-11634257   |
| NM_133971    | Ankrd10       |  |  |  | YES | YES | YES | chr8:11638257-11634257   |
| NM_001167967 | Ankrd10       |  |  |  | YES | YES | YES | chr8:11638257-11634257   |
| NR_030781    | Ankrd10       |  |  |  | YES | YES | YES | chr8:11637536-11633536   |
| NR_106097    | Mir7238       |  |  |  | YES | YES | YES | chr8:11638236-11634236   |
| NM_001347316 | Fbxo25        |  |  |  | YES | YES | YES | chr8:13905238-13909238   |
| NM_001359061 | Fbxo25        |  |  |  | YES | YES | YES | chr8:13905238-13909238   |
| NM_025785    | Fbxo25        |  |  |  | YES | YES | YES | chr8:13905238-13909238   |
| NM_012000    | Cln8          |  |  |  | YES | YES | YES | chr8:14886035-14890035   |
| NM_145592    | Dkk4          |  |  |  | YES | YES | YES | chr8:23732014-23736014   |
| NM_001080813 | Rab11fip1     |  |  |  | YES | YES | YES | chr8:28287618-28283618   |
| NM_029423    | Rab11fip1     |  |  |  | YES | YES | YES | chr8:28287618-28283618   |
| NM_001364450 | Ppp1r3b       |  |  |  | YES | YES | YES | chr8:36436312-36440312   |
| NM_001364451 | Ppp1r3b       |  |  |  | YES | YES | YES | chr8:36436312-36440312   |
| NM_177741    | Ppp1r3b       |  |  |  | YES | YES | YES | chr8:36436312-36440312   |
| NM_001364452 | Ppp1r3b       |  |  |  | YES | YES | YES | chr8:36437215-36441215   |
| NM_001081150 | Lonrf1        |  |  |  | YES | YES | YES | chr8:37315070-37311070   |
| NM_021788    | Sap30         |  |  |  | YES | YES | YES | chr8:59969157-59965157   |
| NR_126553    | 2500002B13Rik |  |  |  | YES | YES | YES | chr8:59964259-59968259   |
| NR_126555    | 2500002B13Rik |  |  |  | YES | YES | YES | chr8:59964259-59968259   |

|              |         |  |  |  |     |     |     |                          |
|--------------|---------|--|--|--|-----|-----|-----|--------------------------|
| NM_153054    | Slc18a1 |  |  |  | YES | YES |     | chr8:71615621-71611621   |
| NM_001025586 | Nr2c2ap |  |  |  | YES | YES | YES | chr8:72652725-72656725   |
| NM_001025587 | Nr2c2ap |  |  |  | YES | YES | YES | chr8:72652725-72656725   |
| NR_104434    | Nr2c2ap |  |  |  | YES | YES | YES | chr8:72652725-72656725   |
| NM_133972    | Armc6   |  |  |  | YES | YES | YES | chr8:72760821-72756821   |
| NM_001168290 | Sugp2   |  |  |  | YES | YES | YES | chr8:72755624-72759624   |
| NM_172755    | Sugp2   |  |  |  | YES | YES | YES | chr8:72755624-72759624   |
| NM_001357181 | Slc27a1 |  |  |  | YES | YES | YES | chr8:74090995-74094995   |
| NM_001357182 | Slc27a1 |  |  |  | YES | YES | YES | chr8:74091992-74095992   |
| NM_027485    | Med26   |  |  |  | YES | YES | YES | chr8:75074709-75070709   |
| NM_018771    | Gipc1   |  |  |  | YES | YES | YES | chr8:86174076-86178076   |
| NM_008416    | Junb    |  |  |  | YES | YES |     | chr8:87505147-87501147   |
| NM_001167991 | Hook2   |  |  |  | YES | YES | YES | chr8:87511984-87515984   |
| NM_001363497 | Hook2   |  |  |  | YES | YES | YES | chr8:87511984-87515984   |
| NM_001363498 | Hook2   |  |  |  | YES | YES | YES | chr8:87511984-87515984   |
| NM_133255    | Hook2   |  |  |  | YES | YES | YES | chr8:87511984-87515984   |
| NR_156707    | Hook2   |  |  |  | YES | YES | YES | chr8:87511984-87515984   |
| NM_026760    | Trir    |  |  |  | YES | YES |     | chr8:87548231-87552231   |
| NM_008630    | Mt2     |  |  |  | YES | YES | YES | chr8:96694017-96698017   |
| NM_001357205 | Herpud1 |  |  |  |     | YES | YES | chr8:96907828-96911828   |
| NM_022331    | Herpud1 |  |  |  |     | YES | YES | chr8:96907828-96911828   |
| NM_008187    | Cfap20  |  |  |  | YES | YES | YES | chr8:97961269-97957269   |
| NM_173432    | Pskh1   |  |  |  | YES | YES |     | chr8:108421873-108425873 |
| NM_176838    | Esrp2   |  |  |  | YES | YES | YES | chr8:108663374-108659374 |
| NM_001361562 | Ist1    |  |  |  | YES | YES | YES | chr8:112219694-112215694 |
| NM_028018    | Ist1    |  |  |  | YES | YES | YES | chr8:112219694-112215694 |
| NR_155034    | Ist1    |  |  |  | YES | YES | YES | chr8:112219694-112215694 |
| NM_001363380 | Zfp821  |  |  |  | YES | YES | YES | chr8:112216651-112220651 |
| NM_001363384 | Zfp821  |  |  |  | YES | YES | YES | chr8:112216651-112220651 |
| NM_001301211 | Ap1g1   |  |  |  | YES | YES | YES | chr8:112299982-112303982 |
| NM_009677    | Ap1g1   |  |  |  | YES | YES | YES | chr8:112299982-112303982 |
| NM_001190786 | Ddx19b  |  |  |  | YES |     | YES | chr8:113558151-113554151 |
| NM_146217    | Aars    |  |  |  | YES | YES | YES | chr8:113555241-113559241 |
| NM_001037665 | Zfp1    |  |  |  | YES | YES | YES | chr8:114164842-114168842 |

|              |               |  |  |  |     |     |     |                          |
|--------------|---------------|--|--|--|-----|-----|-----|--------------------------|
| NM_001358993 | Zfp1          |  |  |  | YES | YES | YES | chr8:114164842-114168842 |
| NM_011742    | Zfp1          |  |  |  | YES | YES | YES | chr8:114164842-114168842 |
| NR_156445    | Zfp1          |  |  |  | YES | YES | YES | chr8:114164842-114168842 |
| NR_156446    | Zfp1          |  |  |  | YES | YES | YES | chr8:114164842-114168842 |
| NM_028131    | Cenpn         |  |  |  | YES | YES | YES | chr8:119443139-119447139 |
| NM_021441    | Taf1c         |  |  |  | YES | YES | YES | chr8:122131640-122127640 |
| NM_028883    | Tldc1         |  |  |  | YES | YES |     | chr8:122304816-122300816 |
| NM_198671    | Gse1          |  |  |  | YES |     | YES | chr8:123010265-123014265 |
| NM_007428    | Agt           |  |  |  | YES | YES | YES | chr8:127096107-127092107 |
| NM_025615    | 2810004N23Rik |  |  |  | YES | YES | YES | chr8:127389429-127385429 |
| NM_010322    | Gnpat         |  |  |  | YES | YES | YES | chr8:127384432-127388432 |
| NM_001310688 | Ntpcr         |  |  |  | YES | YES | YES | chr8:128255602-128259602 |
| NM_025636    | Ntpcr         |  |  |  | YES | YES | YES | chr8:128255602-128259602 |
| NM_027823    | Arhgap42      |  |  |  | YES | YES |     | chr9:9241513-9237513     |
| NM_001364533 | Med17         |  |  |  | YES | YES | YES | chr9:15086850-15082850   |
| NM_144933    | Med17         |  |  |  | YES | YES | YES | chr9:15086850-15082850   |
| NM_010333    | S1pr2         |  |  |  | YES | YES | YES | chr9:20783737-20779737   |
| NM_010493    | Icam1         |  |  |  | YES | YES |     | chr9:20817883-20821883   |
| NM_172763    | Zfp809        |  |  |  | YES | YES | YES | chr9:22027646-22031646   |
| NR_028420    | Zfp809        |  |  |  | YES | YES | YES | chr9:22027646-22031646   |
| NM_001164624 | Zfp809        |  |  |  | YES | YES | YES | chr9:22027655-22031655   |
| NM_020586    | Herpud2       |  |  |  | YES | YES | YES | chr9:24958780-24954780   |
| NM_009178    | St3gal4       |  |  |  | YES | YES | YES | chr9:34926949-34922949   |
| NR_029475    | 4930581F22Rik |  |  |  | YES | YES | YES | chr9:34921812-34925812   |
| NM_212445    | Kdelc2        |  |  |  | YES | YES | YES | chr9:53189627-53193627   |
| NM_001025375 | Wdr61         |  |  |  | YES | YES |     | chr9:54584856-54580856   |
| NM_001025376 | Wdr61         |  |  |  | YES | YES |     | chr9:54584856-54580856   |
| NM_023191    | Wdr61         |  |  |  | YES | YES |     | chr9:54584856-54580856   |
| NM_172924    | Peak1         |  |  |  | YES | YES | YES | chr9:56268357-56264357   |
| NM_025812    | Hmg20a        |  |  |  | YES | YES | YES | chr9:56263925-56267925   |
| NM_007747    | Cox5a         |  |  |  | YES | YES | YES | chr9:57366538-57370538   |
| NM_001293673 | Nptn          |  |  |  | YES | YES | YES | chr9:58427546-58431546   |
| NM_001357751 | Nptn          |  |  |  | YES | YES | YES | chr9:58427546-58431546   |
| NM_009145    | Nptn          |  |  |  | YES | YES | YES | chr9:58427546-58431546   |

|              |               |  |  |  |     |     |     |                          |
|--------------|---------------|--|--|--|-----|-----|-----|--------------------------|
| NR_151824    | Nptn          |  |  |  | YES | YES | YES | chr9:58427546-58431546   |
| NM_001083927 | Tle3          |  |  |  | YES | YES | YES | chr9:61217672-61221672   |
| NM_001083928 | Tle3          |  |  |  | YES | YES | YES | chr9:61217672-61221672   |
| NM_009389    | Tle3          |  |  |  | YES | YES | YES | chr9:61217672-61221672   |
| NM_018853    | Rplp1         |  |  |  | YES | YES | YES | chr9:61764817-61760817   |
| NM_172536    | Zfp609        |  |  |  | YES | YES |     | chr9:65677871-65673871   |
| NM_026674    | Aph1c         |  |  |  | YES | YES |     | chr9:66685013-66681013   |
| NM_001357494 | Rnf111        |  |  |  | YES | YES |     | chr9:70353685-70349685   |
| NM_010357    | Gsta4         |  |  |  | YES | YES |     | chr9:78037272-78041272   |
| NM_001168240 | Irak1bp1      |  |  |  | YES | YES | YES | chr9:82720912-82724912   |
| NM_022986    | Irak1bp1      |  |  |  | YES | YES | YES | chr9:82720912-82724912   |
| NM_011636    | Plscr1        |  |  |  | YES | YES | YES | chr9:92142531-92146531   |
| NM_001357445 | Nmnat3        |  |  |  | YES | YES | YES | chr9:98194488-98198488   |
| NM_001357446 | Nmnat3        |  |  |  | YES | YES | YES | chr9:98194488-98198488   |
| NM_001357449 | Nmnat3        |  |  |  | YES | YES | YES | chr9:98194488-98198488   |
| NM_001357451 | Nmnat3        |  |  |  | YES | YES | YES | chr9:98194488-98198488   |
| NM_001357452 | Nmnat3        |  |  |  | YES | YES | YES | chr9:98194488-98198488   |
| NM_144533    | Nmnat3        |  |  |  | YES | YES | YES | chr9:98194488-98198488   |
| NM_001311150 | Parp3         |  |  |  | YES | YES | YES | chr9:106381780-106377780 |
| NM_145619    | Parp3         |  |  |  | YES | YES | YES | chr9:106381780-106377780 |
| NM_145620    | Rrp9          |  |  |  | YES | YES | YES | chr9:106377139-106381139 |
| NM_008138    | Gnai2         |  |  |  | YES | YES | YES | chr9:107540174-107536174 |
| NM_001199217 | Slc38a3       |  |  |  | YES | YES | YES | chr9:107572230-107568230 |
| NM_023805    | Slc38a3       |  |  |  | YES | YES | YES | chr9:107572230-107568230 |
| NM_001311156 | Tcta          |  |  |  | YES | YES |     | chr9:108210990-108206990 |
| NM_133986    | Tcta          |  |  |  | YES | YES |     | chr9:108210990-108206990 |
| NM_001313961 | Rhoa          |  |  |  | YES | YES |     | chr9:108206627-108210627 |
| NM_001313962 | Rhoa          |  |  |  | YES | YES |     | chr9:108206627-108210627 |
| NM_053216    | 1700102P08Rik |  |  |  | YES | YES | YES | chr9:108292664-108296664 |
| NM_023247    | Ndutf3        |  |  |  | YES | YES | YES | chr9:108472267-108468267 |
| NR_029577    | Mir191        |  |  |  | YES | YES | YES | chr9:108468149-108472149 |
| NR_029947    | Mir425        |  |  |  | YES | YES | YES | chr9:108468607-108472607 |
| NR_033215    | 3000002C10Rik |  |  |  | YES | YES | YES | chr9:109736445-109732445 |
| NM_018757    | Nme6          |  |  |  | YES | YES | YES | chr9:109732807-109736807 |

|              |               |  |  |  |  |     |     |     |                          |
|--------------|---------------|--|--|--|--|-----|-----|-----|--------------------------|
| NM_001081043 | Ptpn23        |  |  |  |  | YES | YES | YES | chr9:110313214-110309214 |
| NM_175380    | Gpd1l         |  |  |  |  | YES | YES |     | chr9:114845605-114841605 |
| NM_001033209 | Xylb          |  |  |  |  | YES | YES | YES | chr9:119263998-119267998 |
| NM_001199568 | Xylb          |  |  |  |  | YES | YES | YES | chr9:119263998-119267998 |
| NM_001359699 | Xylb          |  |  |  |  | YES | YES | YES | chr9:119263998-119267998 |
| NM_028976    | Gorasp1       |  |  |  |  | YES | YES | YES | chr9:119849176-119845176 |
| NM_028735    | Ttc21a        |  |  |  |  | YES | YES | YES | chr9:119844223-119848223 |
| NM_028894    | Lonrf3        |  |  |  |  | YES | YES | YES | chrX:33865903-33869903   |
| NM_029951    | C330007P06Rik |  |  |  |  | YES | YES | YES | chrX:34406741-34402741   |
| NM_138607    | Fam50a        |  |  |  |  | YES | YES | YES | chrX:71555871-71559871   |
| NM_008828    | Pgk1          |  |  |  |  | YES | YES |     | chrX:103379938-103383938 |
| NM_001291865 | Sat1          |  |  |  |  | YES | YES | YES | chrX:151653492-151649492 |
| NM_009121    | Sat1          |  |  |  |  | YES | YES | YES | chrX:151653492-151649492 |

**Appendix Table 2.** Primers used for RT-PCR analysis.

| <b>Gene</b>                  |         | <b>Sequences (5'-&gt;3')</b> |
|------------------------------|---------|------------------------------|
| <i>TFEB</i><br>(Human/mouse) | forward | GGTGCAGTCCTACCTGGAGA         |
|                              | reverse | GTGGGCAGCAAACCTTGTTCC        |
| <i>Tfe3</i>                  | forward | AGGATCAAAGAGCTGGGCAC         |
|                              | reverse | CCGGCTCTCCAGGTCTTTG          |
| <i>Rev-erba</i>              | forward | CTACTGGCTCCCTCACCCAGGA       |
|                              | reverse | GACACTCGGCTGCTGTCTTCCA       |
| <i>Bmal1</i>                 | forward | GGACTTCGCCTCTACCTGTTCA       |
|                              | reverse | AACCATGTGCGAGTGCAGGCCGC      |
| <i>Clock</i>                 | forward | CACTCTCACAGCCCCACTGTAC       |
|                              | reverse | CCCCACAAGCTACAGGAGCAGT       |
| <i>Per2</i>                  | forward | TGATCGAGACGCCTGTGCTCGT       |
|                              | reverse | CTCCACGGGTTGATGAAGCTGG       |
| <i>Lc3B</i>                  | forward | GCTTGCAGCTCAATGCTAAC         |
|                              | reverse | CCTGCGAGGCATAAACCATGTA       |
| <i>RragD</i>                 | forward | GCTGGAGAATCTGCTGAACA         |
|                              | reverse | CACAGCAGAGCTCGTACGTC         |
| <i>Gabarap</i>               | forward | CAAAGAGGAGCATCCGTTGAG        |
|                              | reverse | TTGTCCAGGTCTCCTATCCGAG       |
| <i>CtsL</i>                  | forward | GTGGACTGTTCTCACGCTCAAG       |
|                              | reverse | TCCGTCCTTCGCTTCATAGG         |
| <i>Bnip3</i>                 | forward | TTCCACTAGCACCTTCTGATGA       |
|                              | reverse | GAACACCGCATTTACAGAACAA       |
| <i>Atg5</i>                  | forward | AAGTCTGTCTCCGCAGTC           |
|                              | reverse | TGAAGAAAGTTATCTGGGTAGCTCA    |
| <i>Atg3</i>                  | forward | GGGTGTAATCACCCCAGAAG         |
|                              | reverse | TGTTGGACAGTGGTGGACTAA        |
| <i>Atp6v0c</i>               | forward | GACTGATGGCATCACCTCTAC        |
|                              | reverse | CAGGATCATGCCACGAACAGT        |
| <i>Ulk1</i>                  | forward | AAGTTCGAGTTCTCTCGCAAG        |
|                              | reverse | CGATGTTTTTCGTGCTTTAGTTCC     |
| <i>Cyp27a1</i>               | forward | GTATCTGGCTACCTGCACTTC        |
|                              | reverse | TCTGGGCTCTTTGAAAGGTG         |
| <i>Crat</i>                  | forward | AGAGCCTGTTGGCATCCTAACC       |
|                              | reverse | TTGTCCAGGCACACGGTGAAGA       |
| <i>Npas2</i>                 | forward | TGGCCTGAGCCTCACCACGA         |

|                            |         |                          |
|----------------------------|---------|--------------------------|
|                            | reverse | GCAACAGCCTGAGCTGCCGA     |
| <i>Dbp</i>                 | forward | CTGGCCCGAGTCTTTTTGC      |
|                            | reverse | CCAGGTCCACGTATTCCACG     |
| <i>Hprt1</i>               | forward | CTGGTGAAAAGGACCTCTCGAAG  |
|                            | reverse | CCAGTTTCACTAATGACACAAACG |
| <i>Beta2-microglobulin</i> | forward | GGTCTTTCTGGTGCTTGTCT     |
|                            | reverse | TATGTTTCGGCTTCCCATTCT    |
| <i>Actin</i>               | forward | TGTGACGTTGACATCCGTAA     |
|                            | reverse | GCTAGGAGCCAGAGCAGTAA     |
| <i>RS16</i>                | forward | AGGAGCGATTTGCTGGTGTGG    |
|                            | reverse | GCTACCAGGGCCTTTGAGATG    |

**Appendix Table 3.** Primary antibodies used for immuno-blots.

| <b>Antigen</b>   | <b>Species in which the Ab was raised</b> | <b>Source</b>                 |
|------------------|-------------------------------------------|-------------------------------|
| TFEB             | Rabbit                                    | Bethyl Laboratories           |
| TFE3             | Rabbit                                    | Sigma                         |
| Beta-ACTIN       | Mouse                                     | Novus Biological              |
| GAPDH            | Mouse                                     | Santa Cruz                    |
| H3               | Rabbit                                    | Cell signaling                |
| P-S6             | Rabbit                                    | Cell signaling                |
| S6               | Rabbit                                    | Cell signaling                |
| LC3A/B           | Rabbit                                    | Cell signaling                |
| P62/SQSTM1       | Rabbit                                    | MBL International Corporation |
| GABARAP          | Rabbit                                    | Cell signaling                |
| ATG5             | Rabbit                                    | Cell signaling                |
| REV-ERB $\alpha$ | Mouse                                     | Santa Cruz                    |
| FLAG             | Mouse                                     | Sigma                         |



**Appendix Table 4:** Primers used for ChIP-RT-PCR analysis.

| <b>Gene</b>            |         | <b>Sequences (5'-&gt;3')</b> |
|------------------------|---------|------------------------------|
| <i>RragD</i> E-box     | forward | AGGCTGAGCTGCCTTTCTC          |
|                        | reverse | CACGTGCATAAACTTCCTTCA        |
| <i>CtsI</i> E-box      | forward | CTCGACAACAAGGGCCTATC         |
|                        | reverse | AGGGCAGGTAGGGGAATCTA         |
| <i>Gabarap</i> E-box   | forward | GTGTTGGCACTCCAGCAGTA         |
|                        | reverse | AGAAAAGGGCGGAGAATCAC         |
| <i>Rev-erba</i> E-box1 | forward | AGGACCTCAGAGCACTTTCC         |
|                        | reverse | ACTGGCATAGCACGGGGATA         |
| <i>Rev-erba</i> E-box2 | forward | TCTCTCCTCCCAGCTTGTCT         |
|                        | reverse | TACTGCTCCGTGGAAGATCA         |
| <i>Rev-erba</i> E-box3 | forward | GCTGCTGGAAAAGTGTGTCA         |
|                        | reverse | AATCTCAACCGCCTTTTGC          |
