# Supplementary material
Source: PubMed Central journal article supplement (PMC6576167)

**FIGURE 1A**

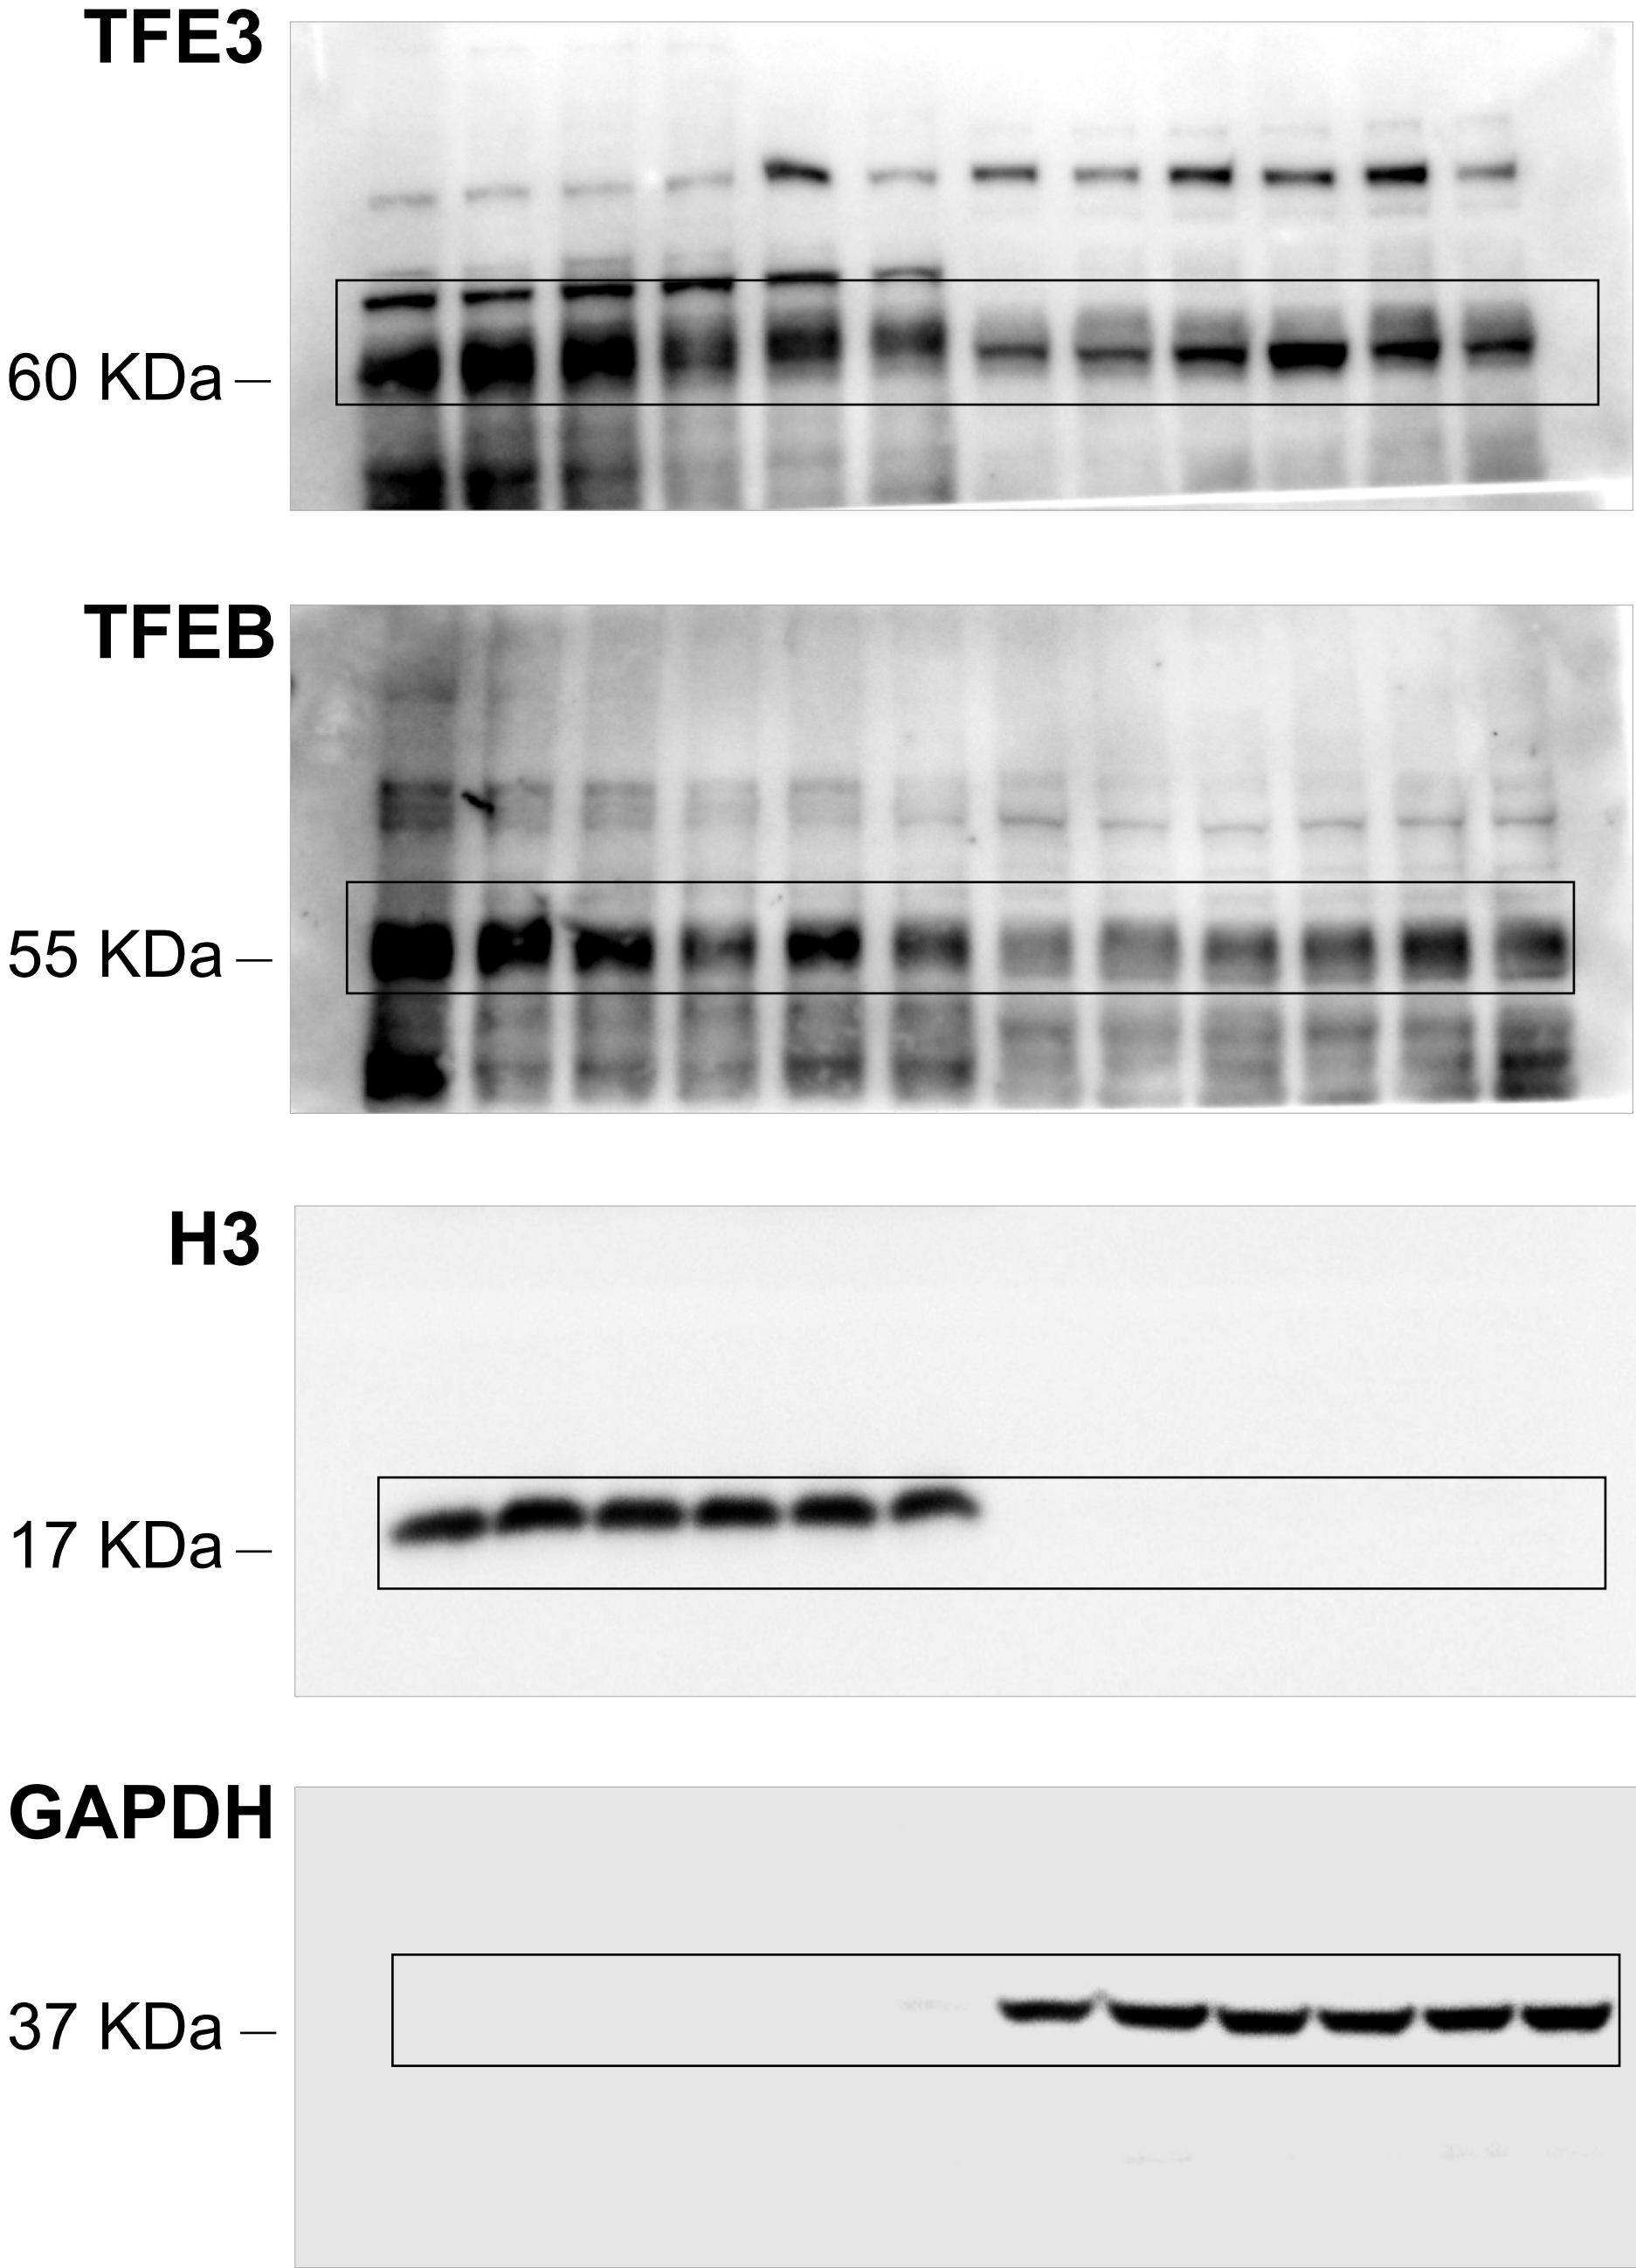

**FIGURE 1E**

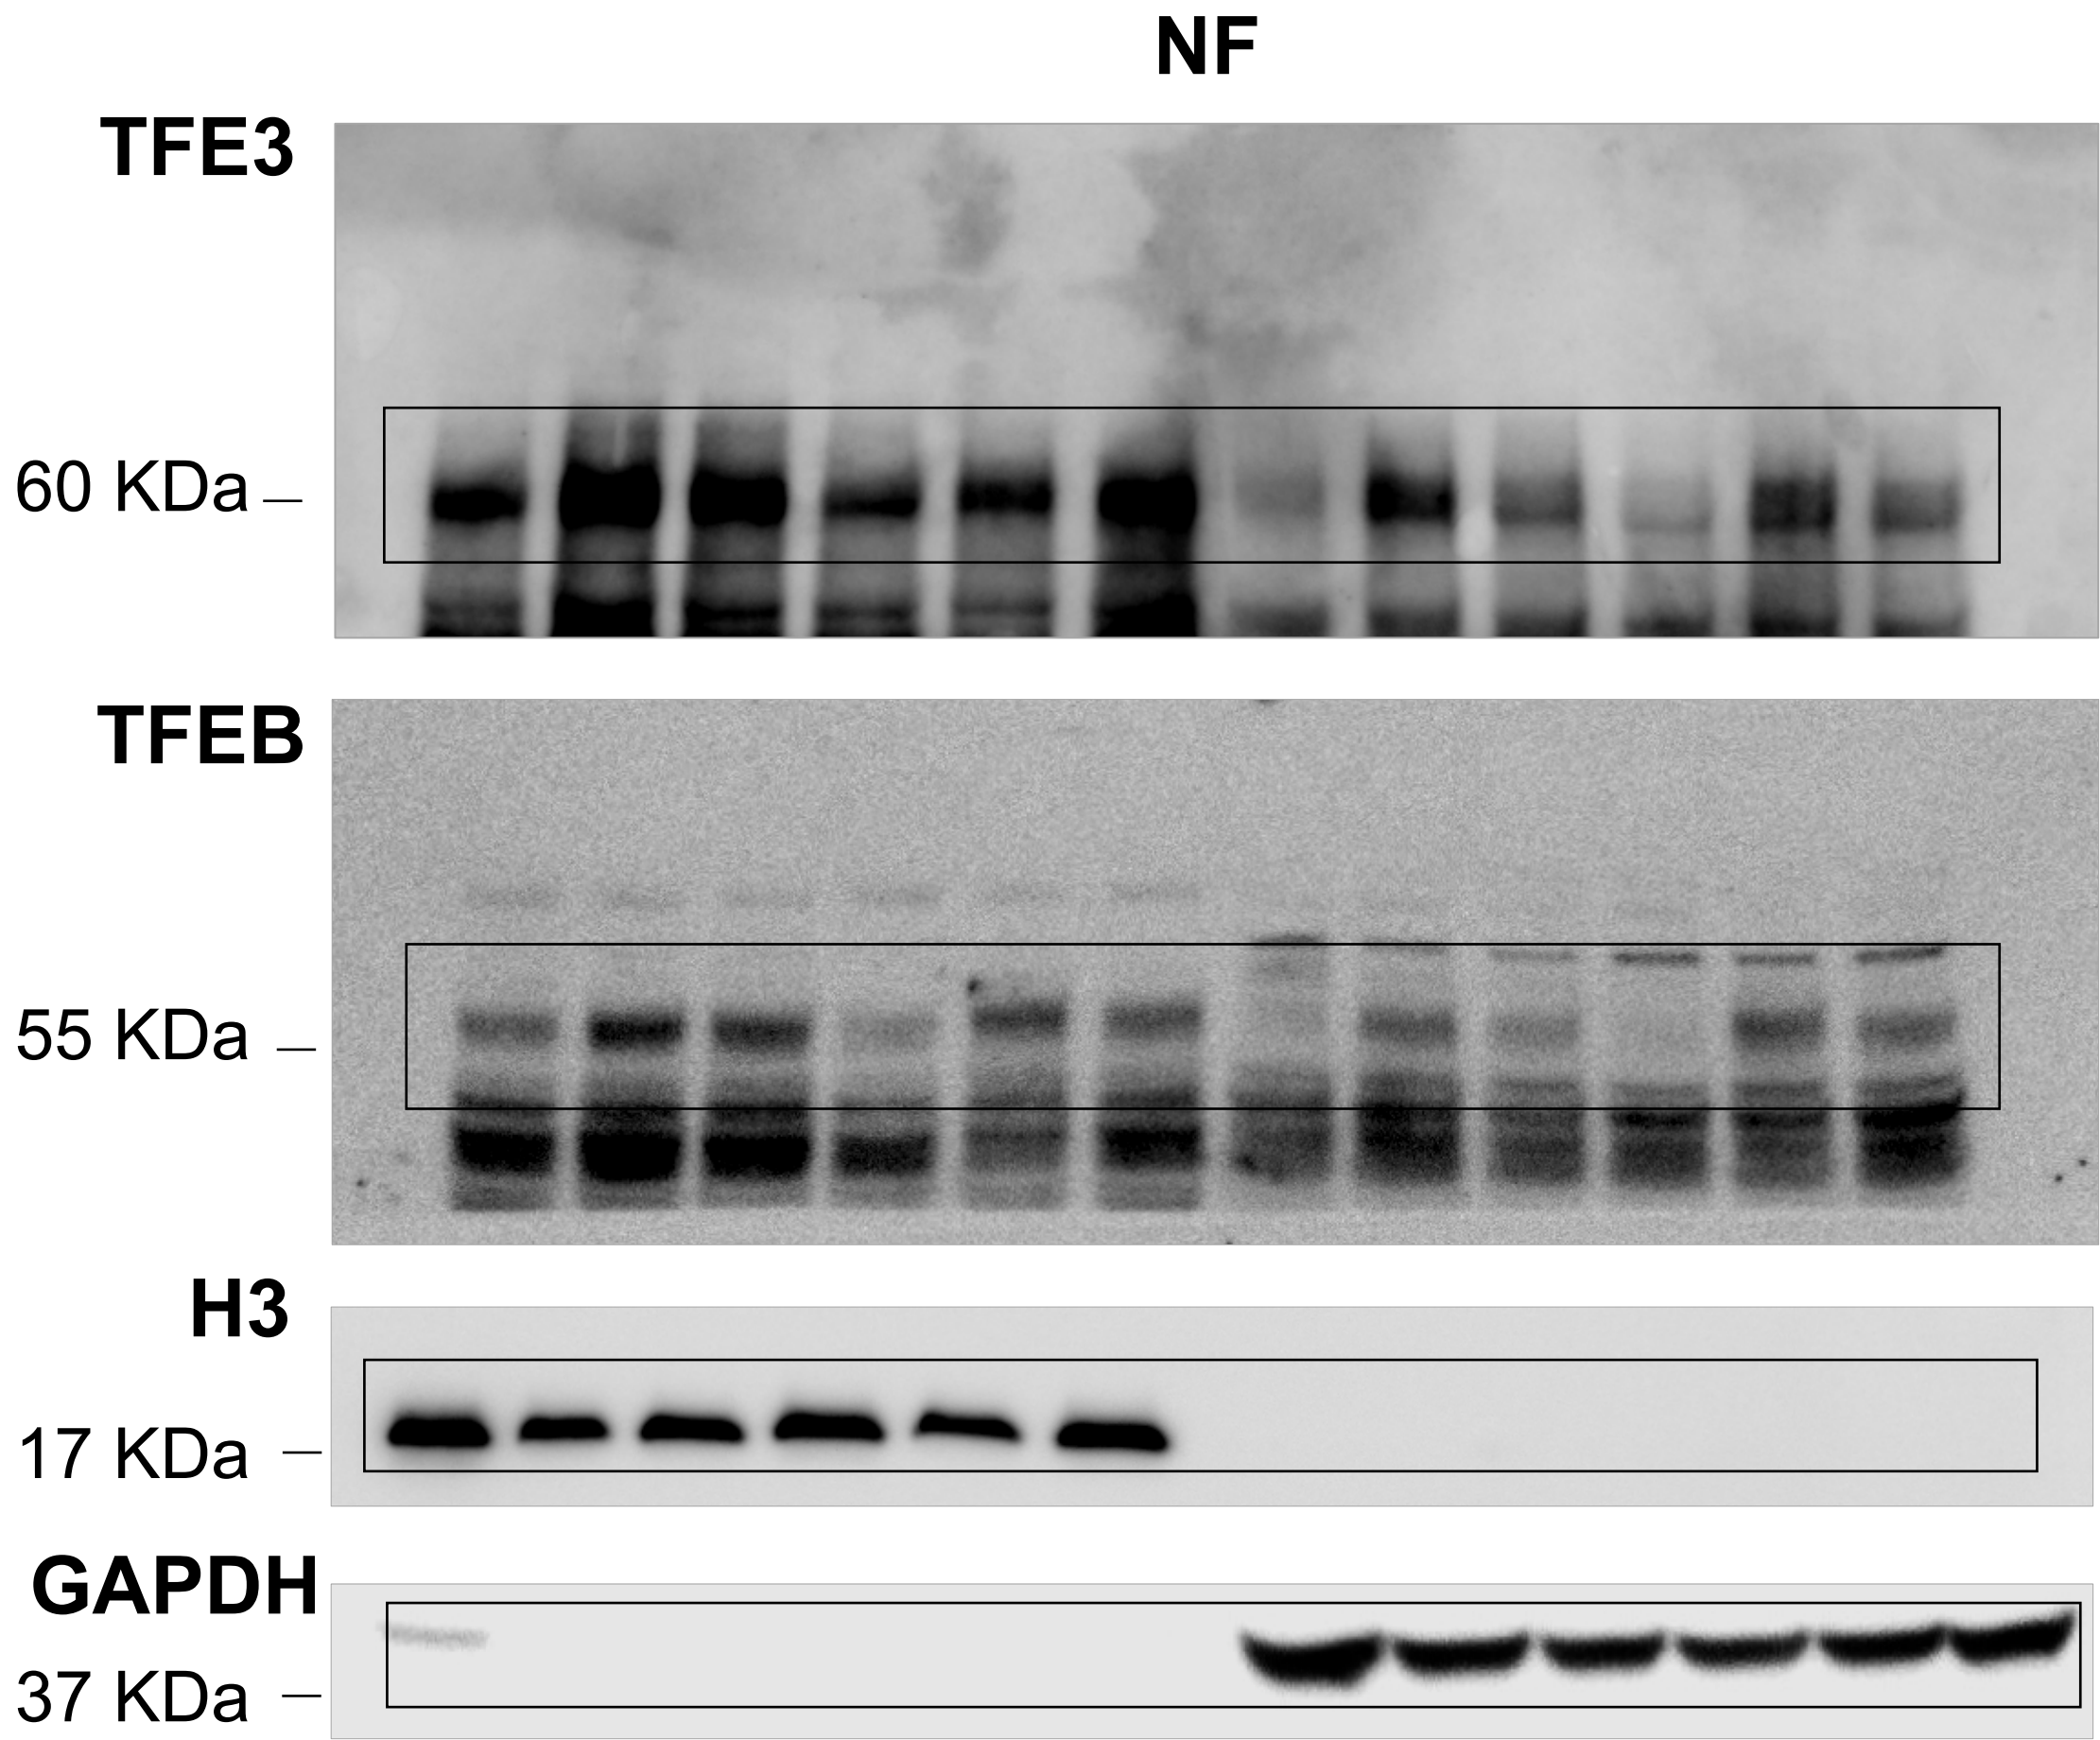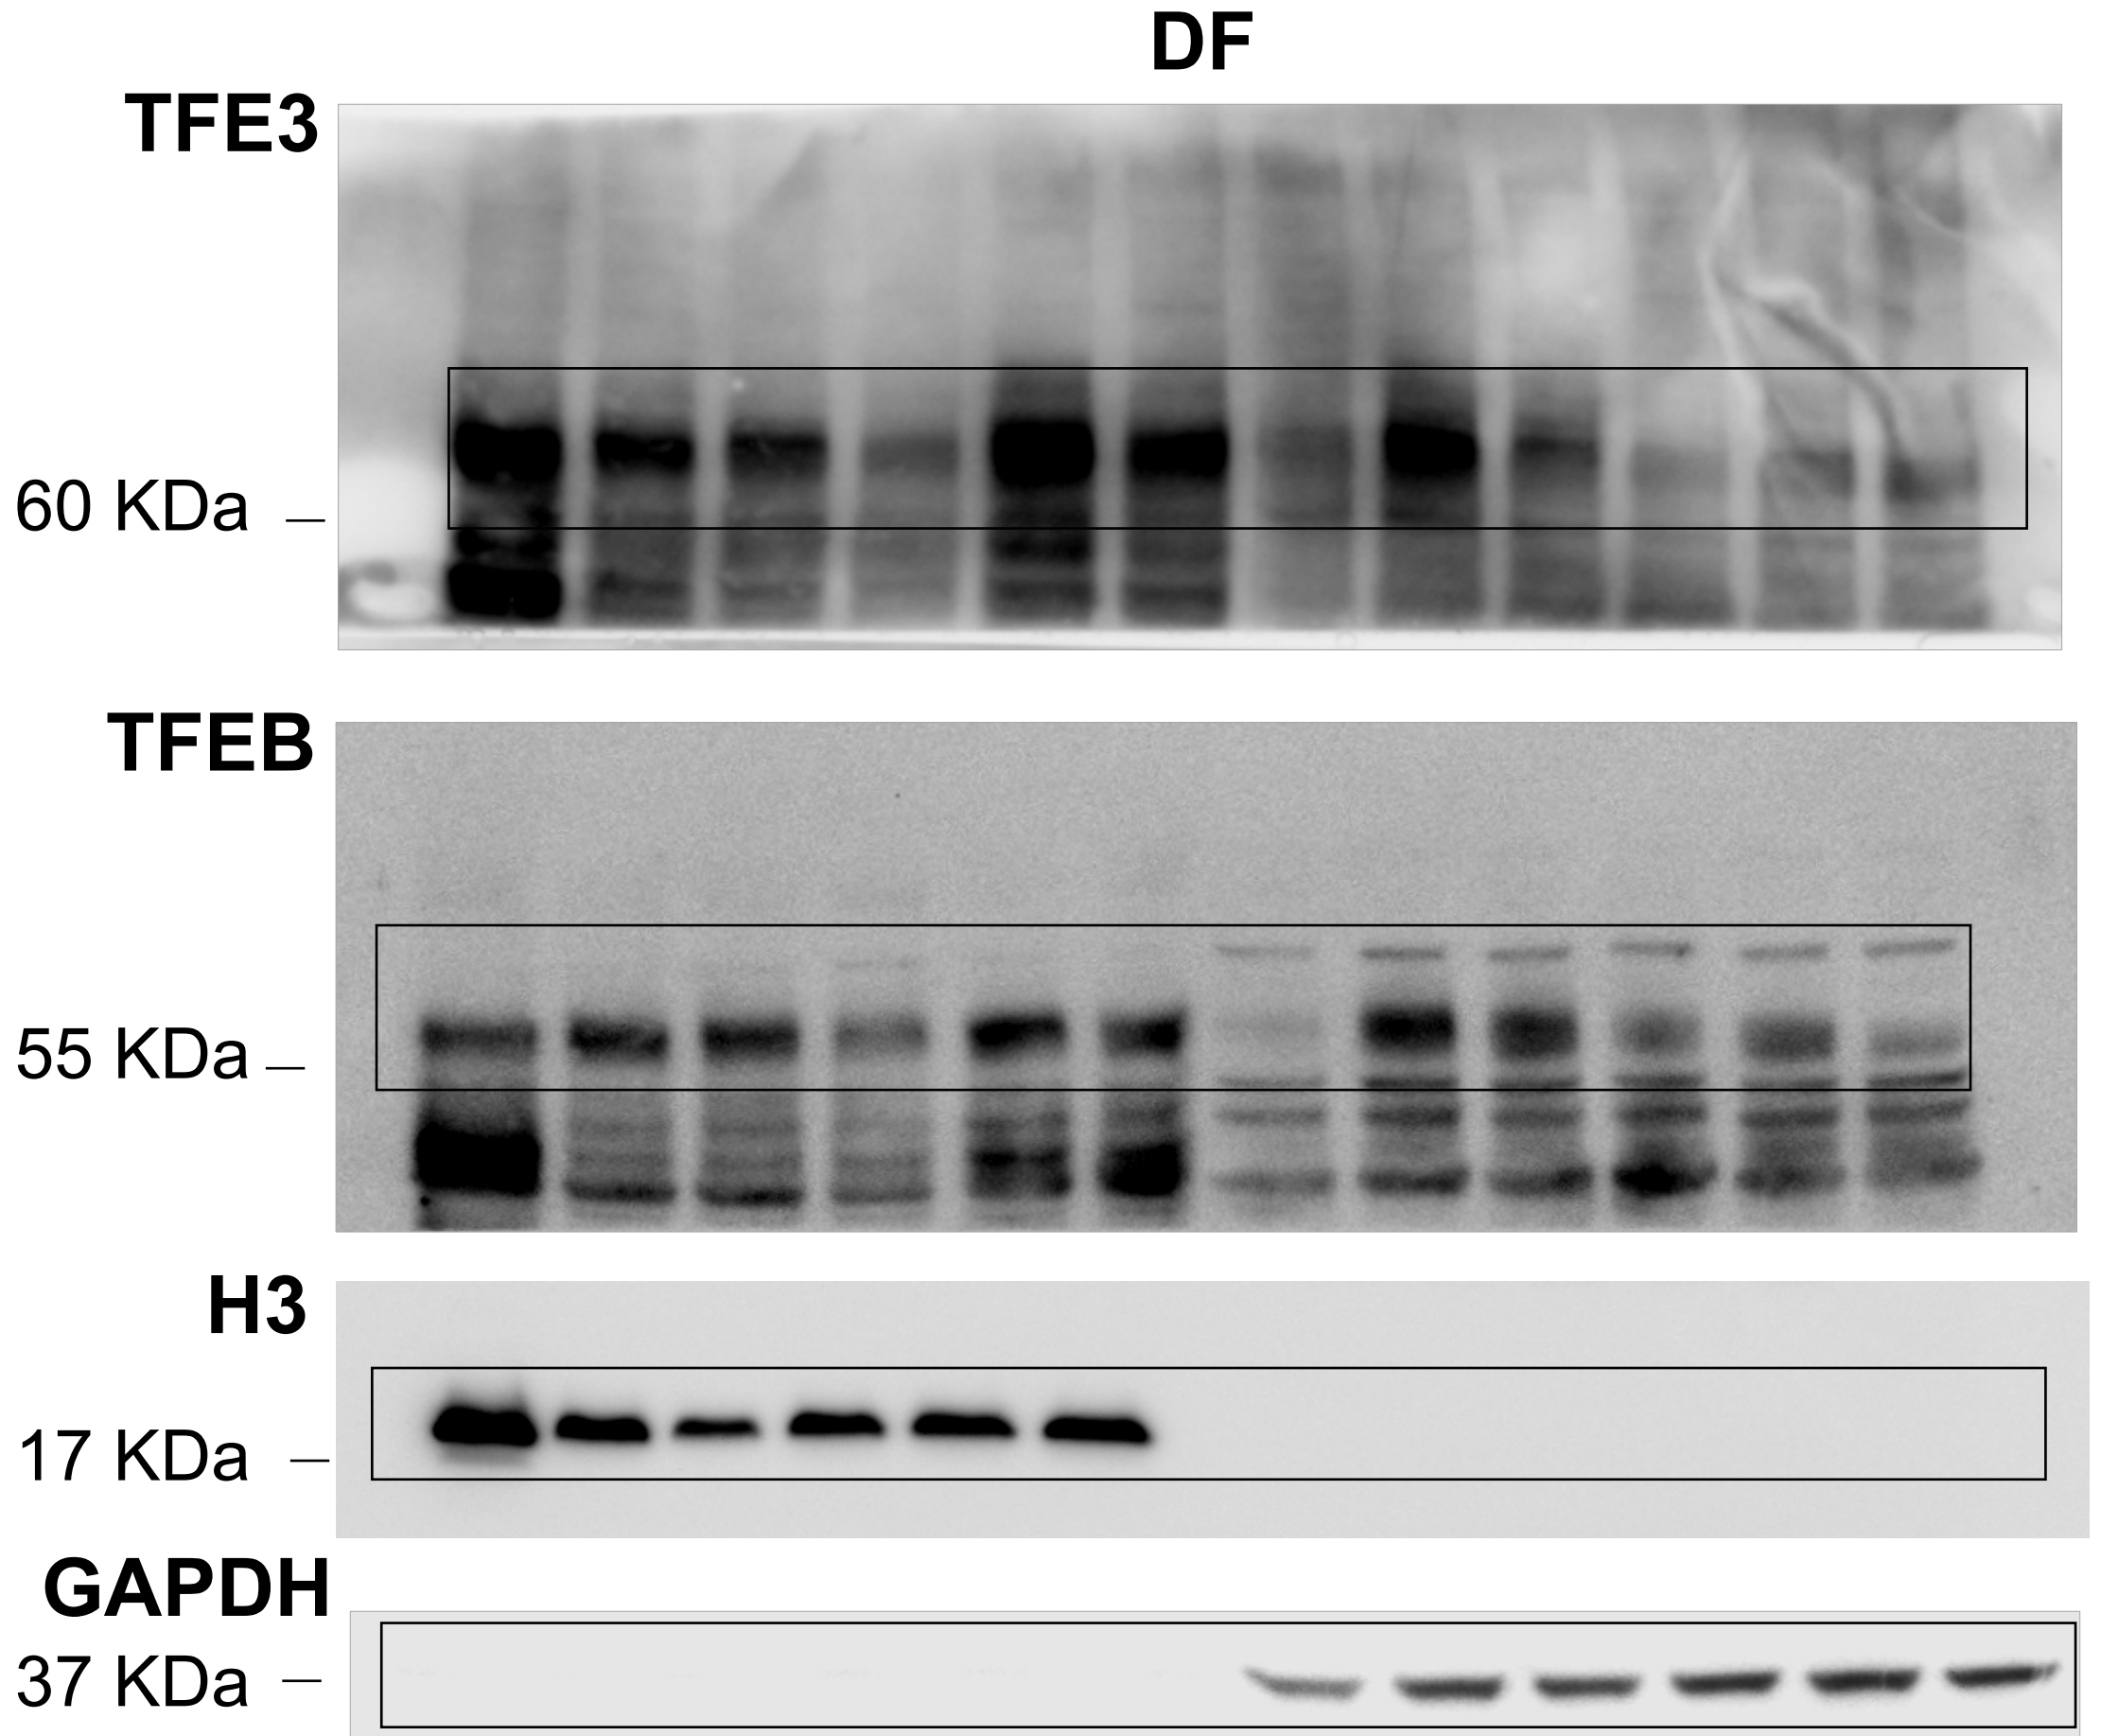

Supplement: EMBJ-38-e101347-s003.pdf [file EMBJ-38-e101347-s003.pdf]

**FIGURE 2A**

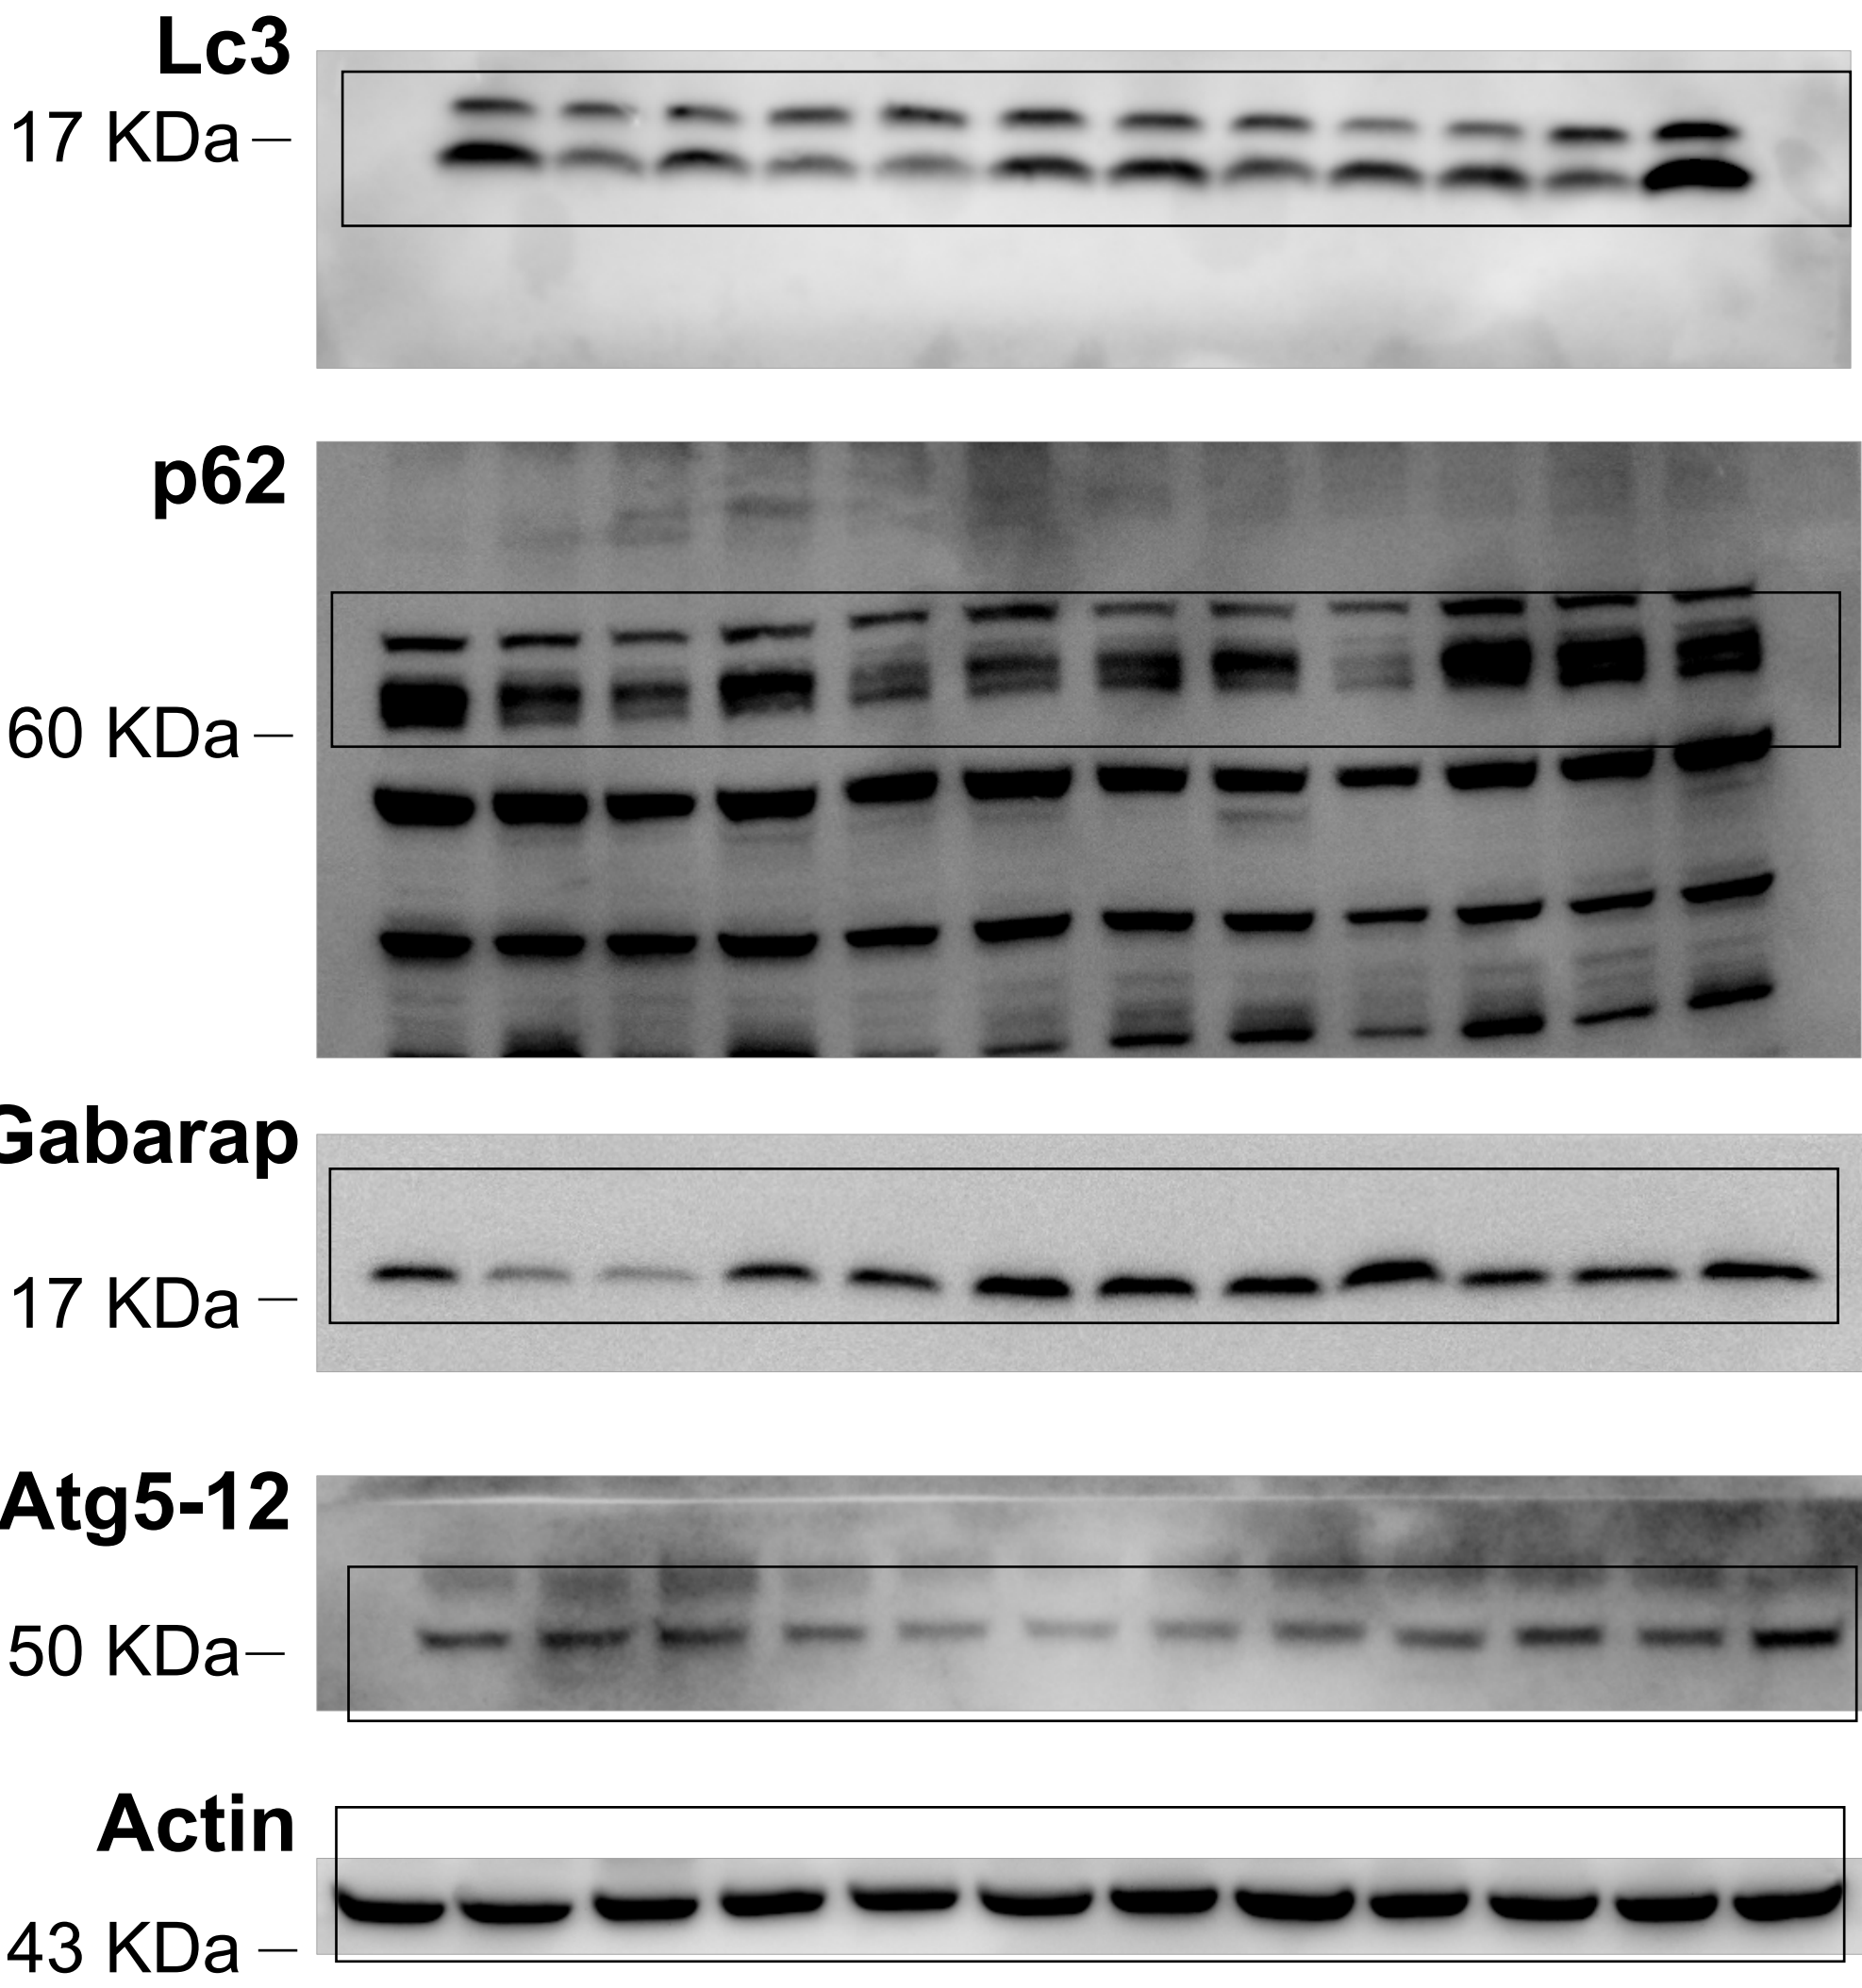

**FIGURE 2D**

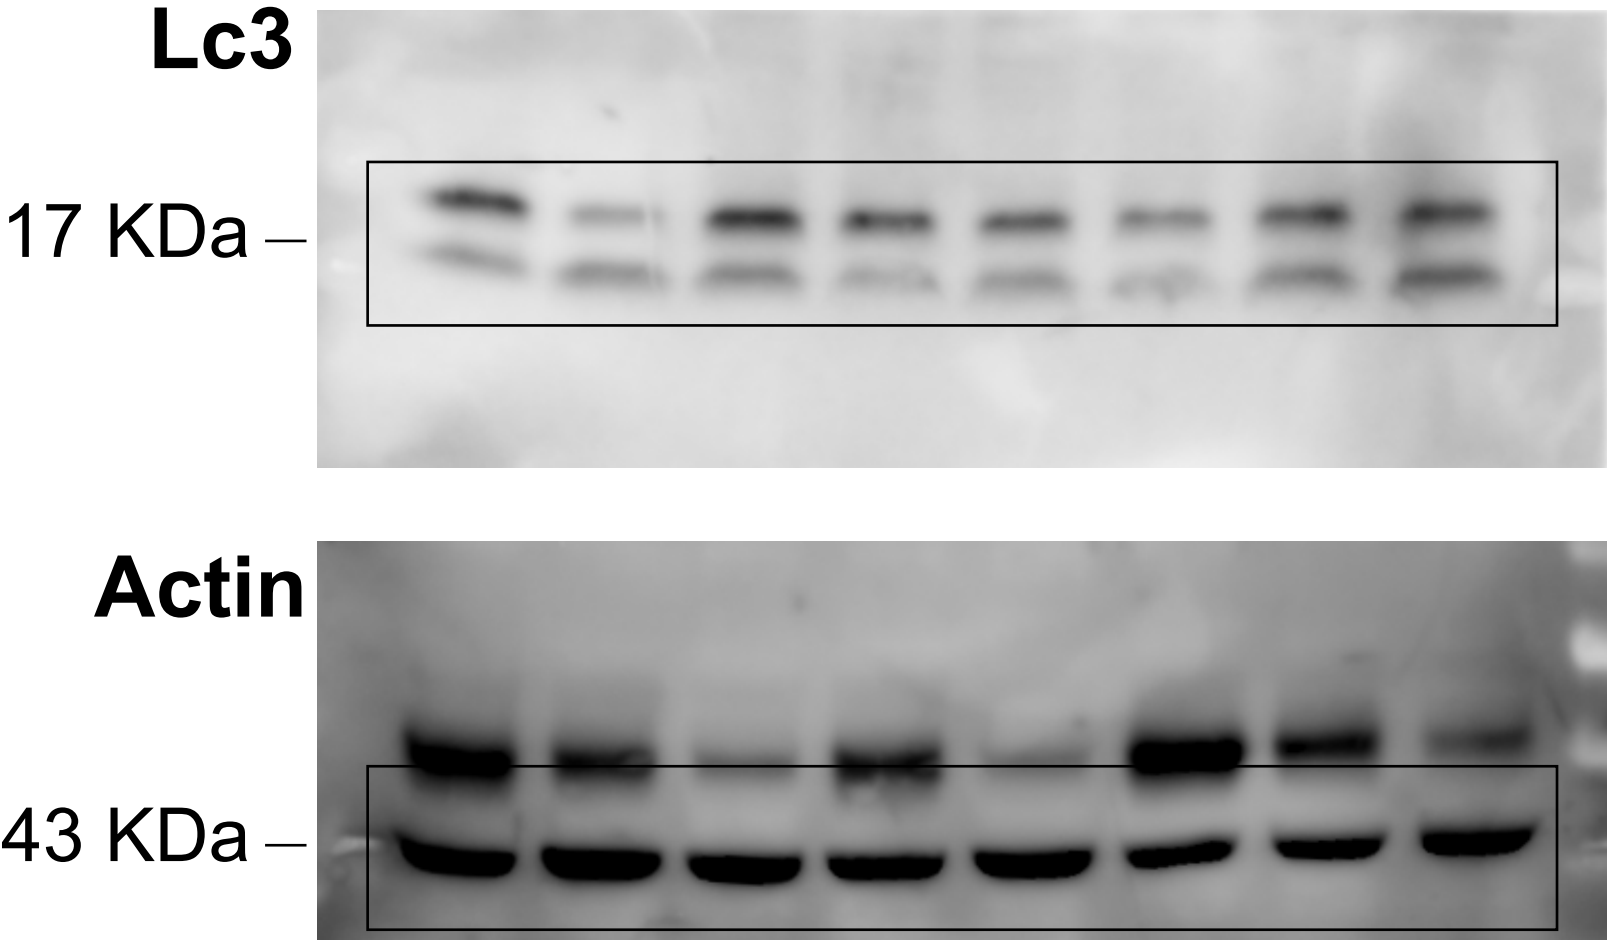

**FIGURE 2E**

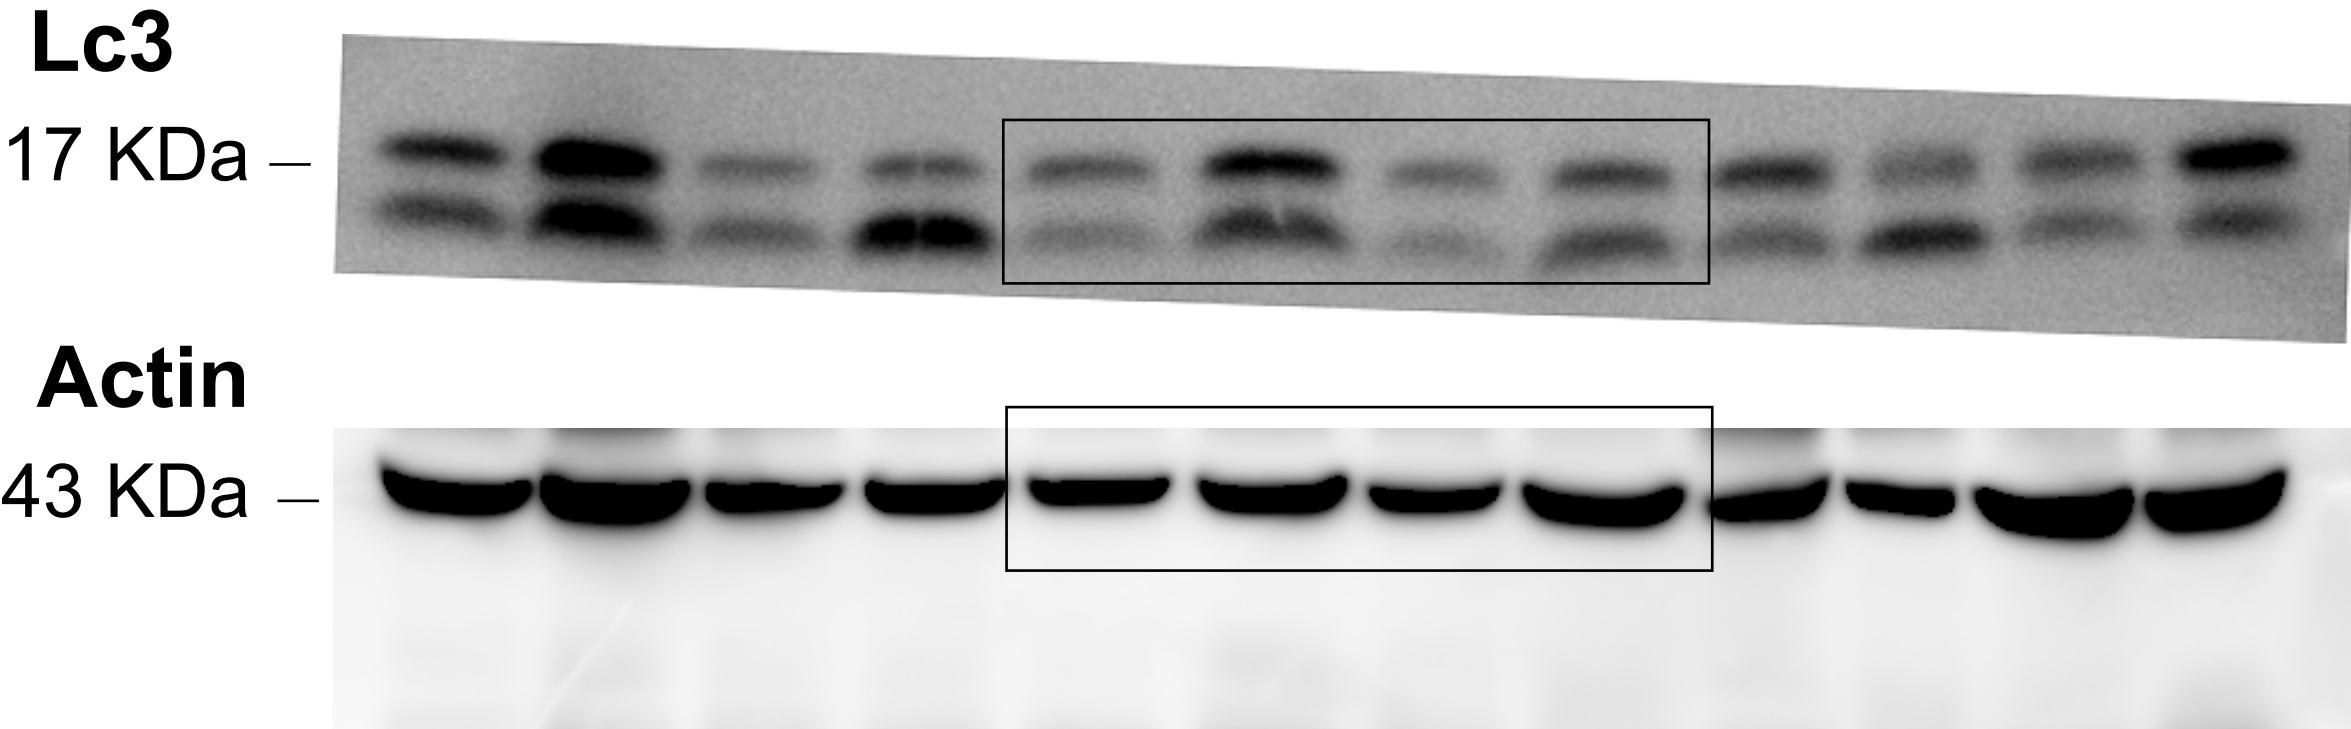

**FIGURE 2F**

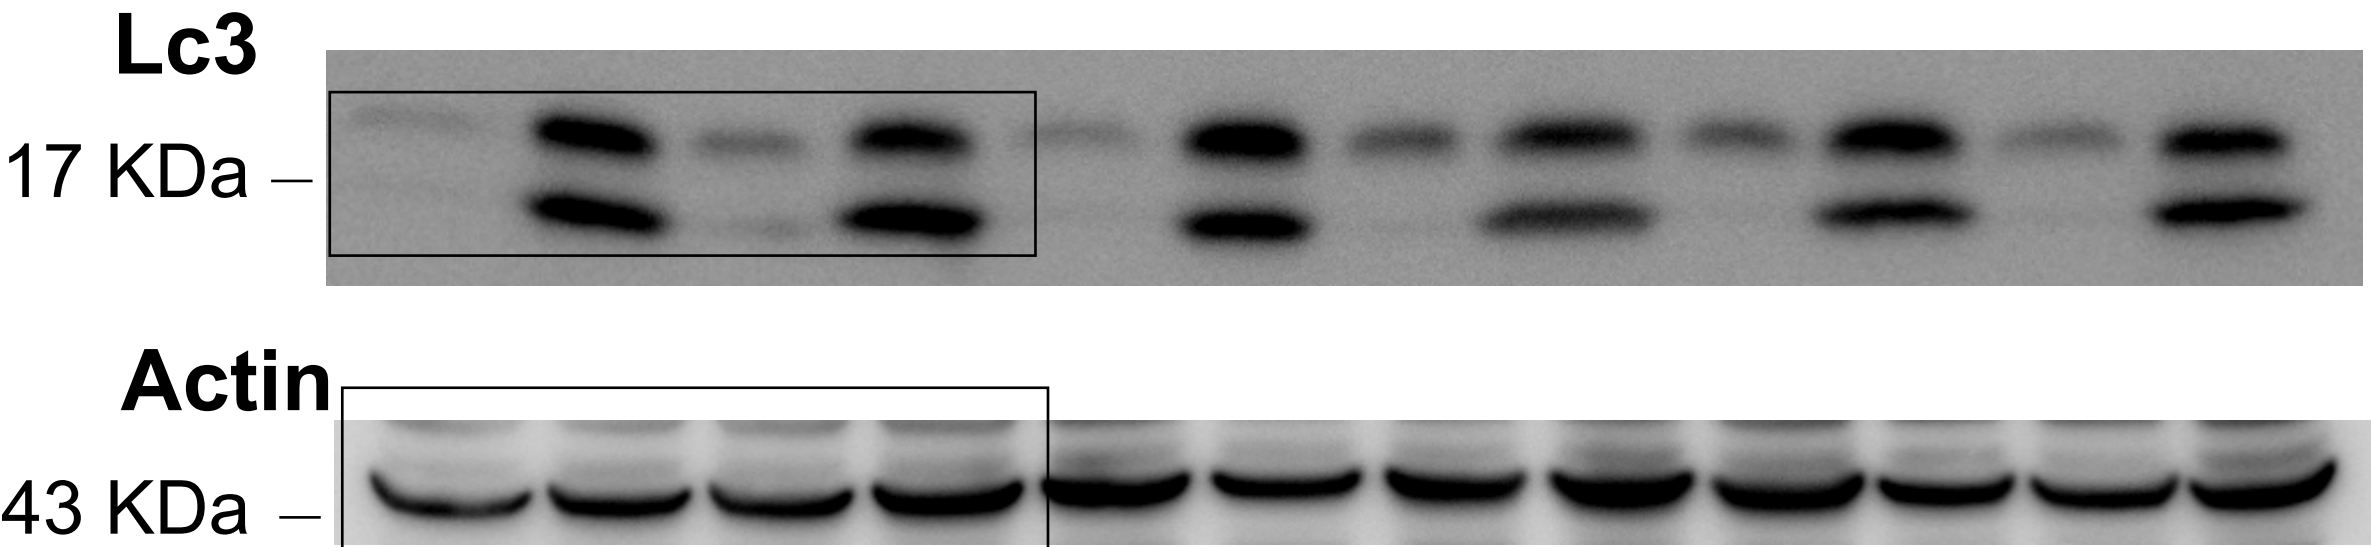

Supplement: EMBJ-38-e101347-s004.pdf [file EMBJ-38-e101347-s004.pdf]

**FIGURE 4G**

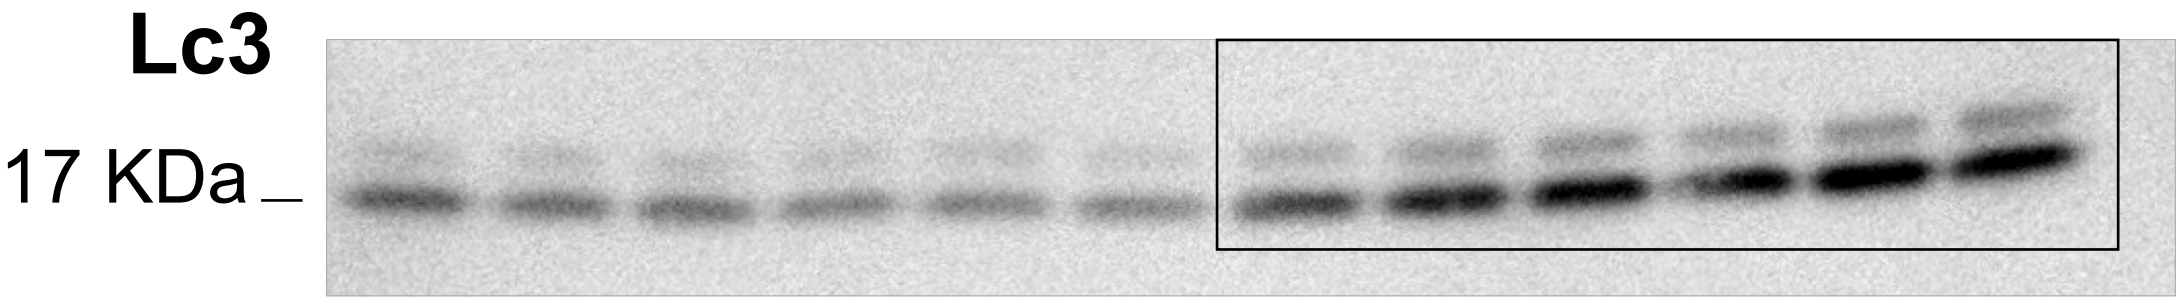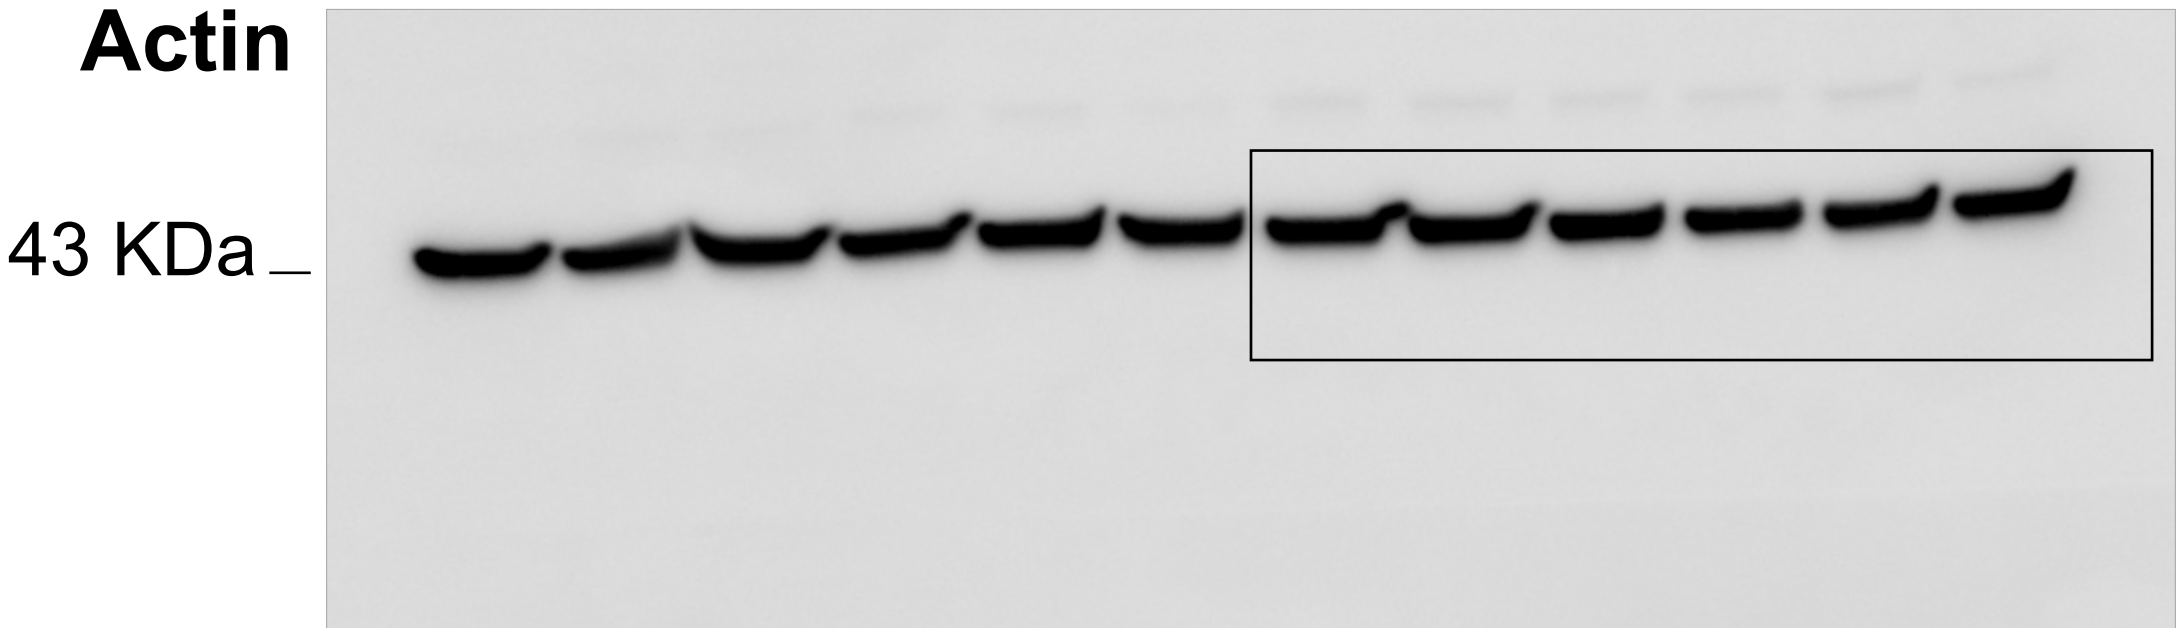

Supplement: EMBJ-38-e101347-s005.pdf [file EMBJ-38-e101347-s005.pdf]
